# Supplementary material for: Synthesis of alkylcarbonate analogs of O-acetyl-ADP-ribose
Source: Royal Society of Chemistry journal article supplement (doi:10.1039/c3ob41016a), 2013-01-01

## Electronic Supplementary Information

<sup>1</sup>H-NMR and <sup>13</sup>C-NMR spectra of all new compounds are provided below

|                                                                                                                                   |      |
|-----------------------------------------------------------------------------------------------------------------------------------|------|
| <sup>1</sup> H-NMR spectrum of <b>2,3,5-tri-O-benzoyl-1-O-benzyl-β-D-ribofuranoside 2</b>                                         | p.3  |
| <sup>13</sup> C-NMR spectrum of <b>2,3,5-tri-O-benzoyl-1-O-benzyl-β-D-ribofuranoside 2</b>                                        | p.4  |
| <sup>1</sup> H-NMR spectrum of <b>1-O-benzyl-β-D-ribofuranoside 3</b>                                                             | p.5  |
| <sup>13</sup> C-NMR spectrum of <b>1-O-benzyl-β-D-ribofuranoside 3</b>                                                            | p.6  |
| <sup>1</sup> H-NMR spectrum of <b>1-O-benzyl-5-O-tert-butylidimethylsilyl-β-D-ribofuranoside 4α</b>                               | p.7  |
| <sup>13</sup> C-NMR spectrum of <b>1-O-benzyl-5-O-tert-butylidimethylsilyl-β-D-ribofuranoside 4α</b>                              | p.8  |
| <sup>1</sup> H-NMR spectrum of <b>1-O-benzyl-5-O-tert-butylidimethylsilyl-β-D-ribofuranoside 4β</b>                               | p.9  |
| <sup>13</sup> C-NMR spectrum of <b>1-O-benzyl-5-O-tert-butylidimethylsilyl-β-D-ribofuranoside 4β</b>                              | p.10 |
| <sup>1</sup> H-NMR spectrum of <b>1-O-benzyl-2,3-O-bis(methylcarbonate)-5-O-tert-butylidimethylsilyl-β-D-ribofuranoside 5a</b>    | p.11 |
| <sup>13</sup> C-NMR spectrum of <b>1-O-benzyl-2,3-O-bis(methylcarbonate)-5-O-tert-butylidimethylsilyl-β-D-ribofuranoside 5a</b>   | p.12 |
| <sup>1</sup> H-NMR spectrum of <b>1-O-benzyl-2,3-O-bis(ethylcarbonate)-5-O-tert-butylidimethylsilyl-β-D-ribofuranoside 5b</b>     | p.13 |
| <sup>13</sup> C-NMR spectrum of <b>1-O-benzyl-2,3-O-bis(ethylcarbonate)-5-O-tert-butylidimethylsilyl-β-D-ribofuranoside 5b</b>    | p.14 |
| <sup>1</sup> H-NMR spectrum of <b>1-O-benzyl-2,3-O-bis(isobutylcarbonate)-5-O-tert-butylidimethylsilyl-β-D-ribofuranoside 5c</b>  | p.15 |
| <sup>13</sup> C-NMR spectrum of <b>1-O-benzyl-2,3-O-bis(isobutylcarbonate)-5-O-tert-butylidimethylsilyl-β-D-ribofuranoside 5c</b> | p.16 |
| <sup>1</sup> H-NMR spectrum of <b>1-O-benzyl-2,3-O-carbonate-5-O-tert-butylidimethylsilyl-β-D-ribofuranoside 5d</b>               | p.17 |
| <sup>13</sup> C-NMR spectrum of <b>1-O-benzyl-2,3-O-carbonate-5-O-tert-butylidimethylsilyl-β-D-ribofuranoside 5d</b>              | p.18 |
| <sup>1</sup> H-NMR spectrum of <b>1-O-benzyl-2,3-O-bis(methylcarbonate)-β-D-ribofuranoside 7a</b>                                 | p.19 |
| <sup>13</sup> C-NMR spectrum of <b>1-O-benzyl-2,3-O-bis(methylcarbonate)-β-D-ribofuranoside 7a</b>                                | p.20 |
| <sup>1</sup> H-NMR spectrum of <b>1-O-benzyl-2,3-O-bis(ethylcarbonate)-β-D-ribofuranoside 7b</b>                                  | p.21 |
| <sup>13</sup> C-NMR spectrum of <b>1-O-benzyl-2,3-O-bis(ethylcarbonate)-β-D-ribofuranoside 7b</b>                                 | p.22 |
| <sup>1</sup> H-NMR spectrum of <b>1-O-benzyl-2,3-O-bis(isobutylcarbonate)-β-D-ribofuranoside 7c</b>                               | p.23 |
| <sup>13</sup> C-NMR spectrum of <b>1-O-benzyl-2,3-O-bis(isobutylcarbonate)-β-D-ribofuranoside 7c</b>                              | p.24 |
| <sup>1</sup> H-NMR spectrum of <b>5-O-dibenzylphosphate-1-O-benzyl-2,3-O-bis(methylcarbonate)-β-D-ribofuranoside 9a</b>           | p.25 |
| <sup>13</sup> C-NMR spectrum of <b>5-O-dibenzylphosphate-1-O-benzyl-2,3-O-bis(methylcarbonate)-β-D-ribofuranoside 9a</b>          | p.26 |
| <sup>1</sup> H-NMR spectrum of <b>5-O-dibenzylphosphate-1-O-benzyl-2,3-O-bis(ethylcarbonate)-β-D-ribofuranoside 9b</b>            | p.27 |
| <sup>13</sup> C-NMR spectrum of <b>5-O-dibenzylphosphate-1-O-benzyl-2,3-O-bis(ethylcarbonate)-β-D-ribofuranoside 9b</b>           | p.28 |
| <sup>1</sup> H-NMR spectrum of <b>5-O-dibenzylphosphate-1-O-benzyl-2,3-O-bis(isobutylcarbonate)-β-D-ribofuranoside 9c</b>         | p.29 |
| <sup>13</sup> C-NMR spectrum of <b>5-O-dibenzylphosphate-1-O-benzyl-2,3-O-bis(isobutylcarbonate)-β-D-ribofuranoside 9c</b>        | p.30 |

|                                                                                                                                                                                 |      |
|---------------------------------------------------------------------------------------------------------------------------------------------------------------------------------|------|
| <sup>1</sup> H-NMR spectrum of <b>5-O-dibenzylphosphate-2,3-O-carbonate-β-D-ribofuranose 9d</b>                                                                                 | p.31 |
| <sup>13</sup> C-NMR spectrum of <b>5-O-dibenzylphosphate-2,3-O-carbonate-β-D-ribofuranose 9d</b>                                                                                | p.32 |
| <sup>1</sup> H-NMR spectrum of <b>5-O-dibenzylphosphate-1,2-O-isopropylidene-3-O-methylcarbonate-α-D-ribofuranoside 10a</b>                                                     | p.33 |
| <sup>13</sup> C-NMR spectrum of <b>5-O-dibenzylphosphate-1,2-O-isopropylidene-3-O-methylcarbonate-α-D-ribofuranoside 10a</b>                                                    | p.34 |
| <sup>1</sup> H-NMR spectrum of <b>5-O-dibenzylphosphate-1,2-O-isopropylidene-3-O-ethylcarbonate-α-D-ribofuranoside 10b</b>                                                      | p.35 |
| <sup>13</sup> C-NMR spectrum of <b>5-O-dibenzylphosphate-1,2-O-isopropylidene-3-O-ethylcarbonate-α-D-ribofuranoside 10b</b>                                                     | p.36 |
| <sup>1</sup> H-NMR spectrum of <b>5-O-dibenzylphosphate-1,2-O-isopropylidene-3-O-isobutylcarbonate-α-D-ribofuranoside 10c</b>                                                   | p.37 |
| <sup>13</sup> C-NMR spectrum of <b>5-O-dibenzylphosphate-1,2-O-isopropylidene-3-O-isobutylcarbonate-α-D-ribofuranoside 10c</b>                                                  | p.38 |
| <sup>1</sup> H-NMR spectrum of <b>5-O-phosphate-1-O-benzyl-2,3-O-bis(methylcarbonate)-β-D-ribofuranoside 12a</b>                                                                | p.39 |
| <sup>13</sup> C-NMR spectrum of <b>5-O-phosphate-1-O-benzyl-2,3-O-bis(methylcarbonate)-β-D-ribofuranoside 12a</b>                                                               | p.40 |
| <sup>1</sup> H-NMR spectrum of <b>5-O-phosphate-1-O-benzyl-2,3-O-bis(ethylcarbonate)-β-D-ribofuranoside 12b</b>                                                                 | p.41 |
| <sup>13</sup> C-NMR spectrum of <b>5-O-phosphate-1-O-benzyl-2,3-O-bis(ethylcarbonate)-β-D-ribofuranoside 12b</b>                                                                | p.42 |
| <sup>1</sup> H-NMR spectrum of <b>5-O-phosphate-1,2-O-carbonate-3-O-methylcarbonate-β-D-ribofuranoside 15a</b>                                                                  | p.43 |
| <sup>13</sup> C-NMR spectrum of <b>5-O-phosphate-1,2-O-carbonate-3-O-methylcarbonate-β-D-ribofuranoside 15a</b>                                                                 | p.44 |
| <sup>1</sup> H-NMR spectrum of <b>5-O-phosphate-2,3-O-bis(ethylcarbonate)-D-ribofuranoside 13b and 5-O-phosphate-1,2-O-carbonate-3-O-ethylcarbonate-β-D-ribofuranoside 15b</b>  | p.45 |
| <sup>13</sup> C-NMR spectrum of <b>5-O-phosphate-2,3-O-bis(ethylcarbonate)-D-ribofuranoside 13b and 5-O-phosphate-1,2-O-carbonate-3-O-ethylcarbonate-β-D-ribofuranoside 15b</b> | p.46 |
| <sup>1</sup> H-NMR spectrum of <b>5-O-phosphate-1,2-O-carbonate-3-O-isobutylcarbonate-β-D-ribofuranoside 15c</b>                                                                | p.47 |
| <sup>13</sup> C-NMR spectrum of <b>5-O-phosphate-1,2-O-carbonate-3-O-isobutylcarbonate-β-D-ribofuranoside 15c</b>                                                               | p.48 |
| <sup>1</sup> H-NMR spectrum of <b>5-O-phosphate-2,3-O-carbonate-β-D-ribofuranose 11d</b>                                                                                        | p.49 |
| <sup>13</sup> C-NMR spectrum of <b>5-O-phosphate-2,3-O-carbonate-β-D-ribofuranose 11d</b>                                                                                       | p.50 |
| <sup>1</sup> H-NMR spectrum of <b>2',3'-O-carbonate-ADP-ribose 13d + 1',2'-O-carbonate-ADP-riboside 13e</b>                                                                     | p.51 |
| <sup>13</sup> C-NMR spectrum of <b>2',3'-O-carbonate-ADP-ribose 13d + 1',2'-O-carbonate-ADP-riboside 13e</b>                                                                    | p.52 |
| <sup>1</sup> H-NMR spectrum of <b>1',2'-O-carbonate-3'-O-methylcarbonate-ADP-ribofuranoside 16a</b>                                                                             | p.53 |
| <sup>13</sup> C-NMR spectrum of <b>1',2'-O-carbonate-3'-O-methylcarbonate-ADP-ribofuranoside 16a</b>                                                                            | p.54 |
| <sup>1</sup> H-NMR spectrum of <b>1',2'-O-carbonate-3'-O-ethylcarbonate-ADP-ribofuranoside 16b</b>                                                                              | p.55 |
| <sup>13</sup> C-NMR spectrum of <b>1',2'-O-carbonate-3'-O-ethylcarbonate-ADP-ribofuranoside 16b</b>                                                                             | p.56 |
| <sup>1</sup> H-NMR spectrum of <b>1',2'-O-carbonate-3'-O-isobutylcarbonate-ADP-ribofuranoside 16c</b>                                                                           | p.57 |
| <sup>13</sup> C-NMR spectrum of <b>1',2'-O-carbonate-3'-O-isobutylcarbonate-ADP-ribofuranoside 16c</b>                                                                          | p.58 |
| <sup>1</sup> H-NMR spectrum of <b>1'-O-benzyl-2',3'-O-bis(ethylcarbonate)-ADP-ribofuranoside 17b</b>                                                                            | p.59 |
| <sup>13</sup> C-NMR spectrum of <b>1'-O-benzyl-2',3'-O-bis(ethylcarbonate)-ADP-ribofuranoside 17b</b>                                                                           | p.60 |

### 2,3,5-tri-O-benzoyl-1-O-benzyl-β-D-ribofuranoside 2: <sup>1</sup>H-NMR

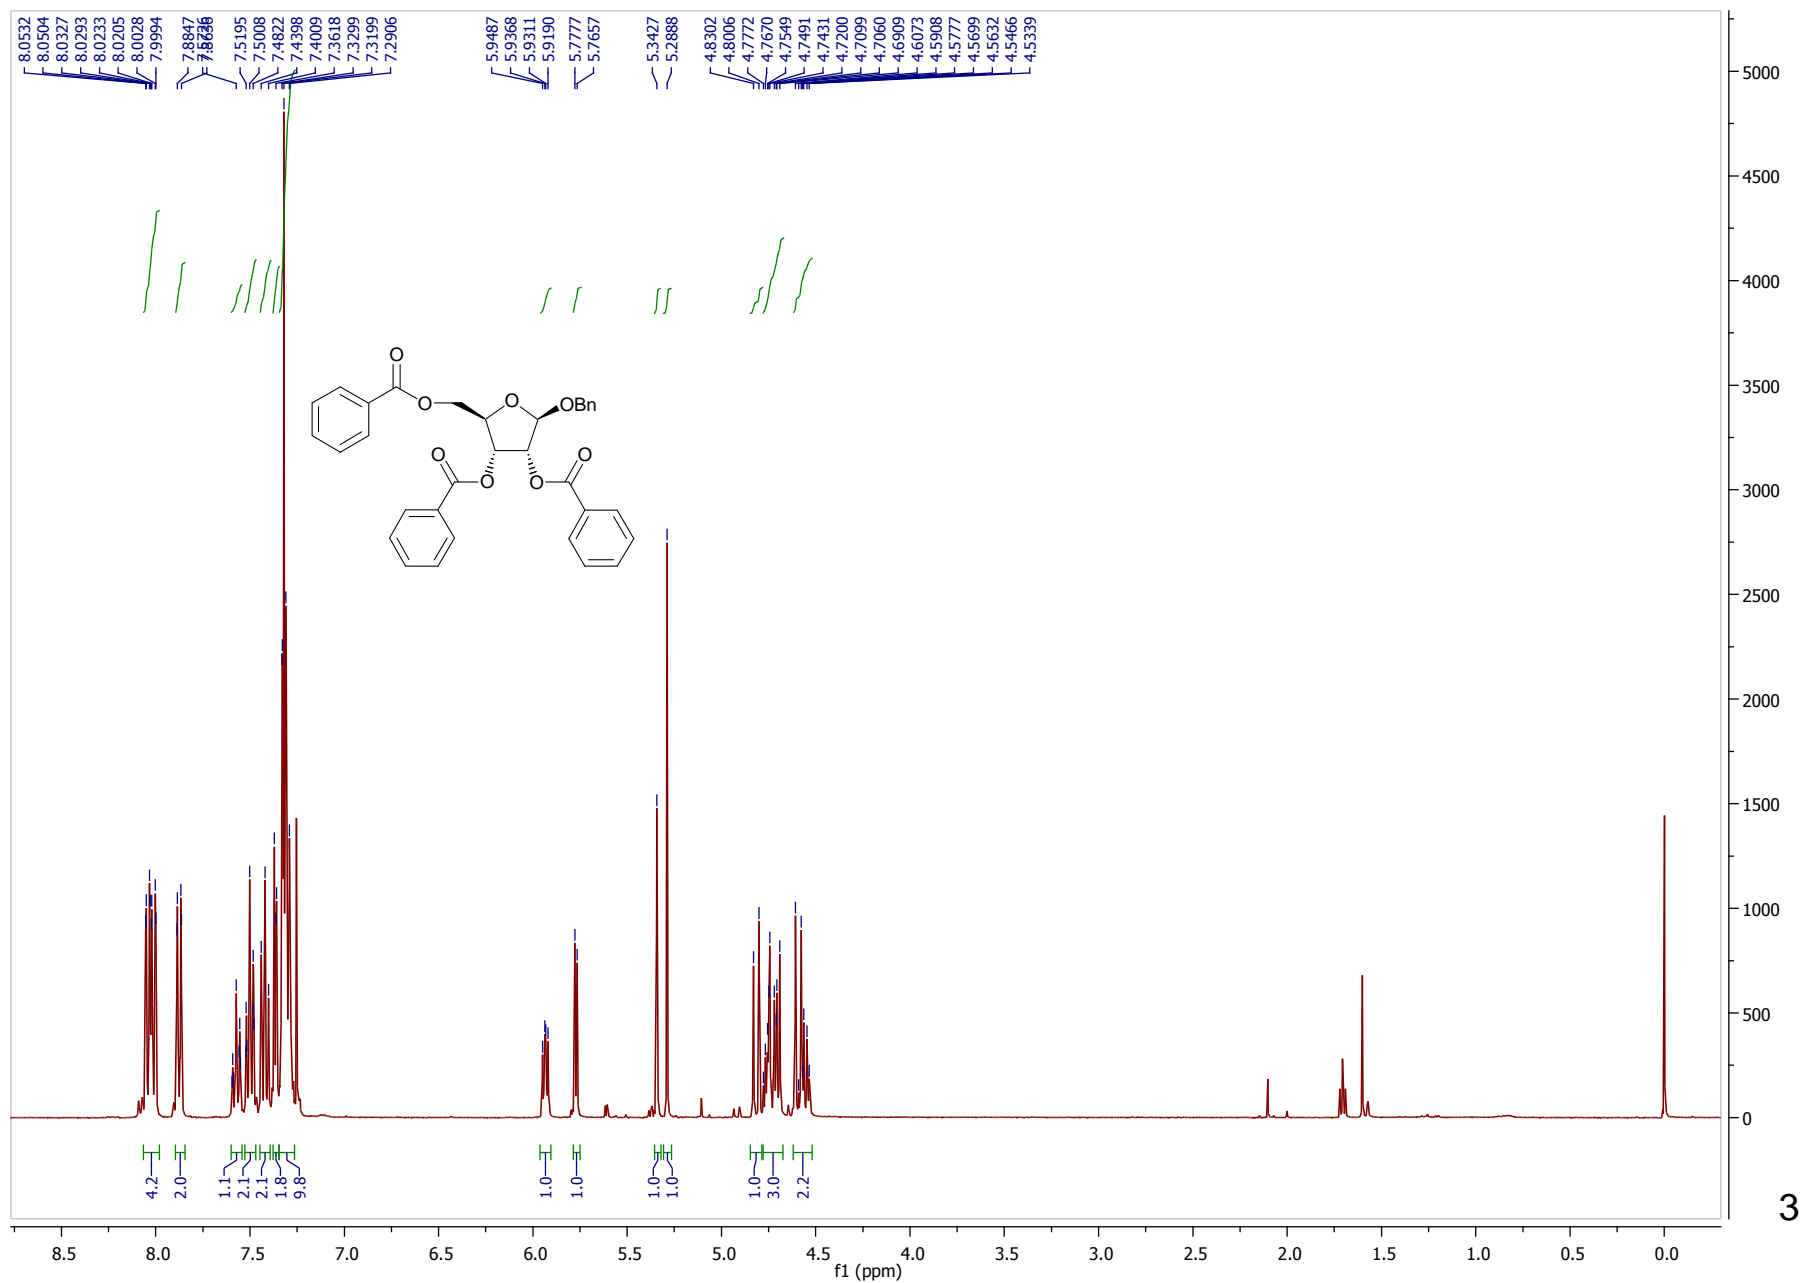

*2,3,5-tri-O-benzoyl-1-O-benzyl-β-D-ribofuranoside 2*: <sup>13</sup>C-NMR

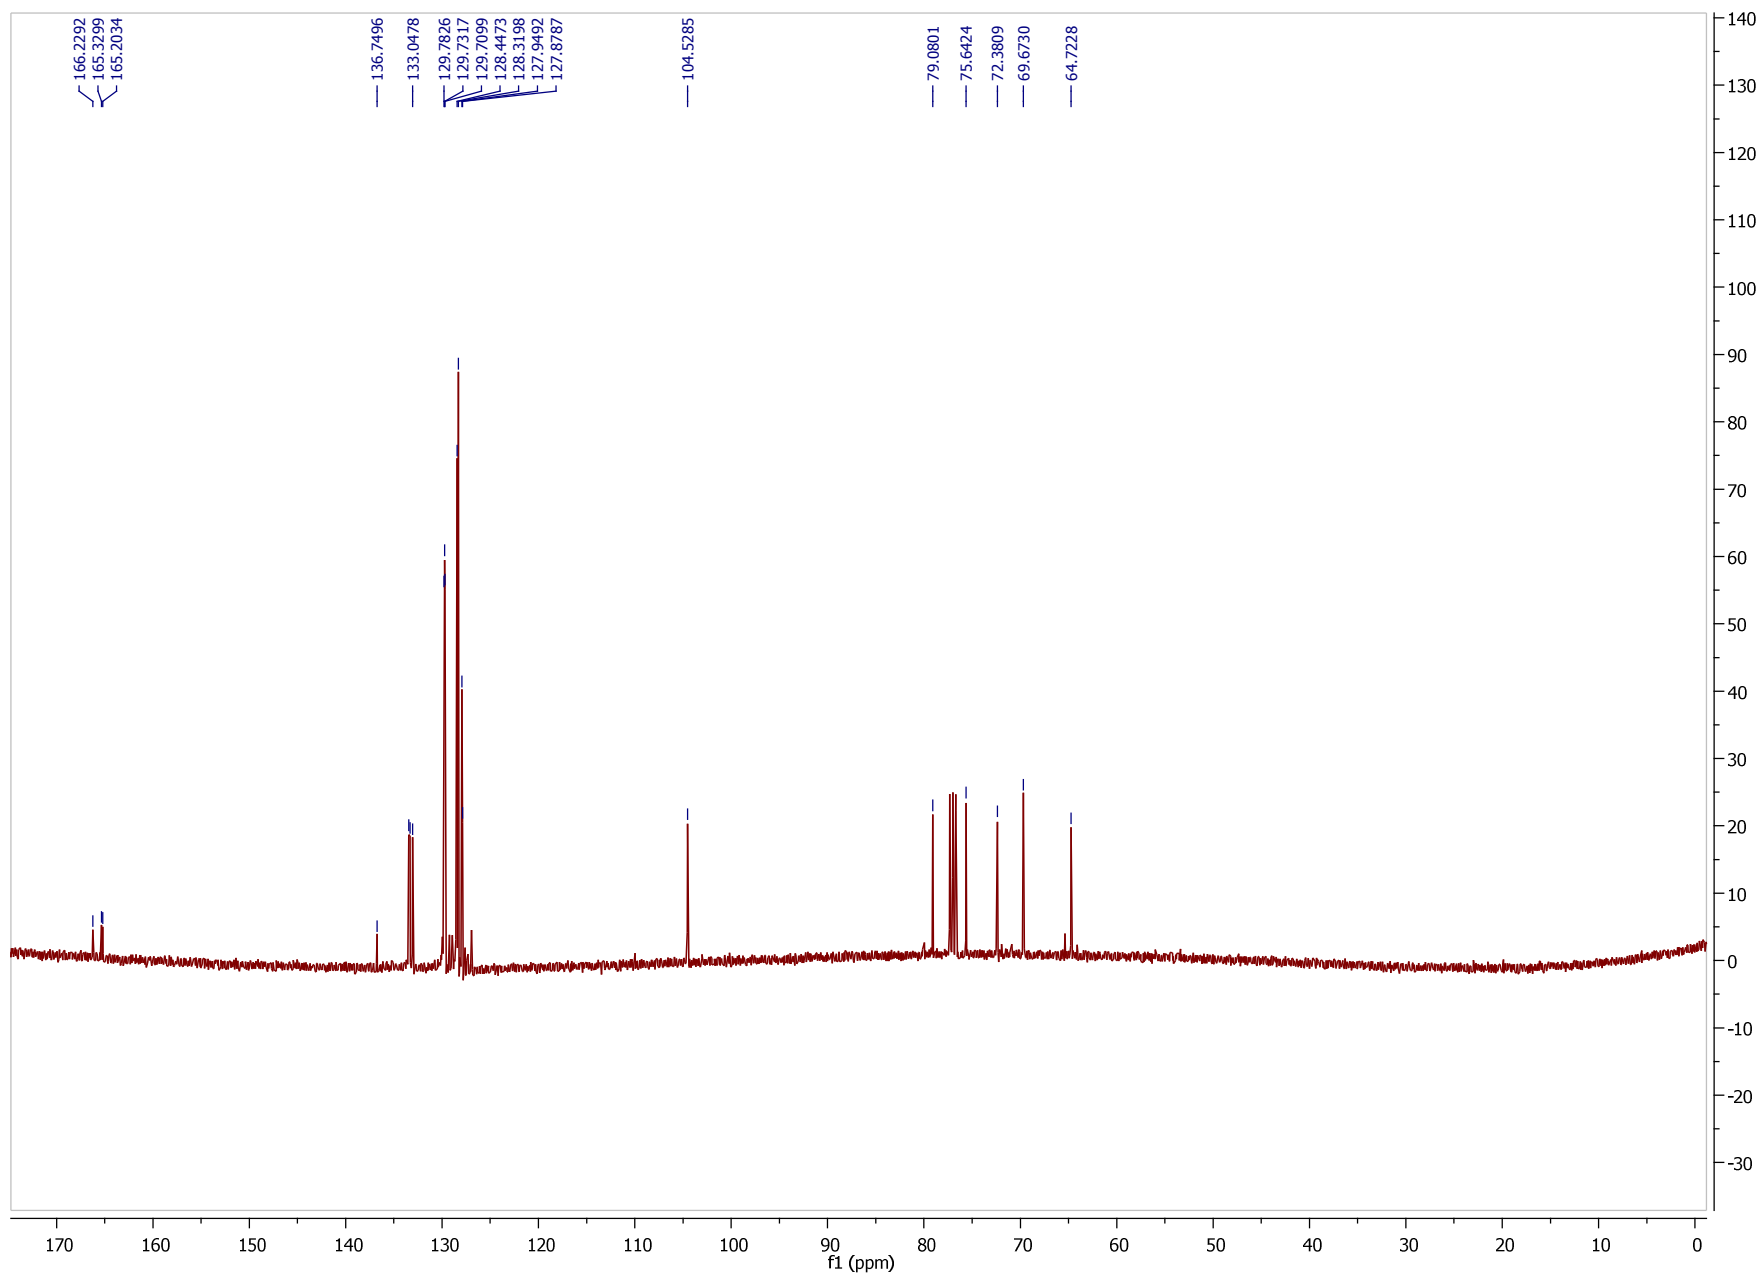

1-O-benzyl- $\beta$ -D-ribofuranoside **3**:  $^1\text{H-NMR}$

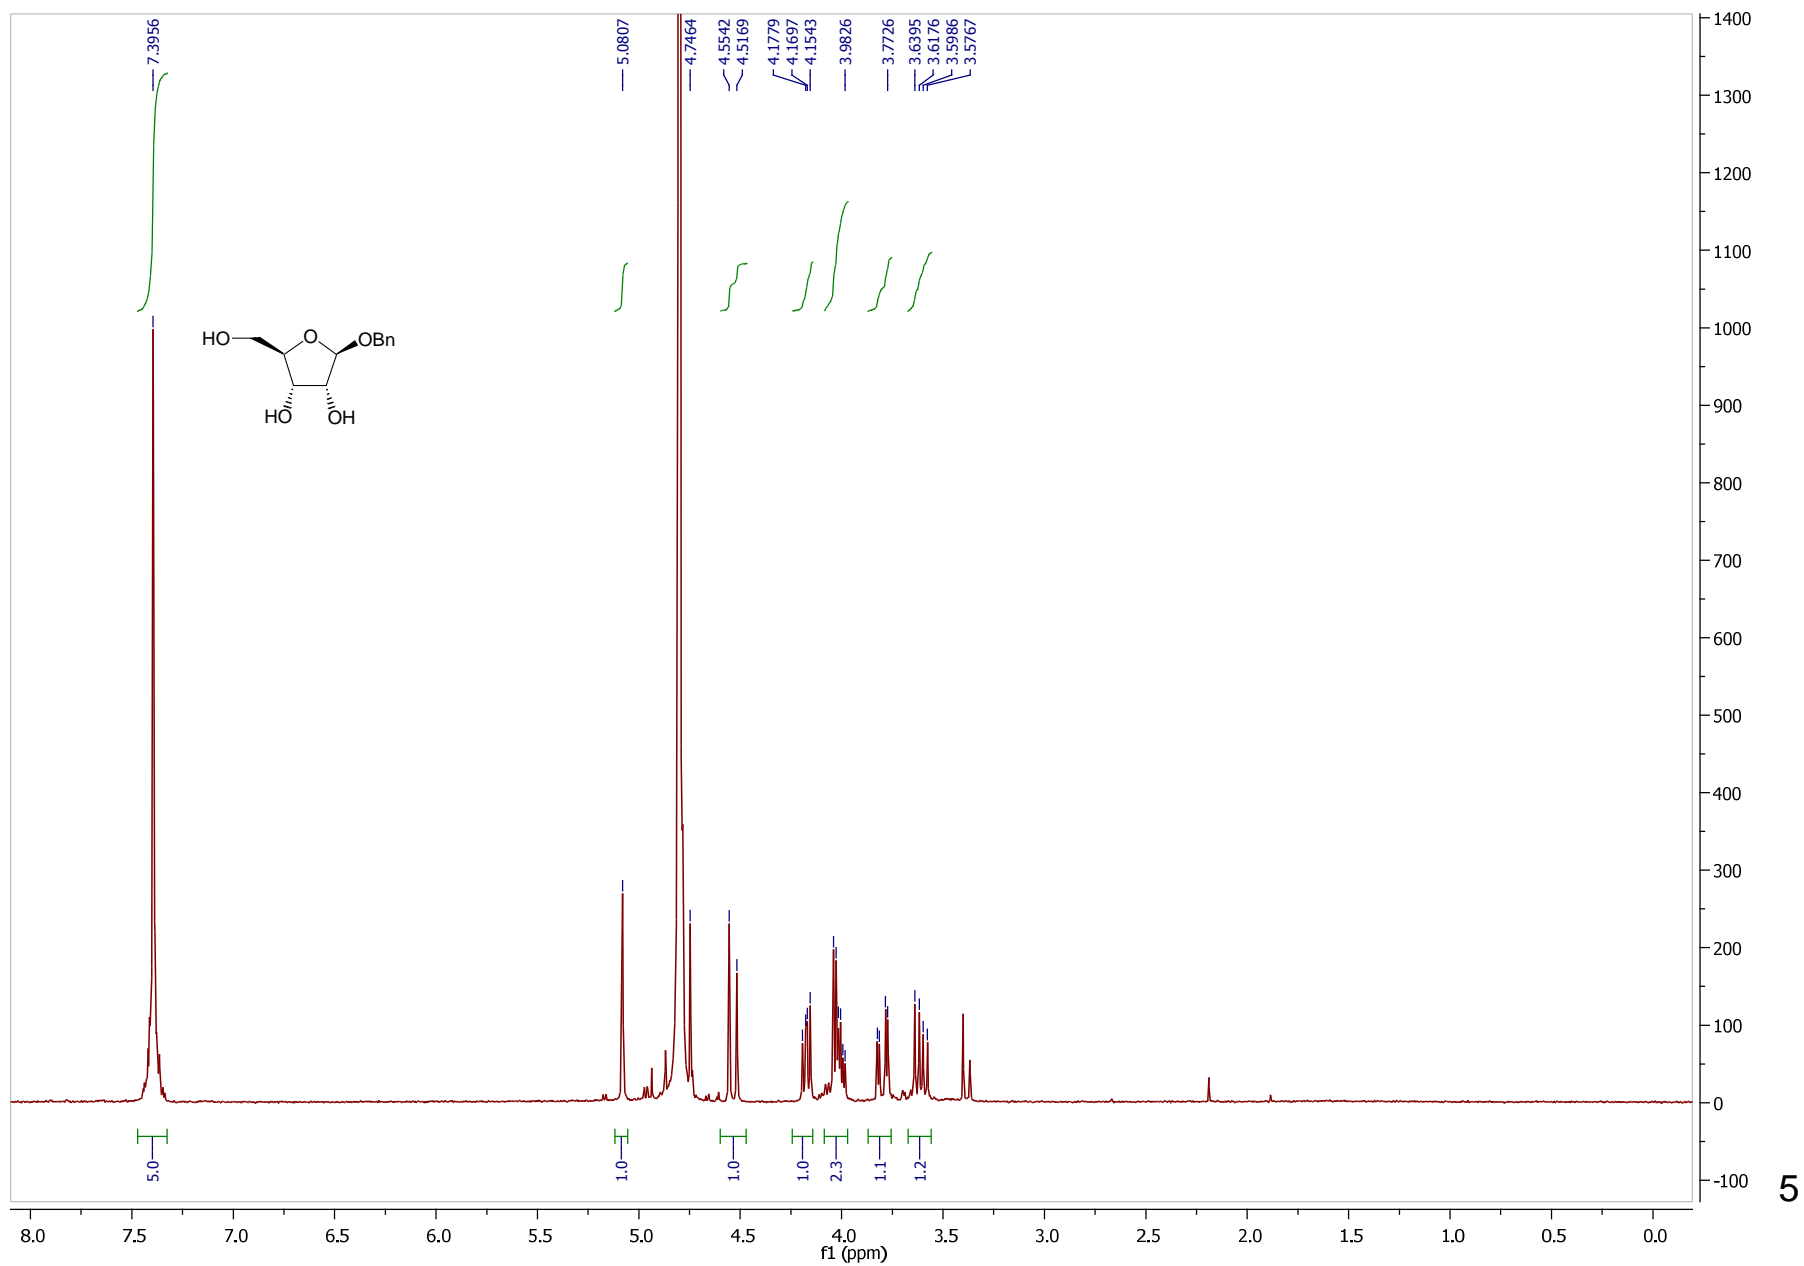

*1-O-benzyl-β-D-ribofuranoside 3*: <sup>13</sup>C-NMR

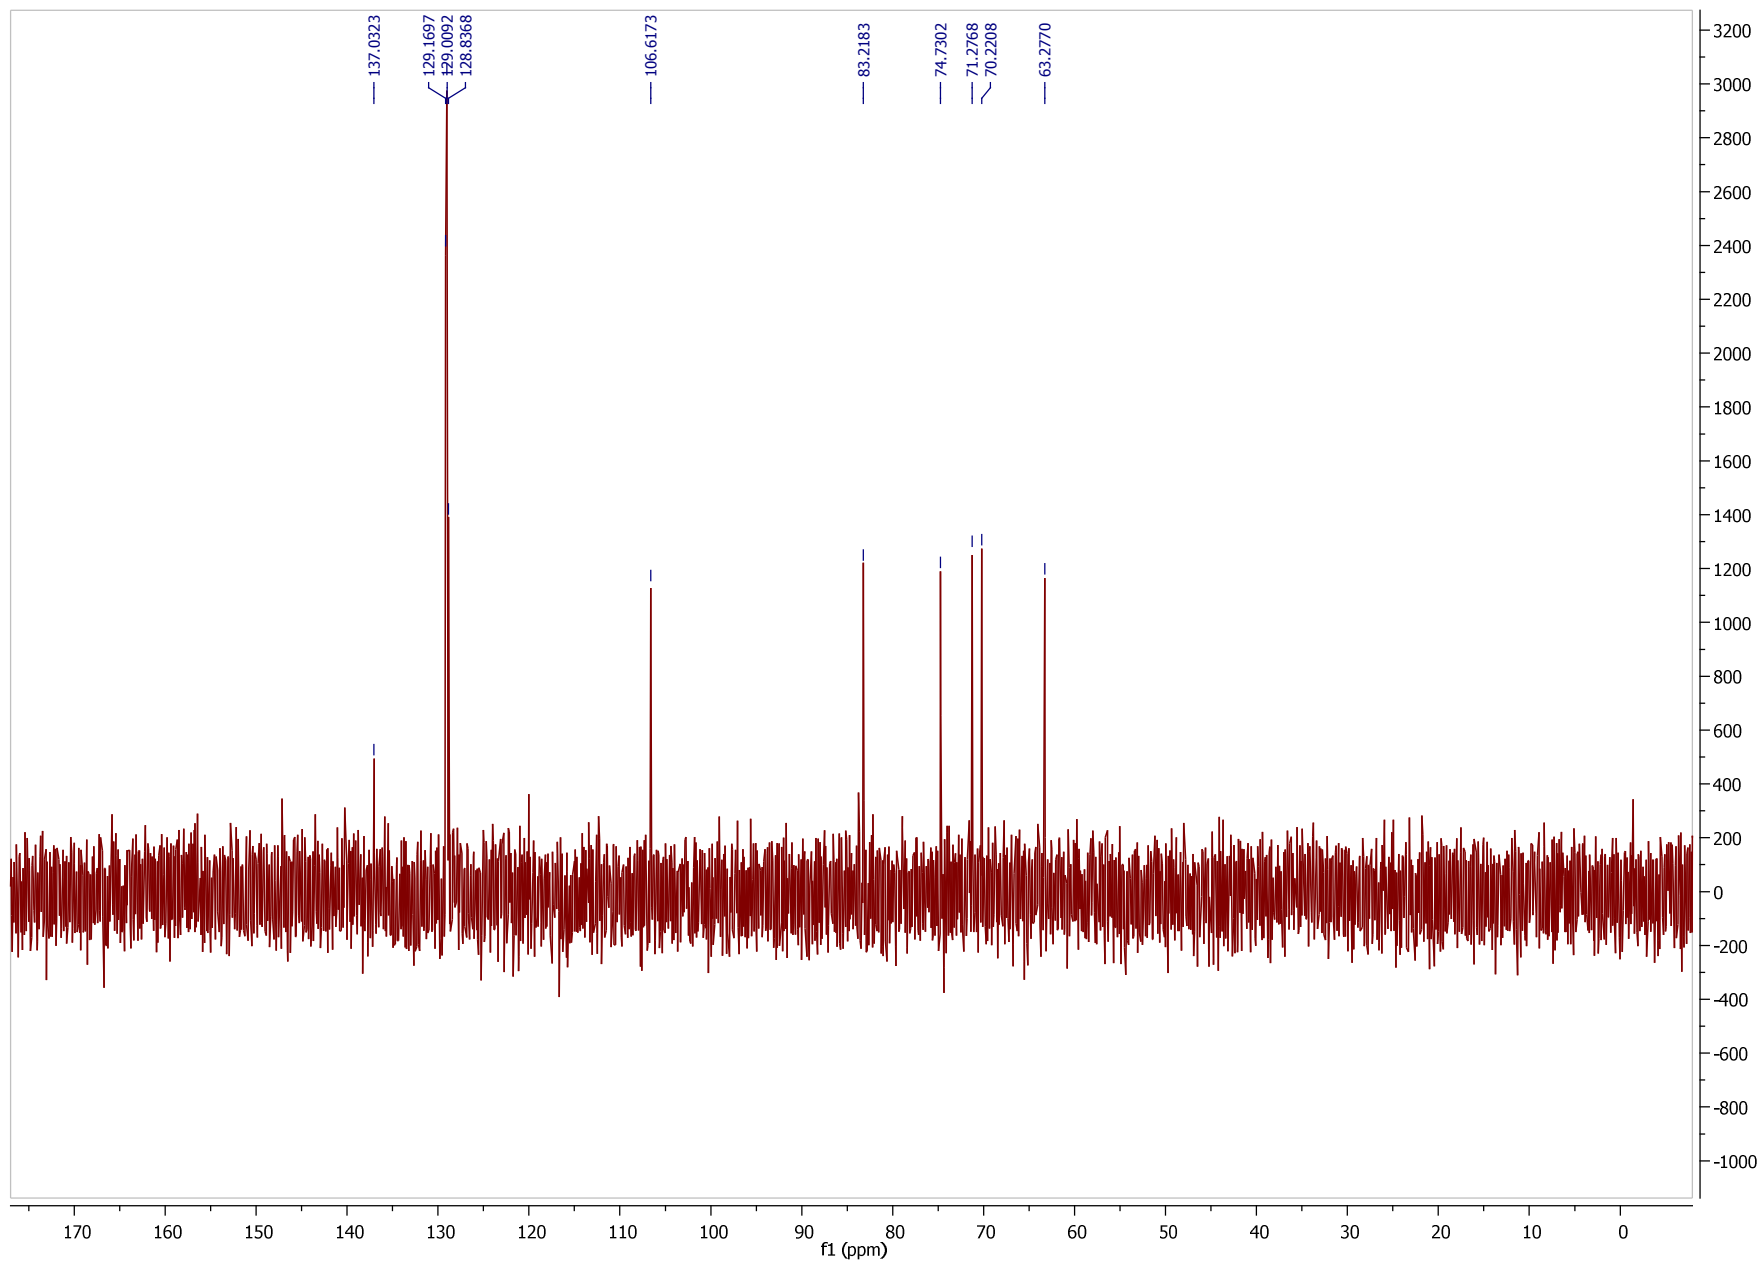

1-O-benzyl-5-O-tert-butylidimethylsilyl-β-D-ribofuranoside **4α**: <sup>1</sup>H-NMR

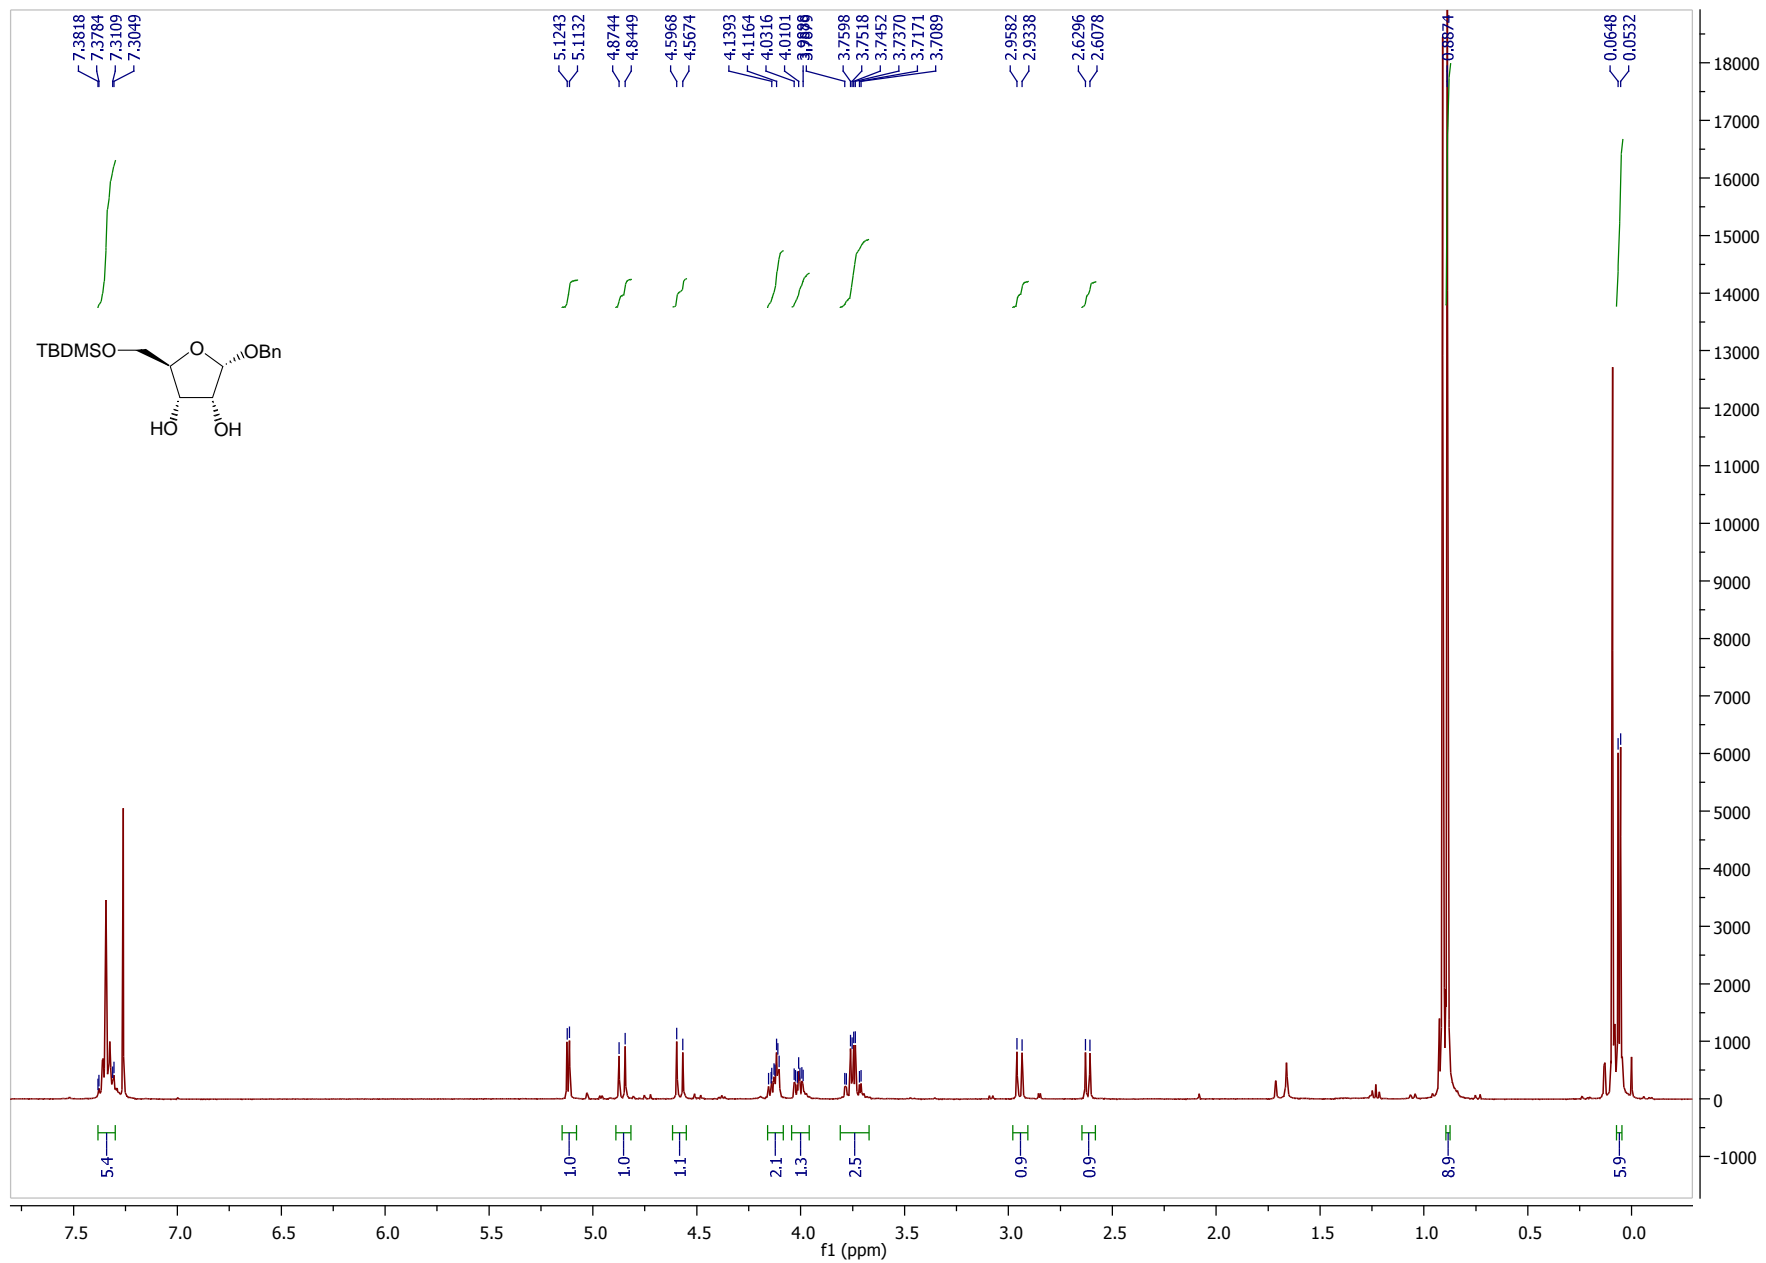

*1-O-benzyl-5-O-tert-butyltrimethylsilyl-β-D-ribofuranoside 4α*: <sup>13</sup>C-NMR

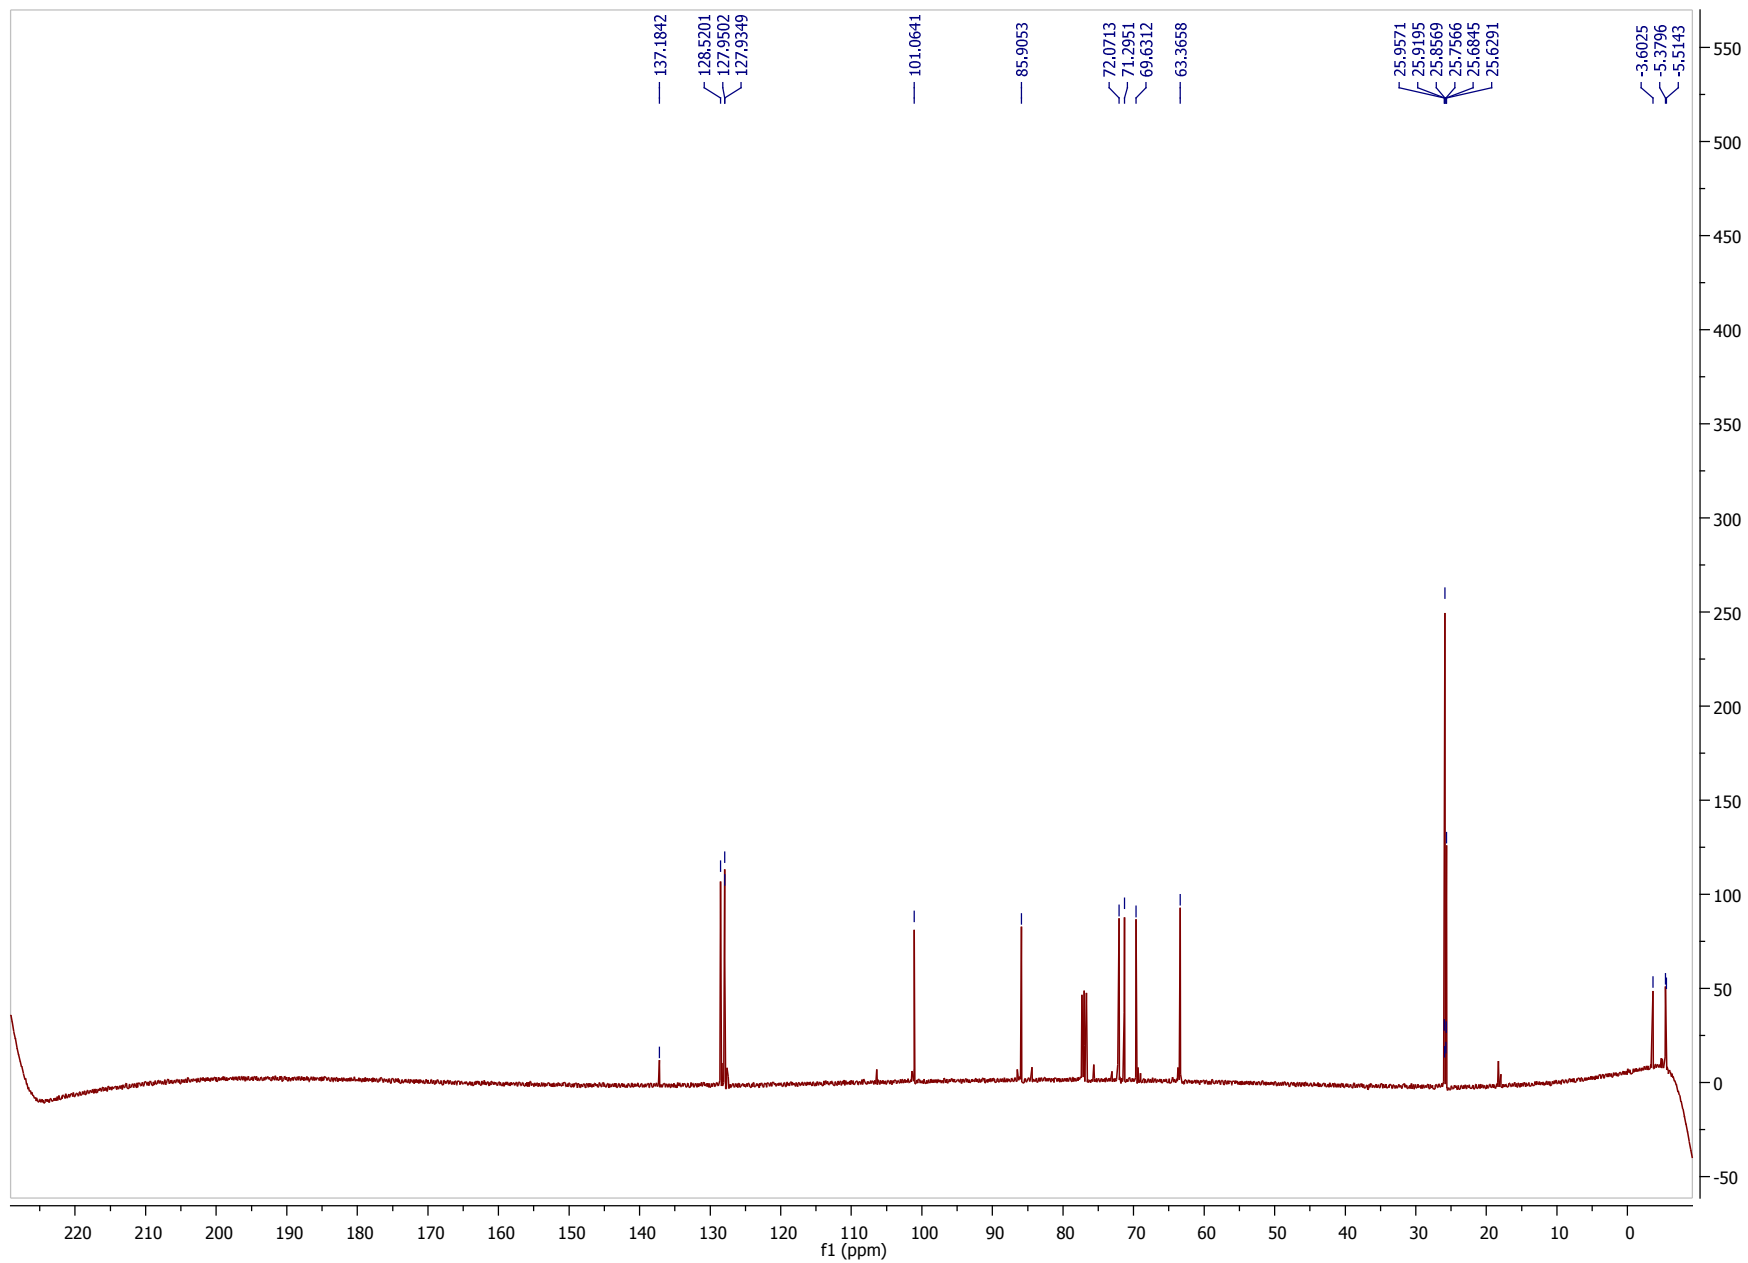



1-O-benzyl-5-O-tert-butylidimethylsilyl- $\beta$ -D-ribofuranoside **4b**:  $^1\text{H-NMR}$

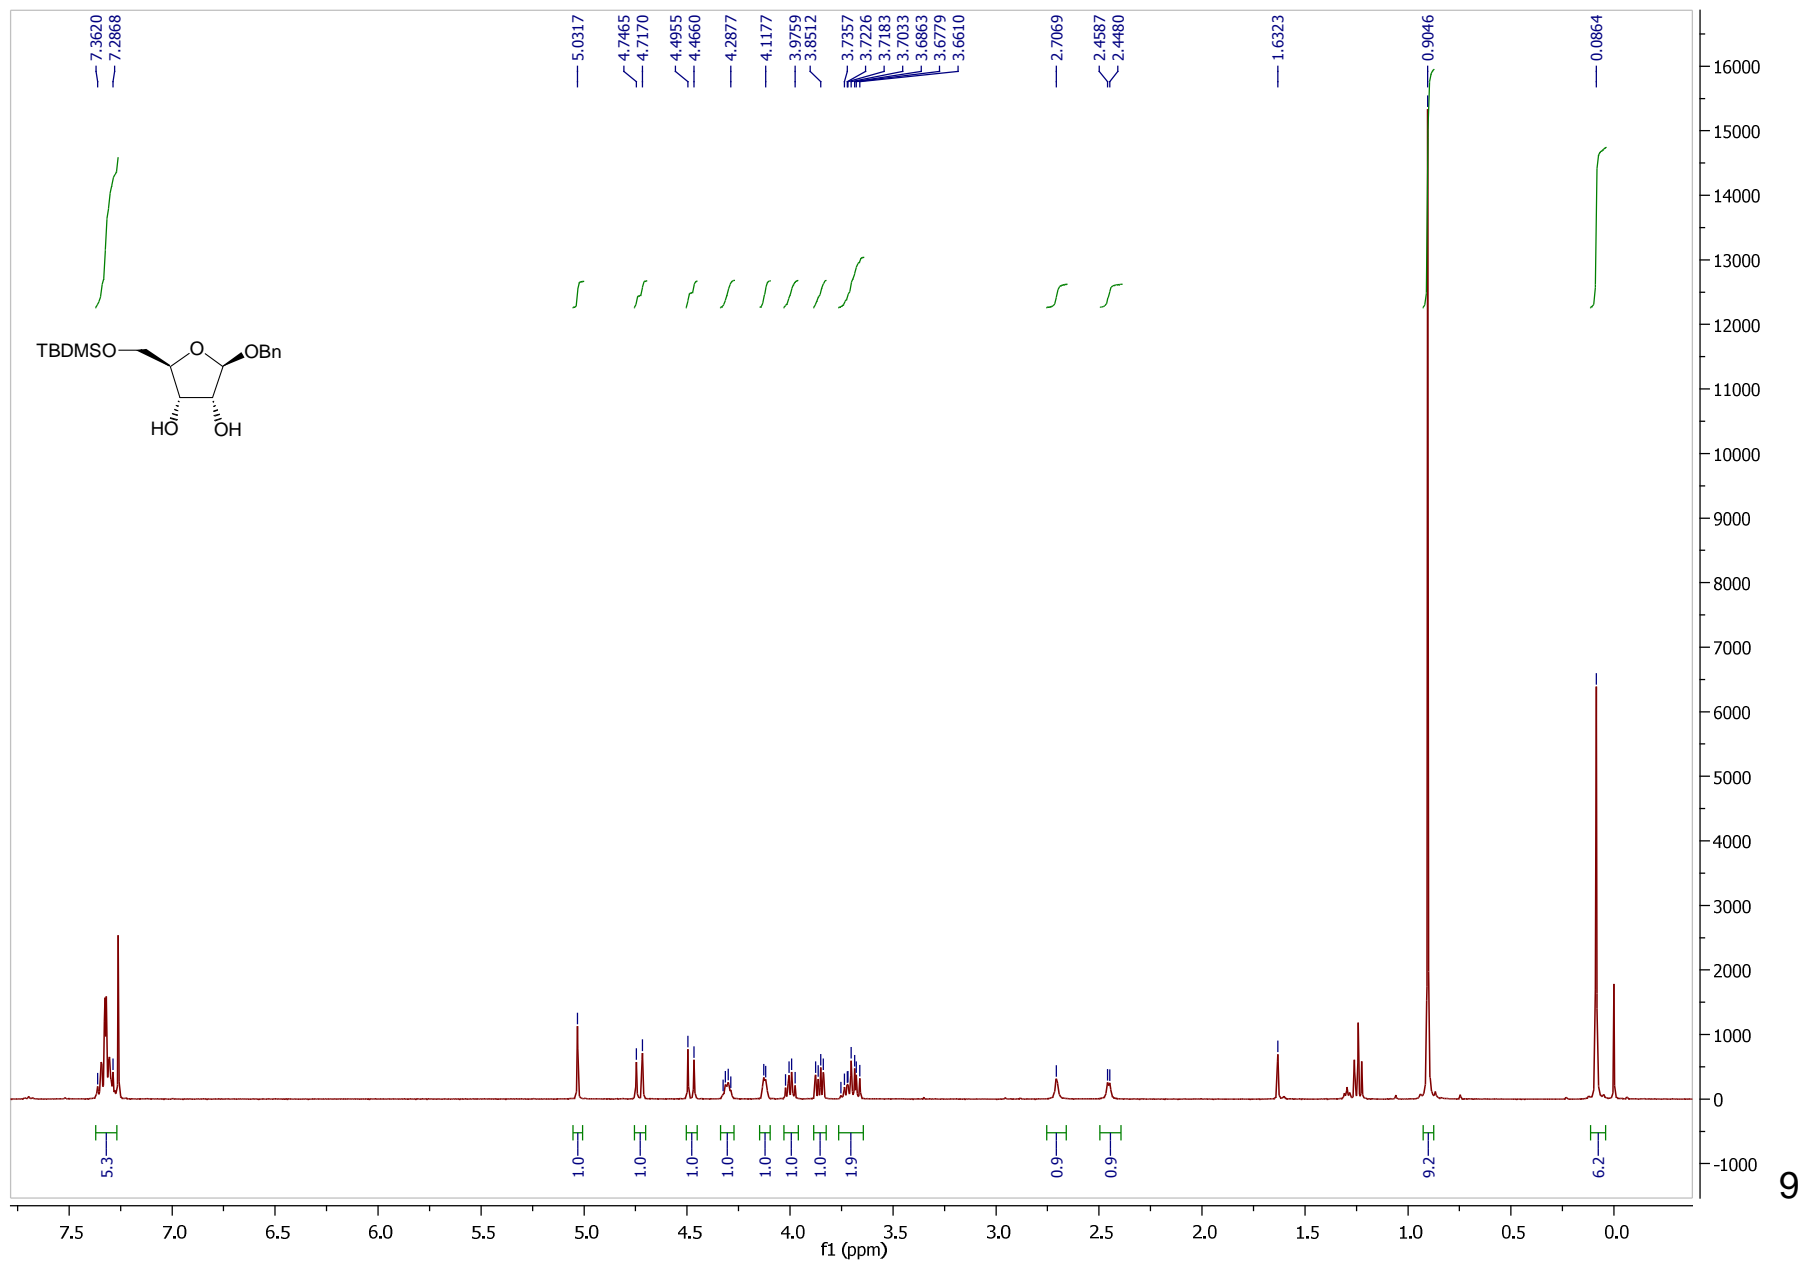

*1-O-benzyl-5-O-tert-butyl*dimethylsilyl- $\beta$ -D-ribofuranoside **4 $\beta$** :  $^{13}\text{C}$ -NMR

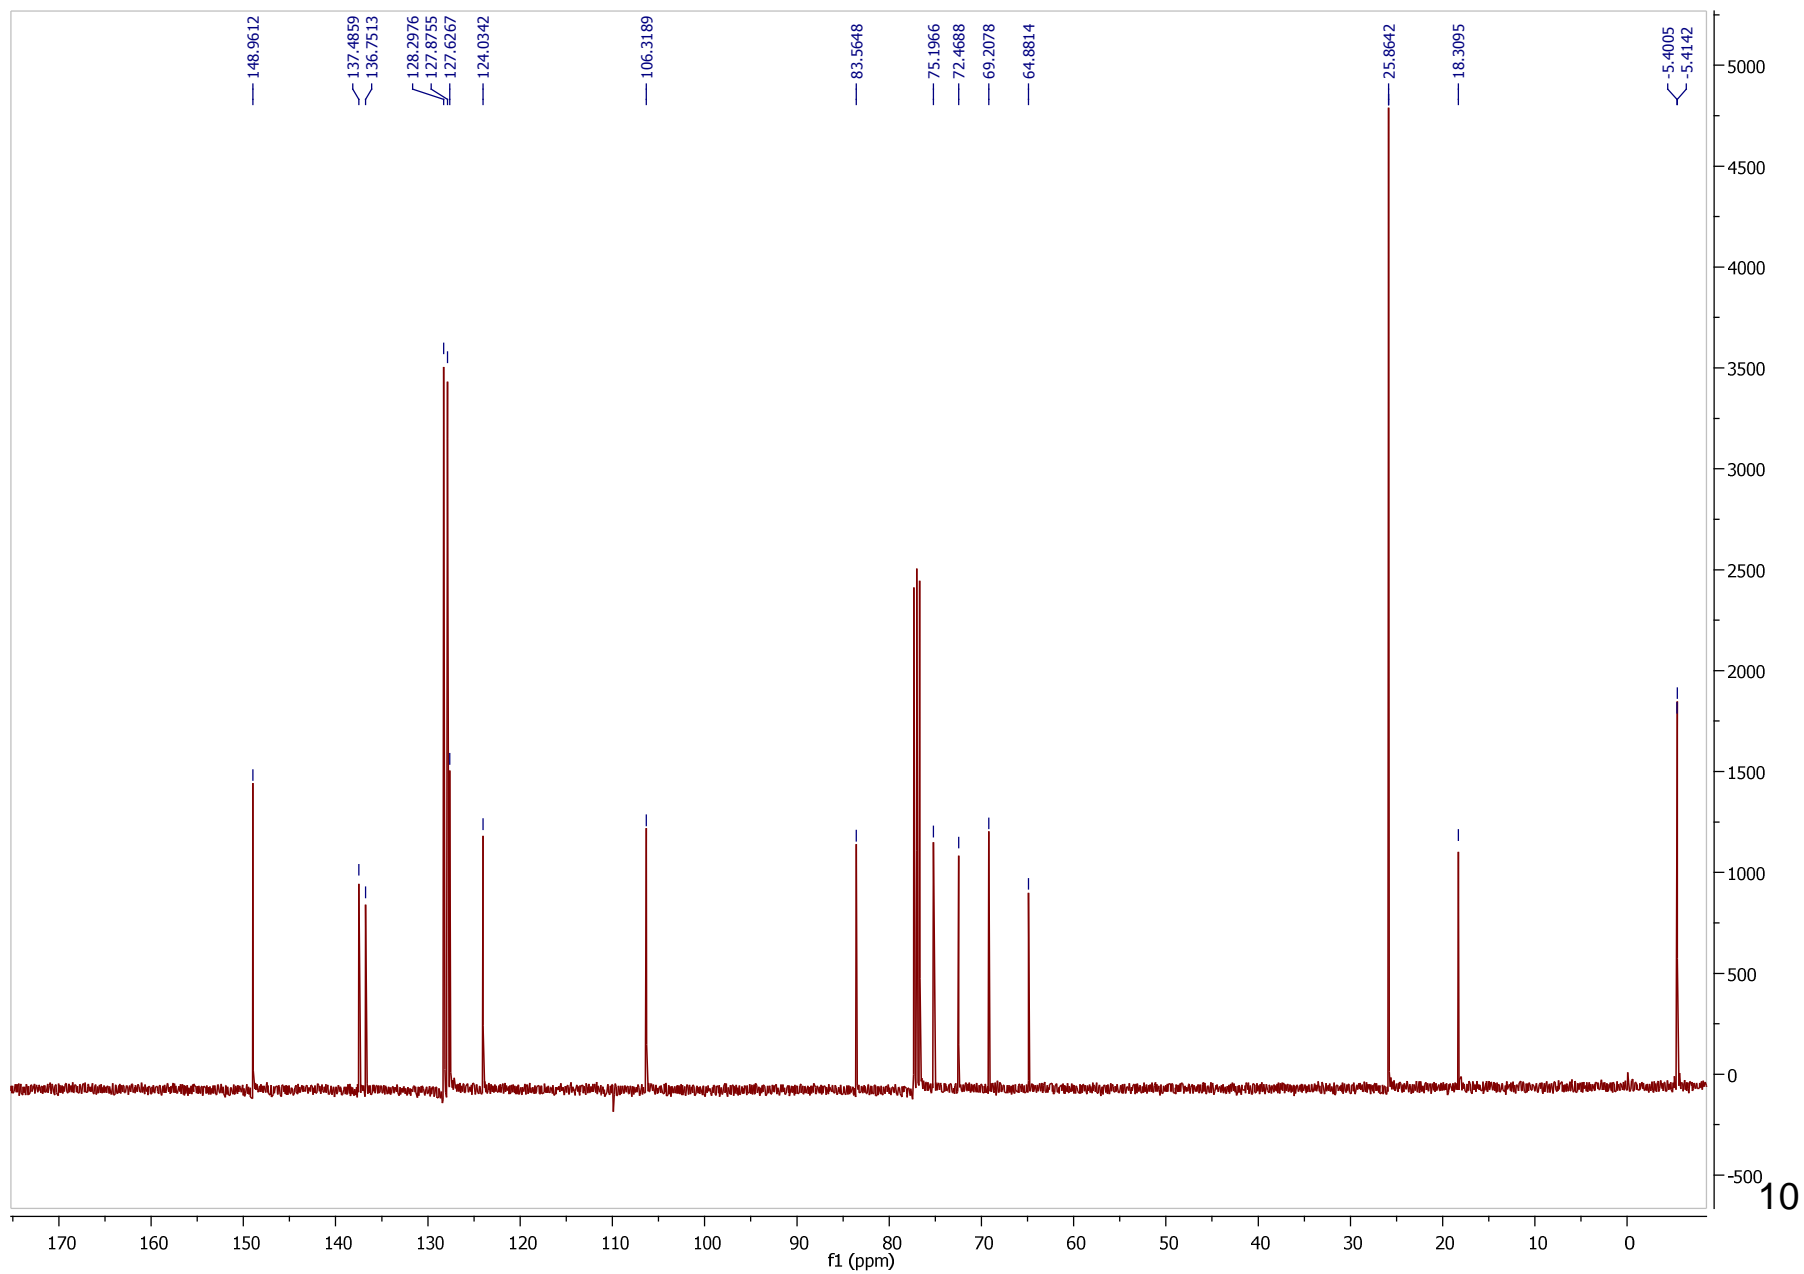

1-O-benzyl-2,3-O-bis(methylcarbonate)-5-O-tert-butyltrimethylsilyl-β-D-ribofuranoside **5a**: <sup>1</sup>H-NMR

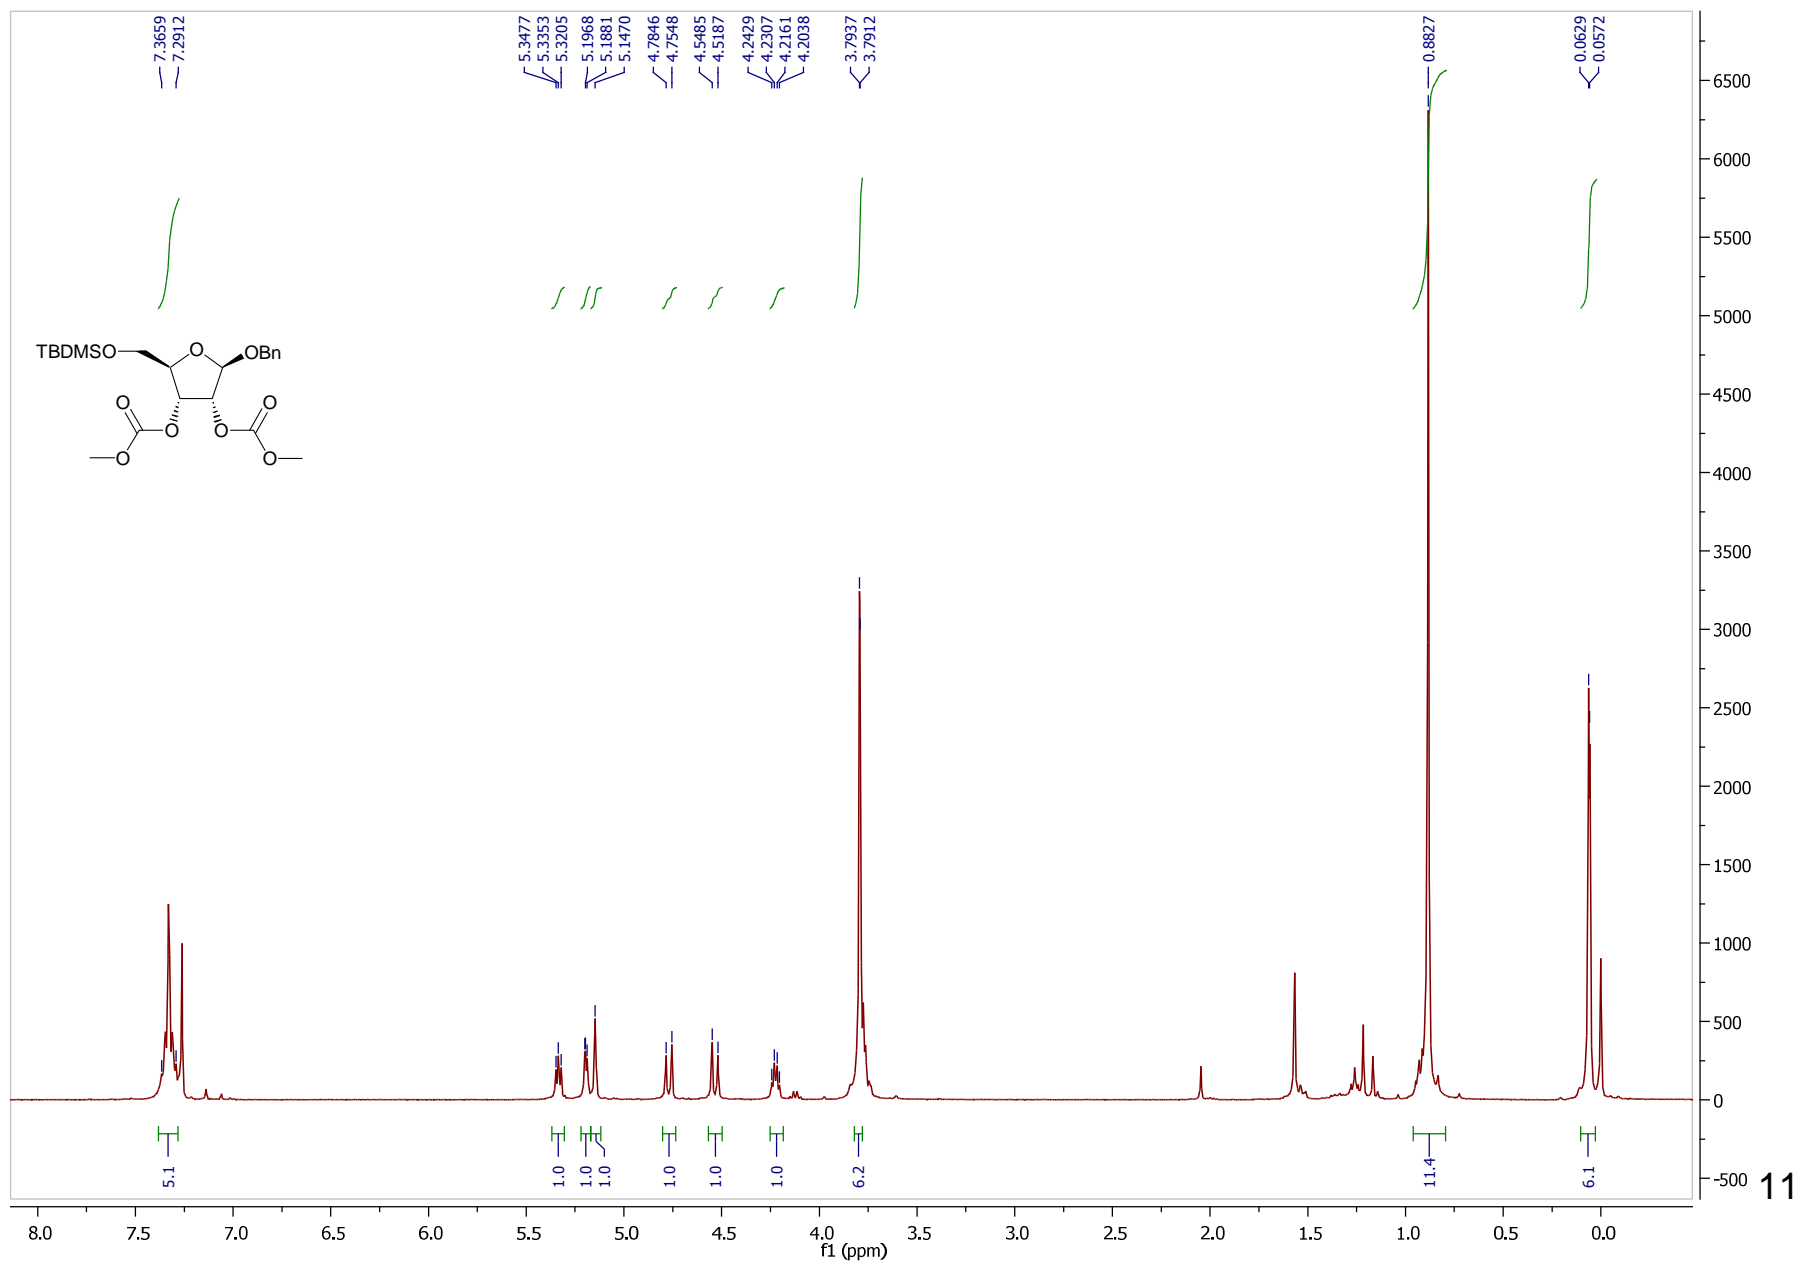

1-O-benzyl-2,3-O-bis(methylcarbonate)-5-O-tert-butyltrimethylsilyl- $\beta$ -D-ribofuranoside **5a**:  $^{13}\text{C}$ -NMR

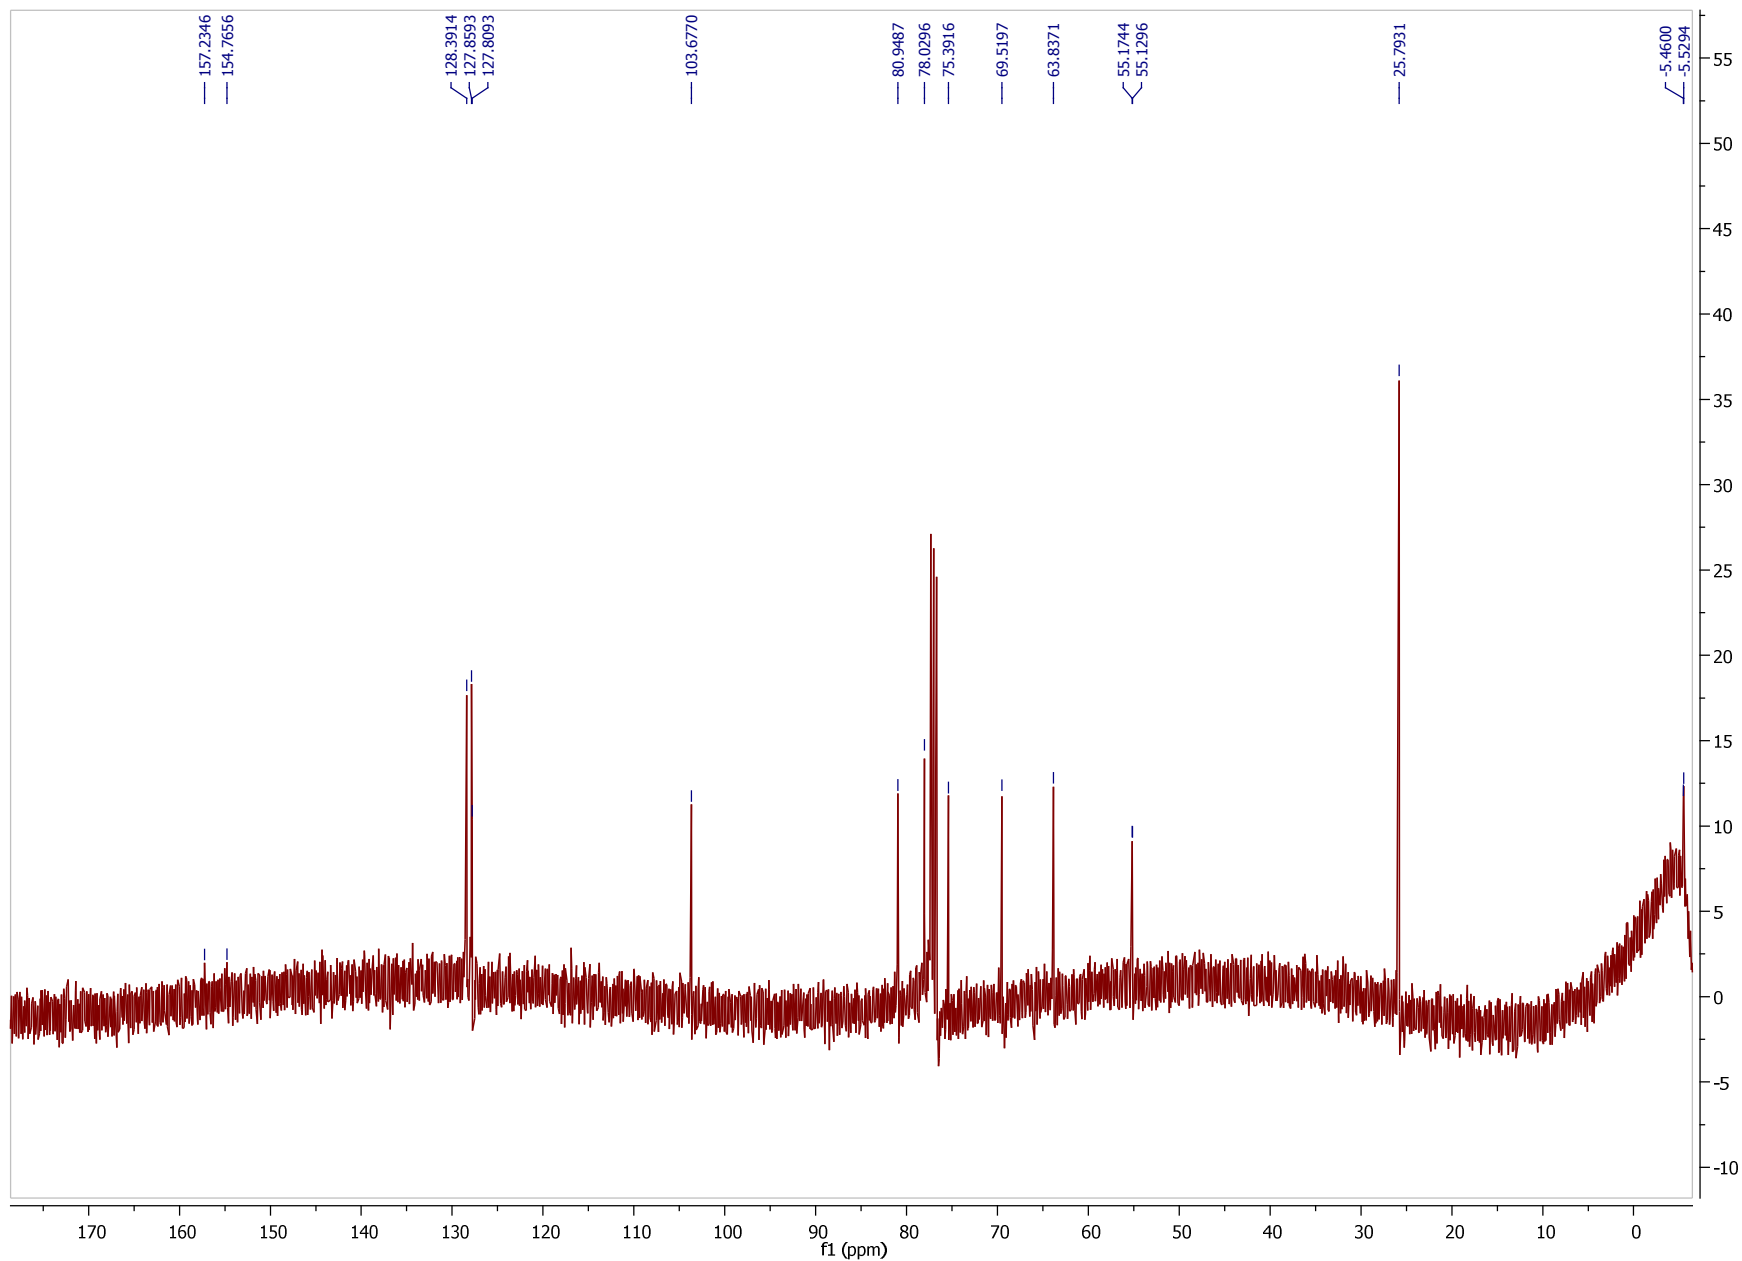

1-O-benzyl-2,3-O-bis(ethylcarbonate)-5-O-tert-butylidimethylsilyl-β-D-ribofuranoside **5b**: <sup>1</sup>H-NMR

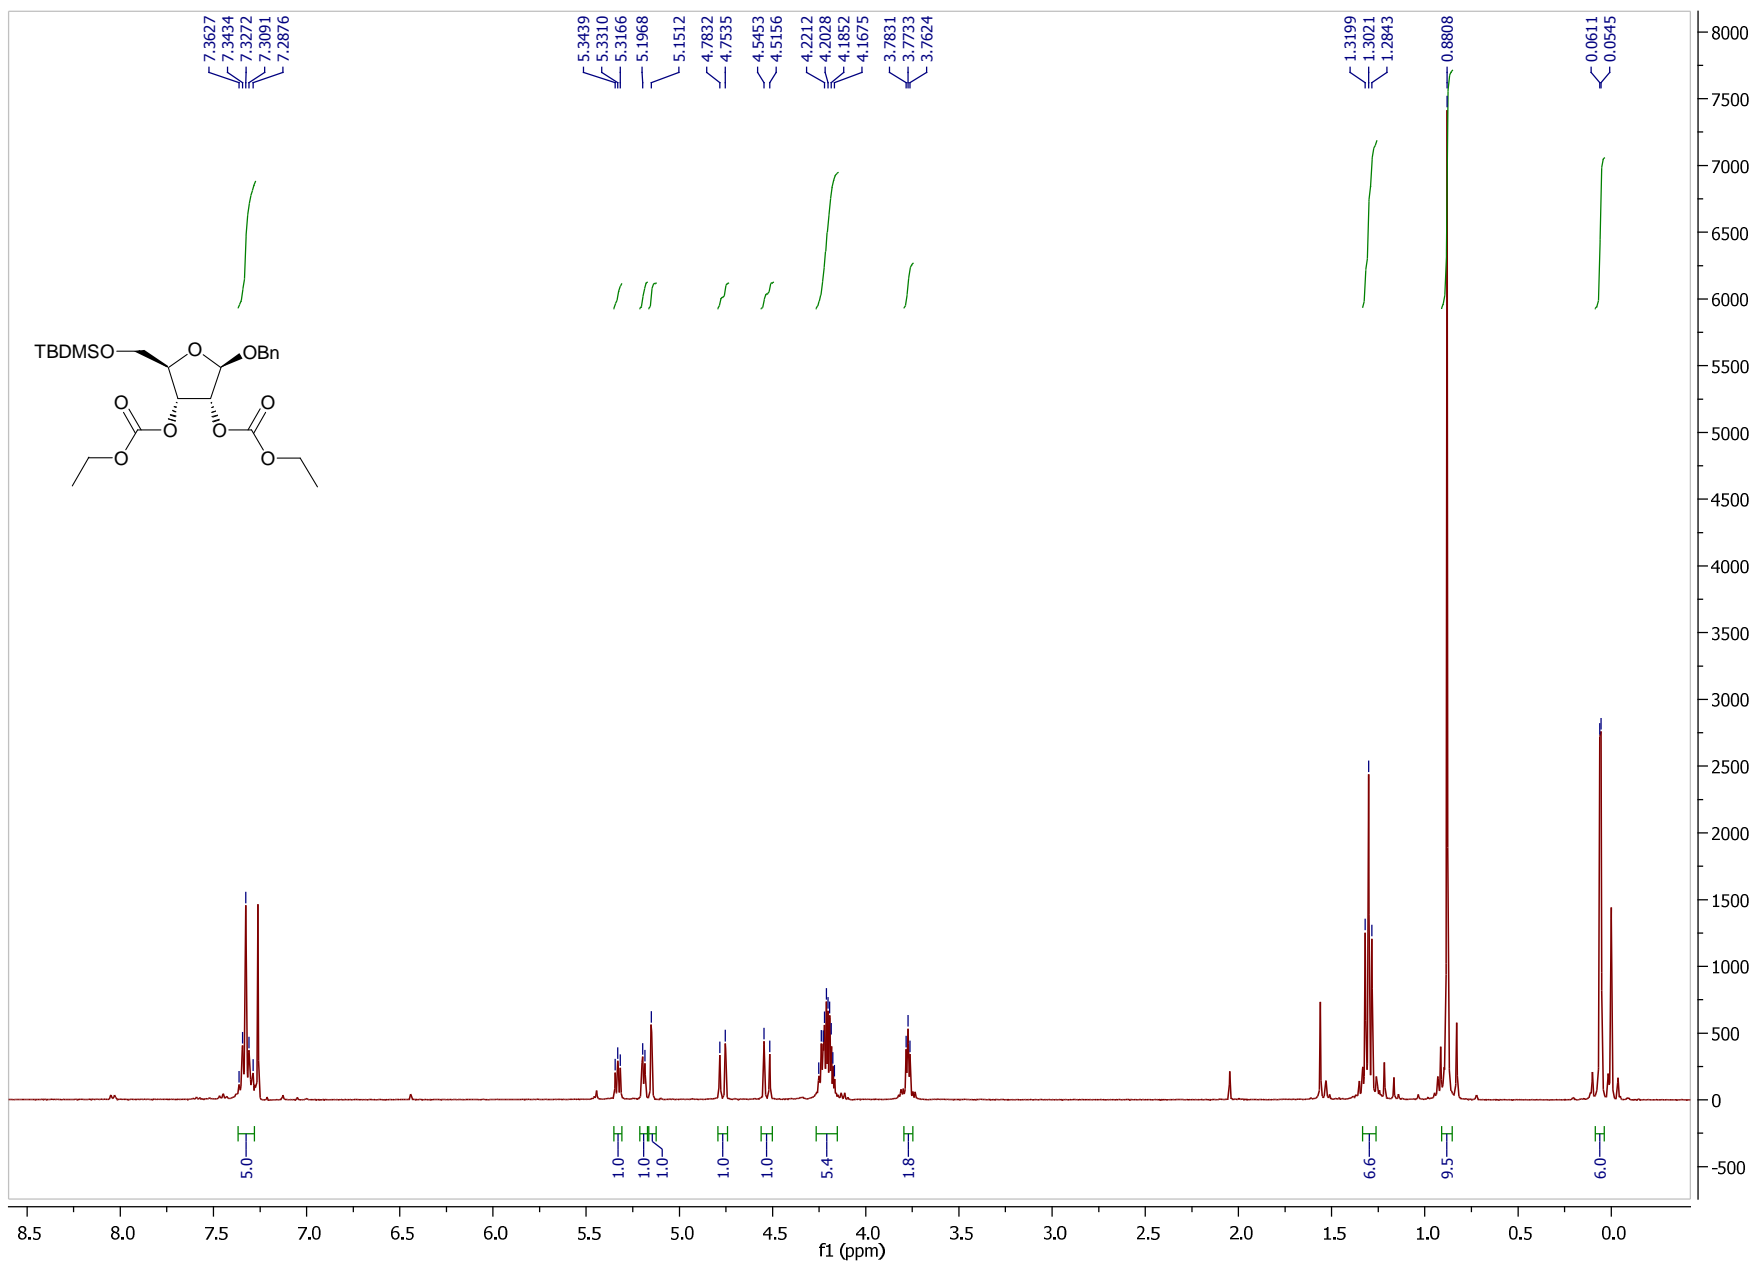

1-O-benzyl-2,3-O-bis(ethylcarbonate)-5-O-tert-butyltrimethylsilyl- $\beta$ -D-ribofuranoside **5b**:  $^{13}\text{C}$ -NMR

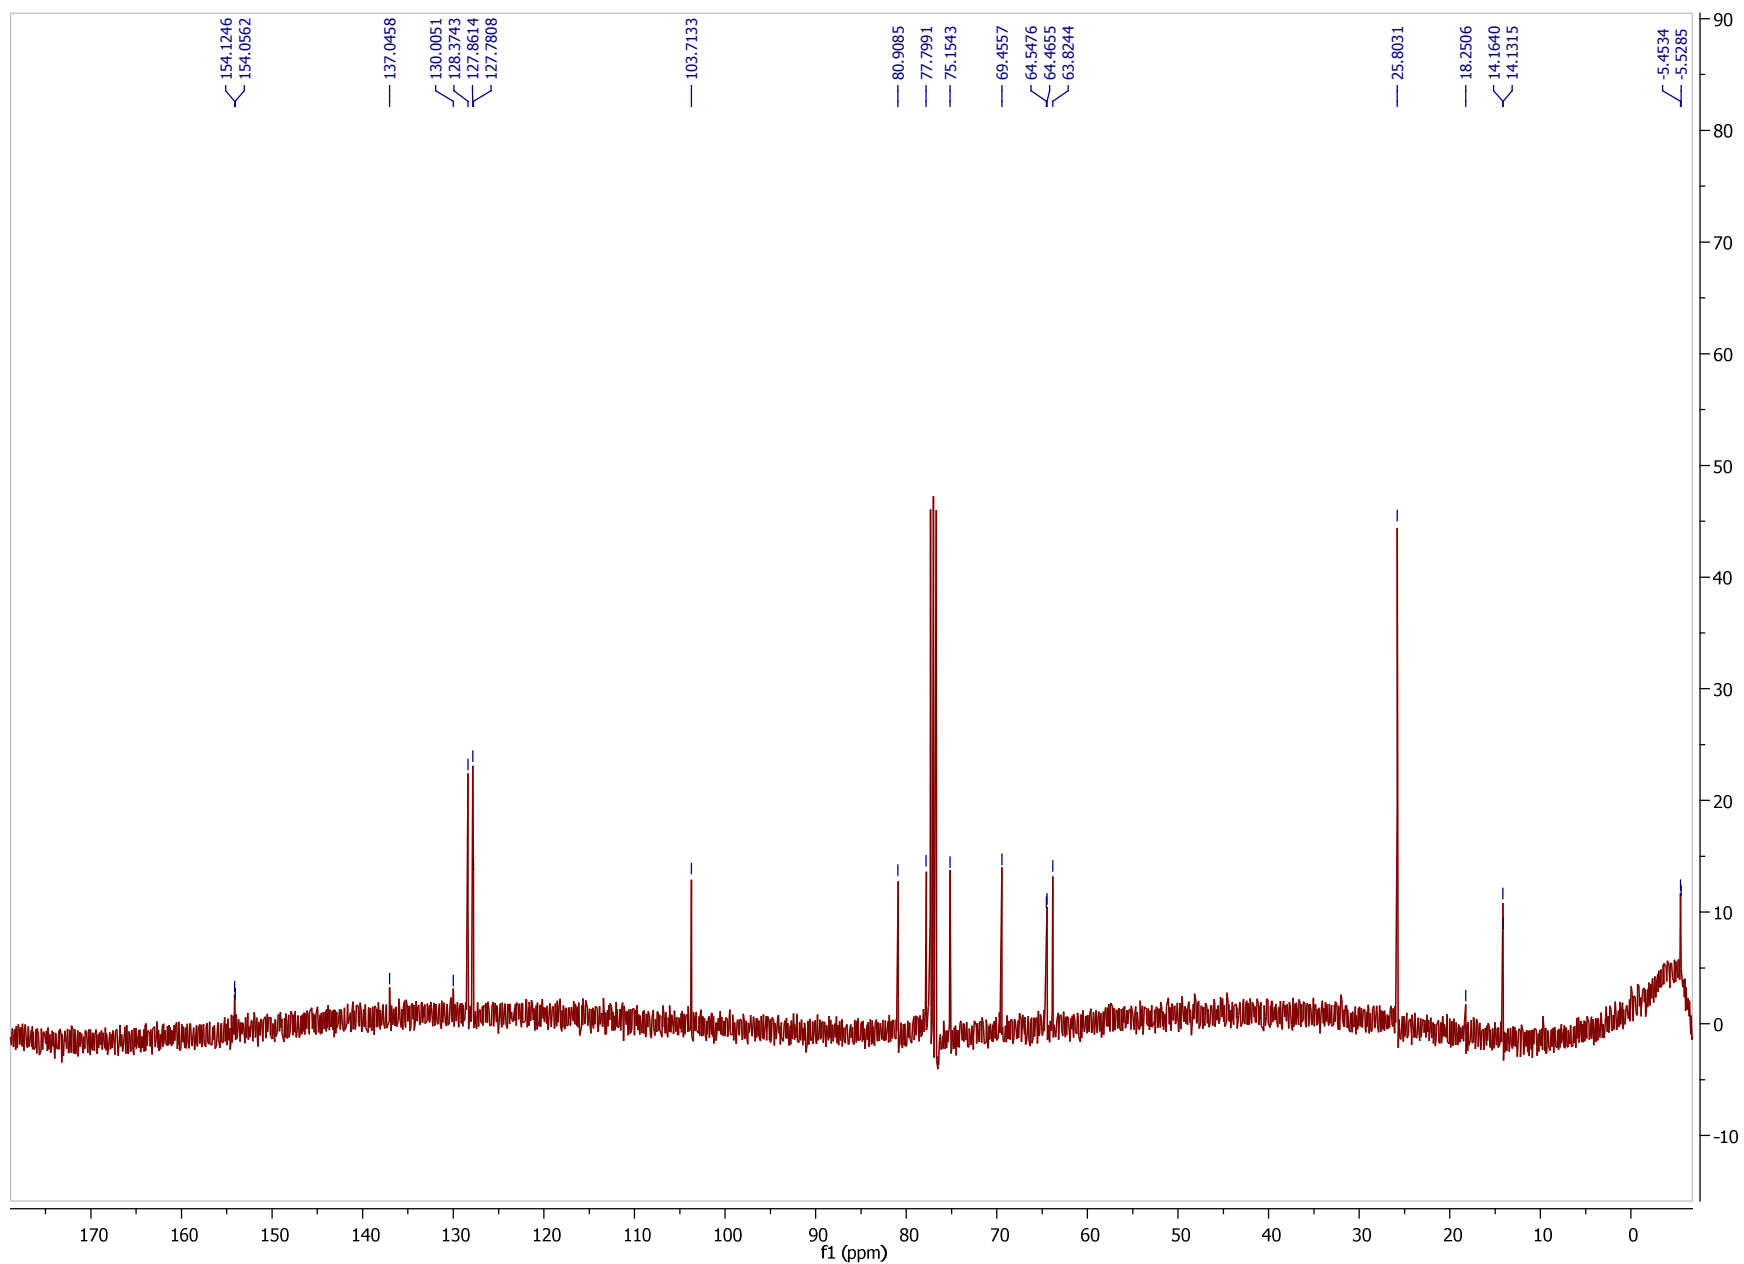

1-O-benzyl-2,3-O-bis(isobutylcarbonate)-5-O-tert-butylidimethylsilyl-β-D-ribofuranoside **5c**: <sup>1</sup>H-NMR

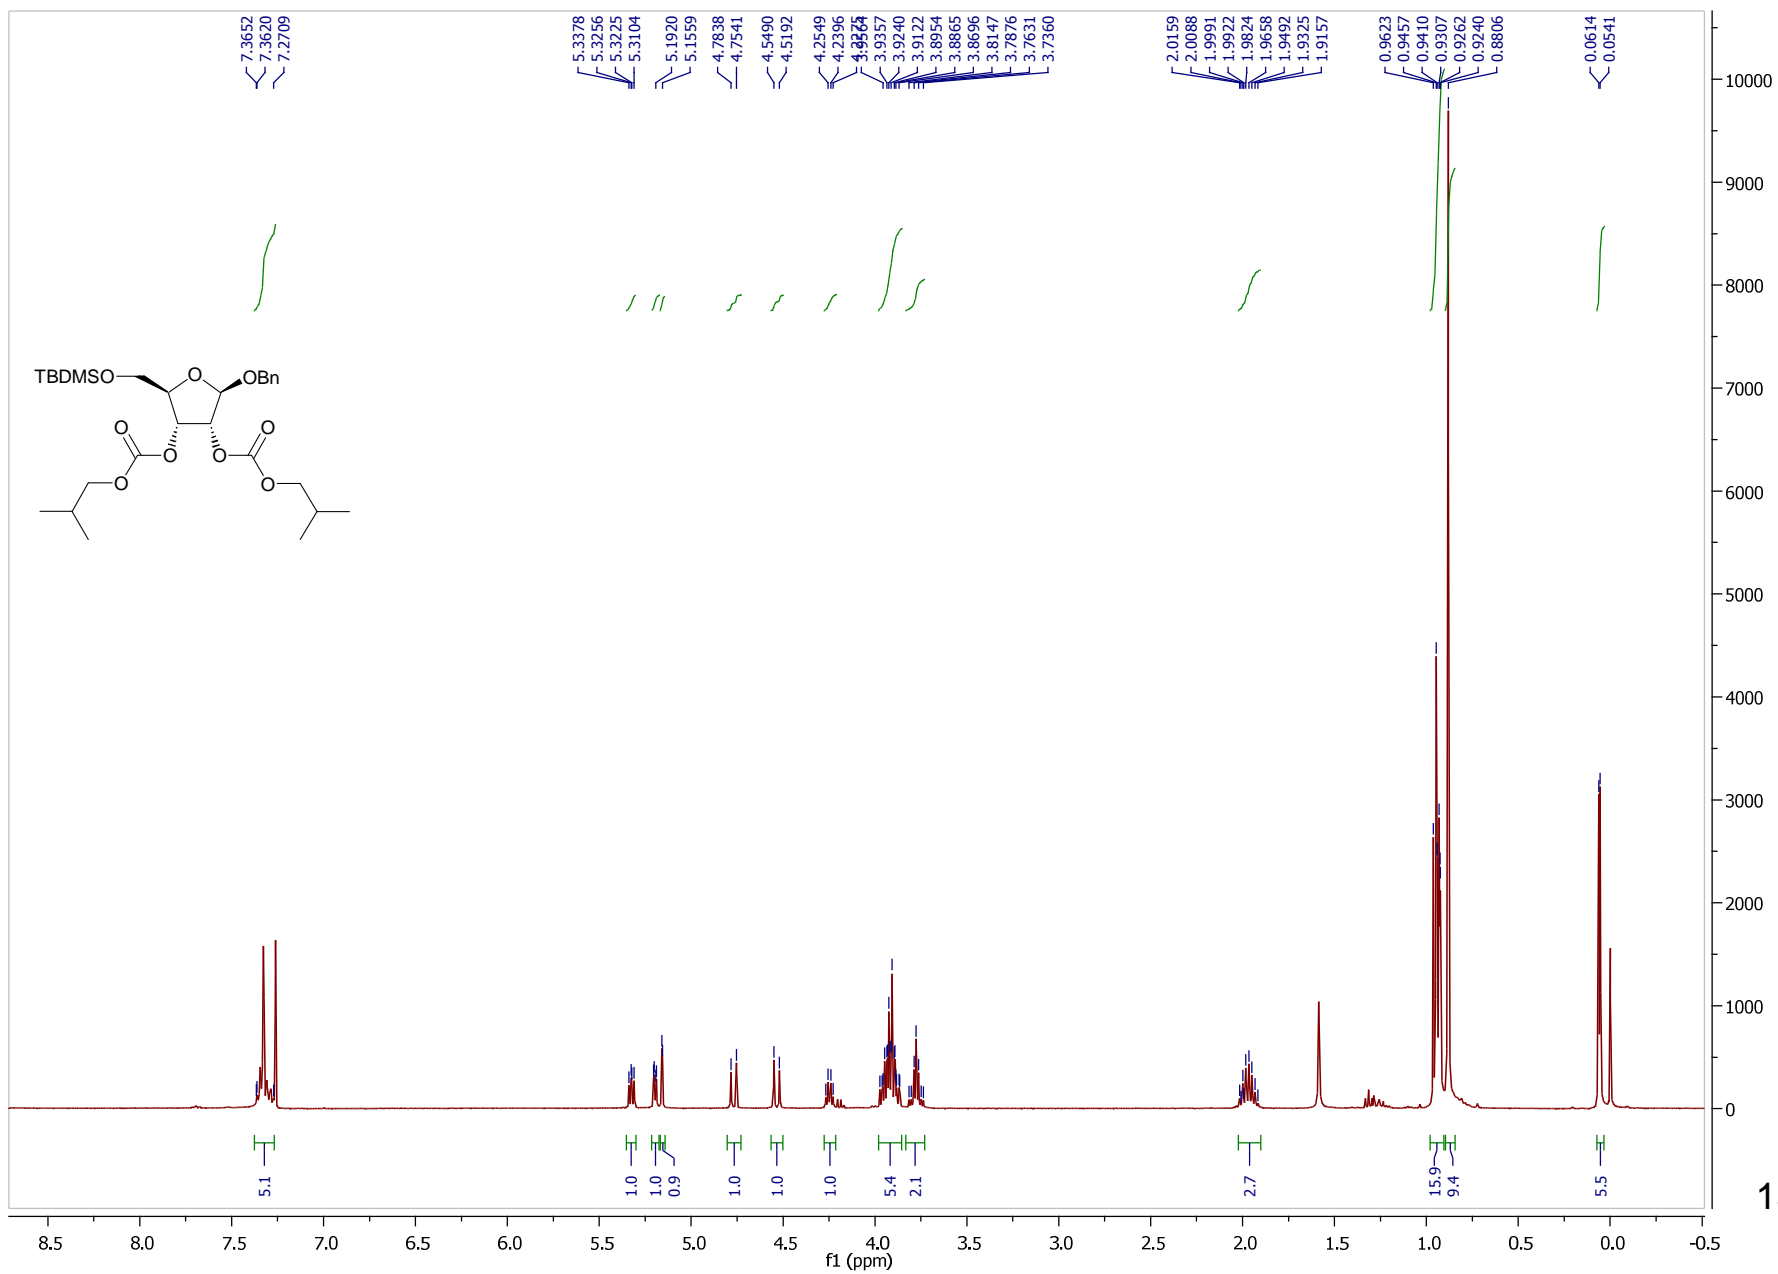

1-O-benzyl-2,3-O-bis(isobutylcarbonate)-5-O-tert-butyltrimethylsilyl-β-D-ribofuranoside **5c**: <sup>13</sup>C-NMR

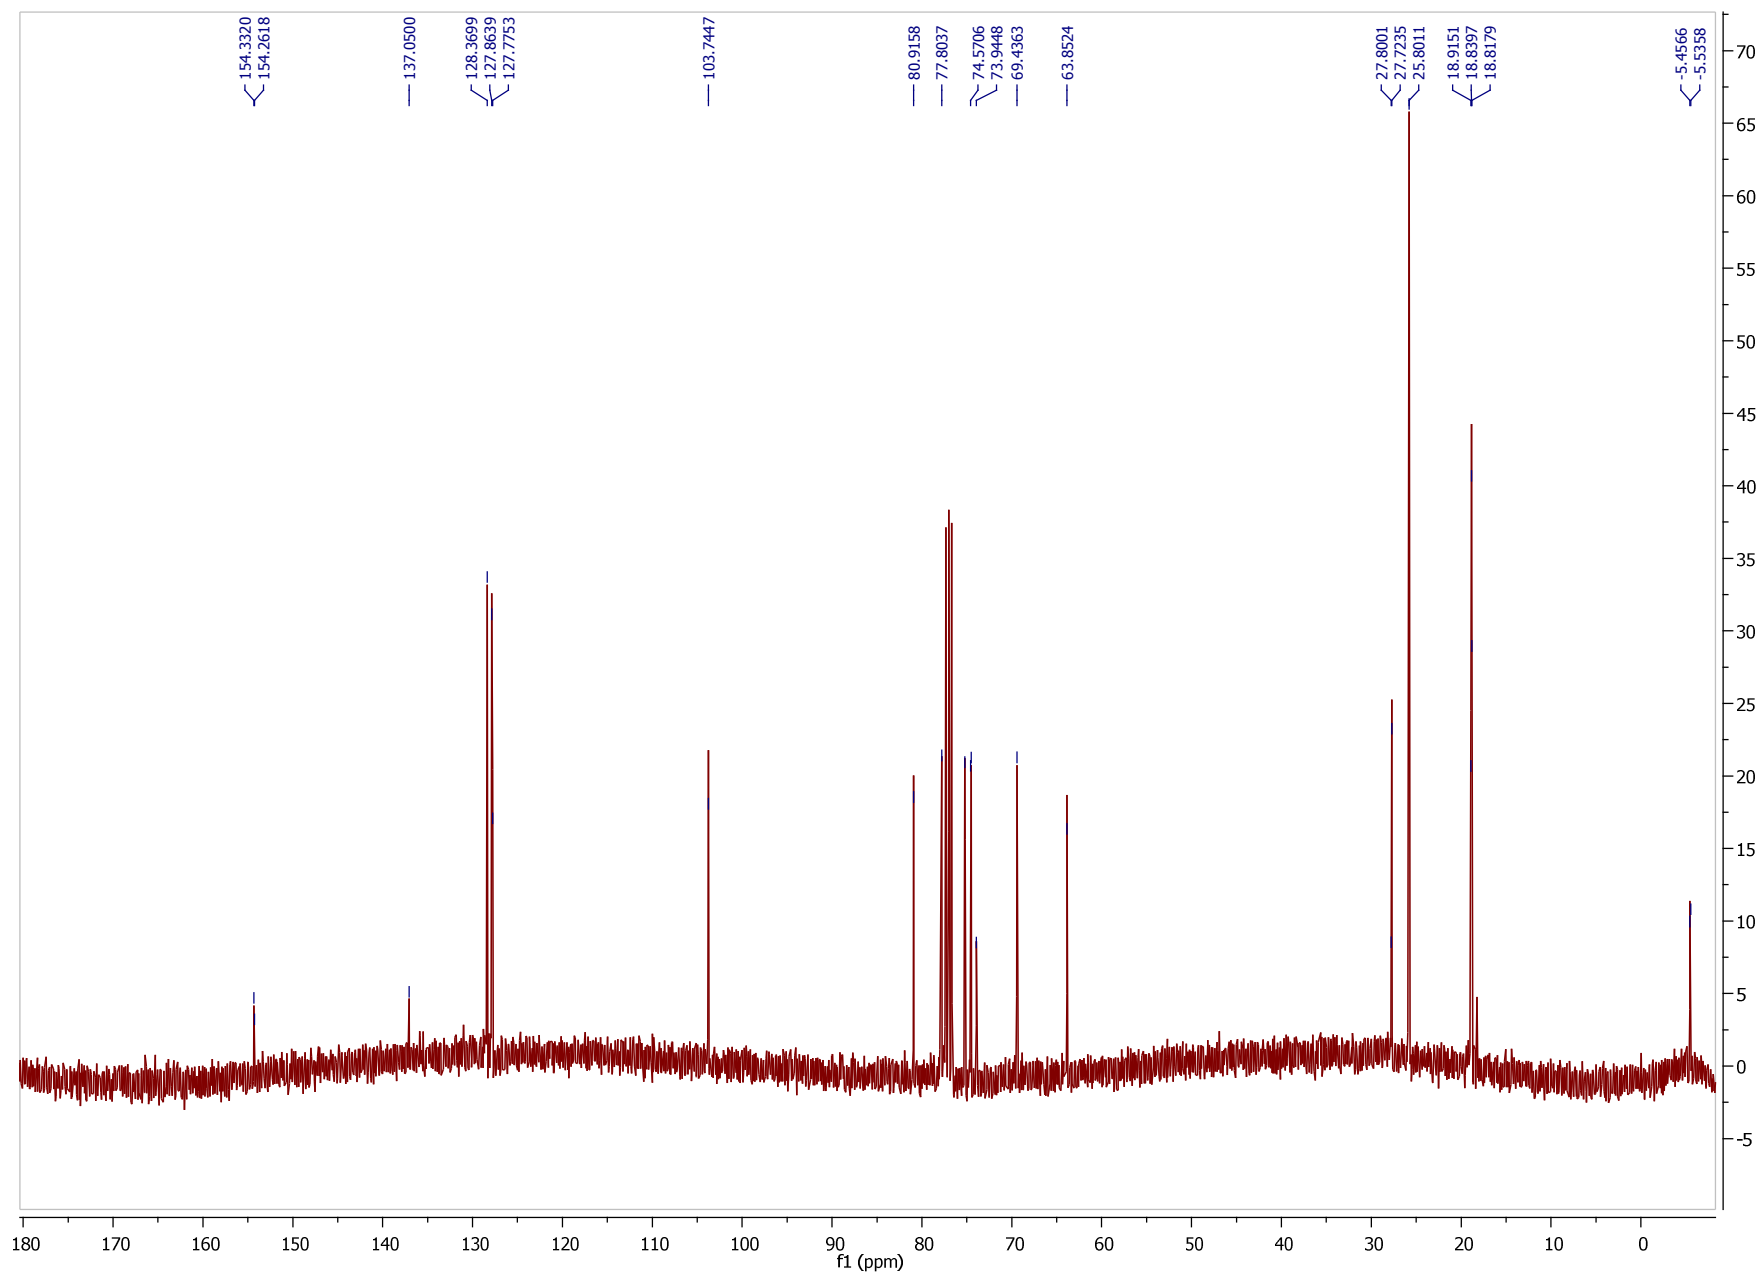



1-O-benzyl-2,3-O-carbonate-5-O-tert-butyl(dimethyl)silyl- $\beta$ -D-ribofuranoside **5d**:  $^1\text{H-NMR}$

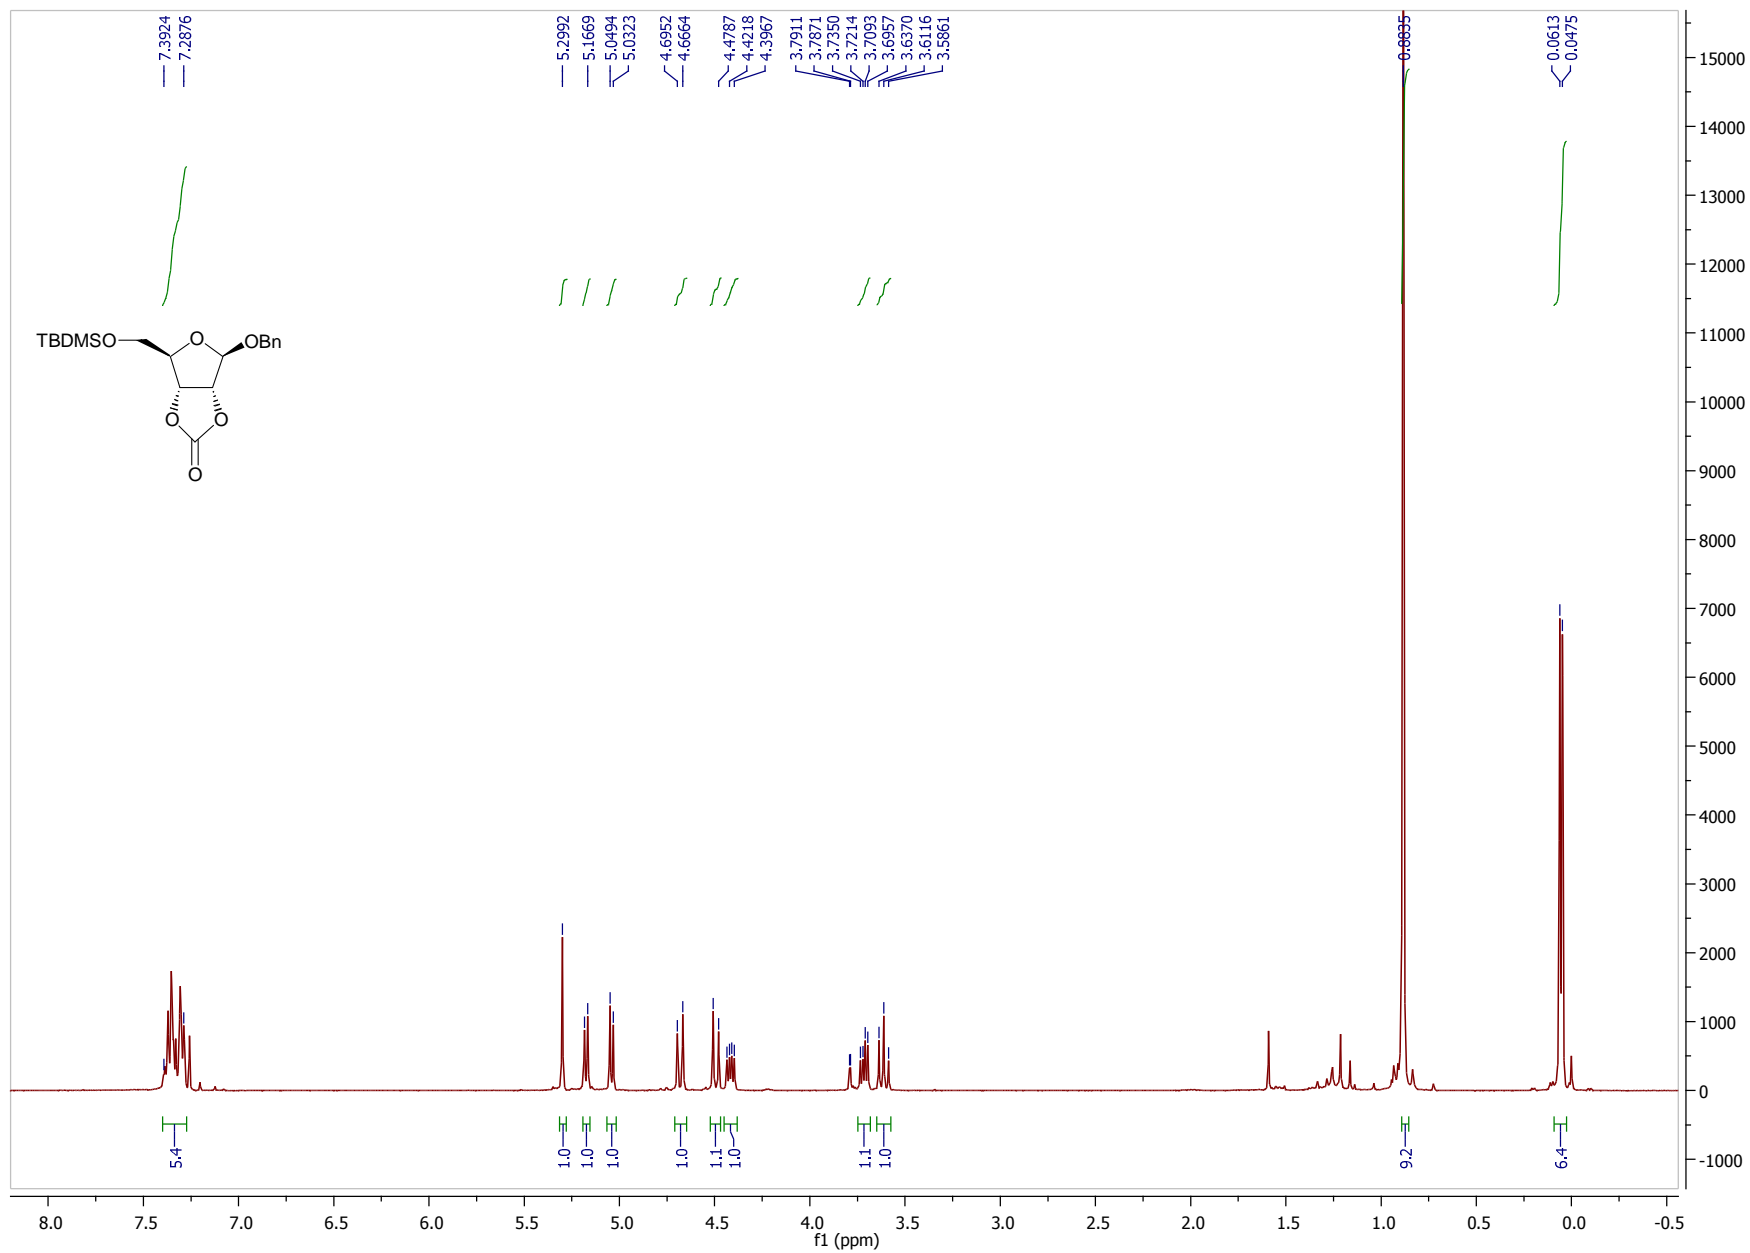

1-O-benzyl-2,3-O-carbonate-5-O-tert-butyltrimethylsilyl- $\beta$ -D-ribofuranoside **5d**:  $^{13}\text{C}$ -NMR

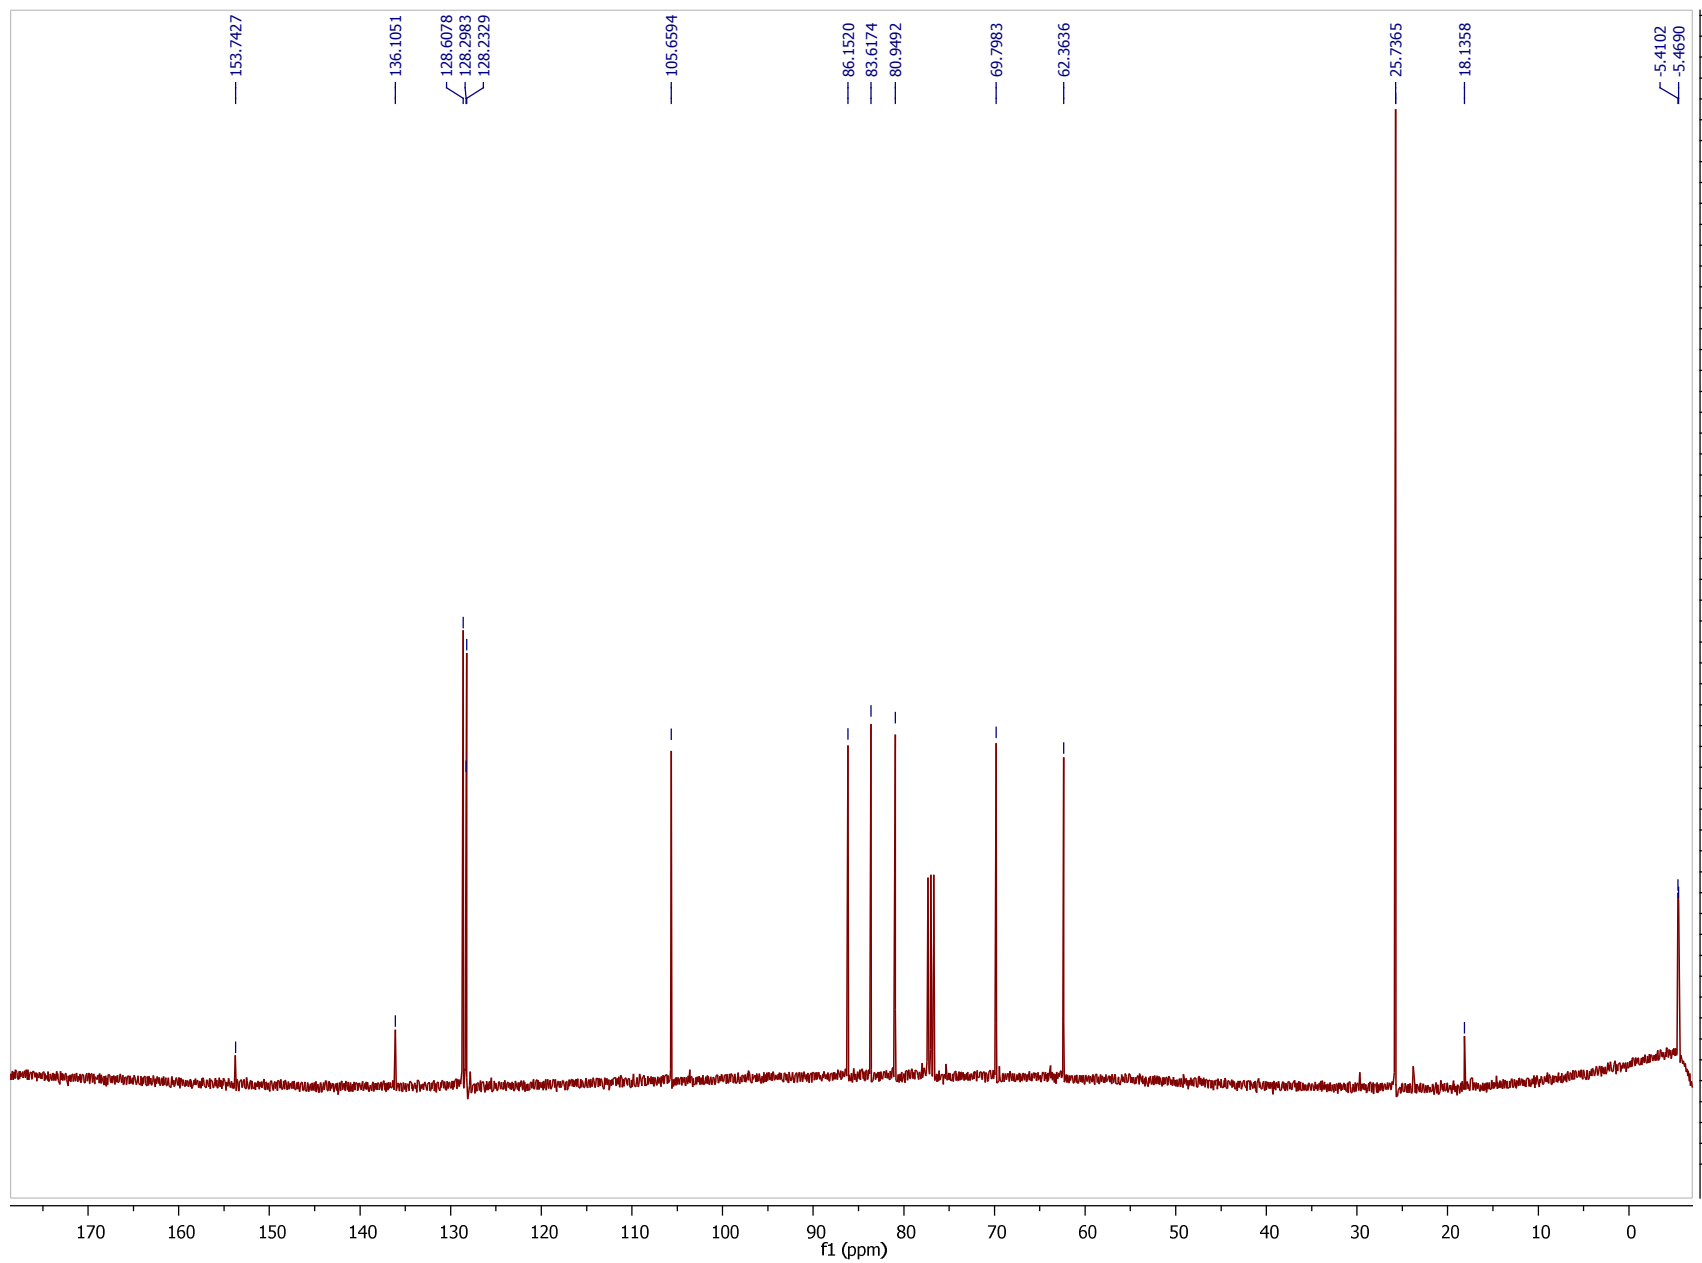

1-O-benzyl-2,3-O-bis(methylcarbonate)- $\beta$ -D-ribofuranoside **7a**:  $^1\text{H-NMR}$

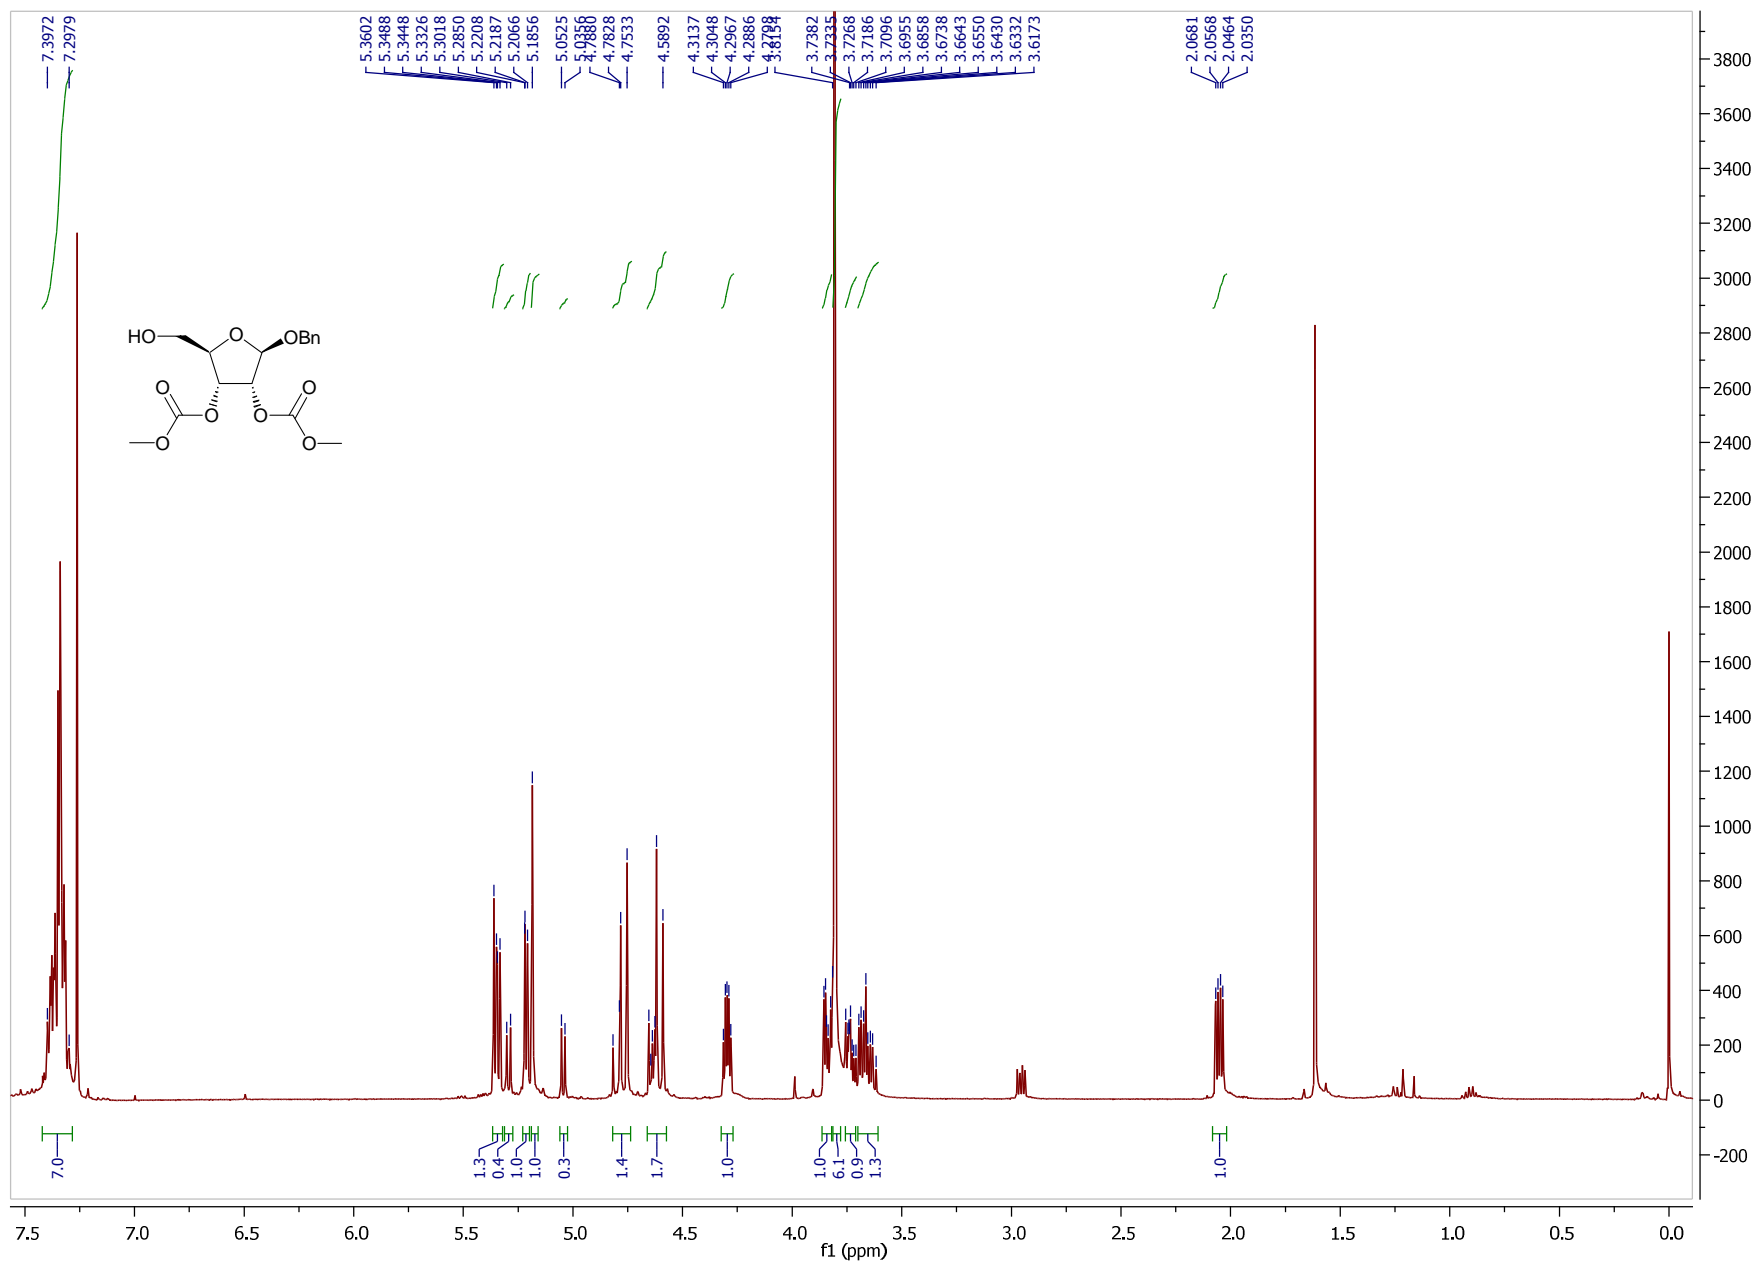

1-O-benzyl-2,3-O-bis(methylcarbonate)- $\beta$ -D-ribofuranoside **7a**:  $^{13}\text{C}$ -NMR

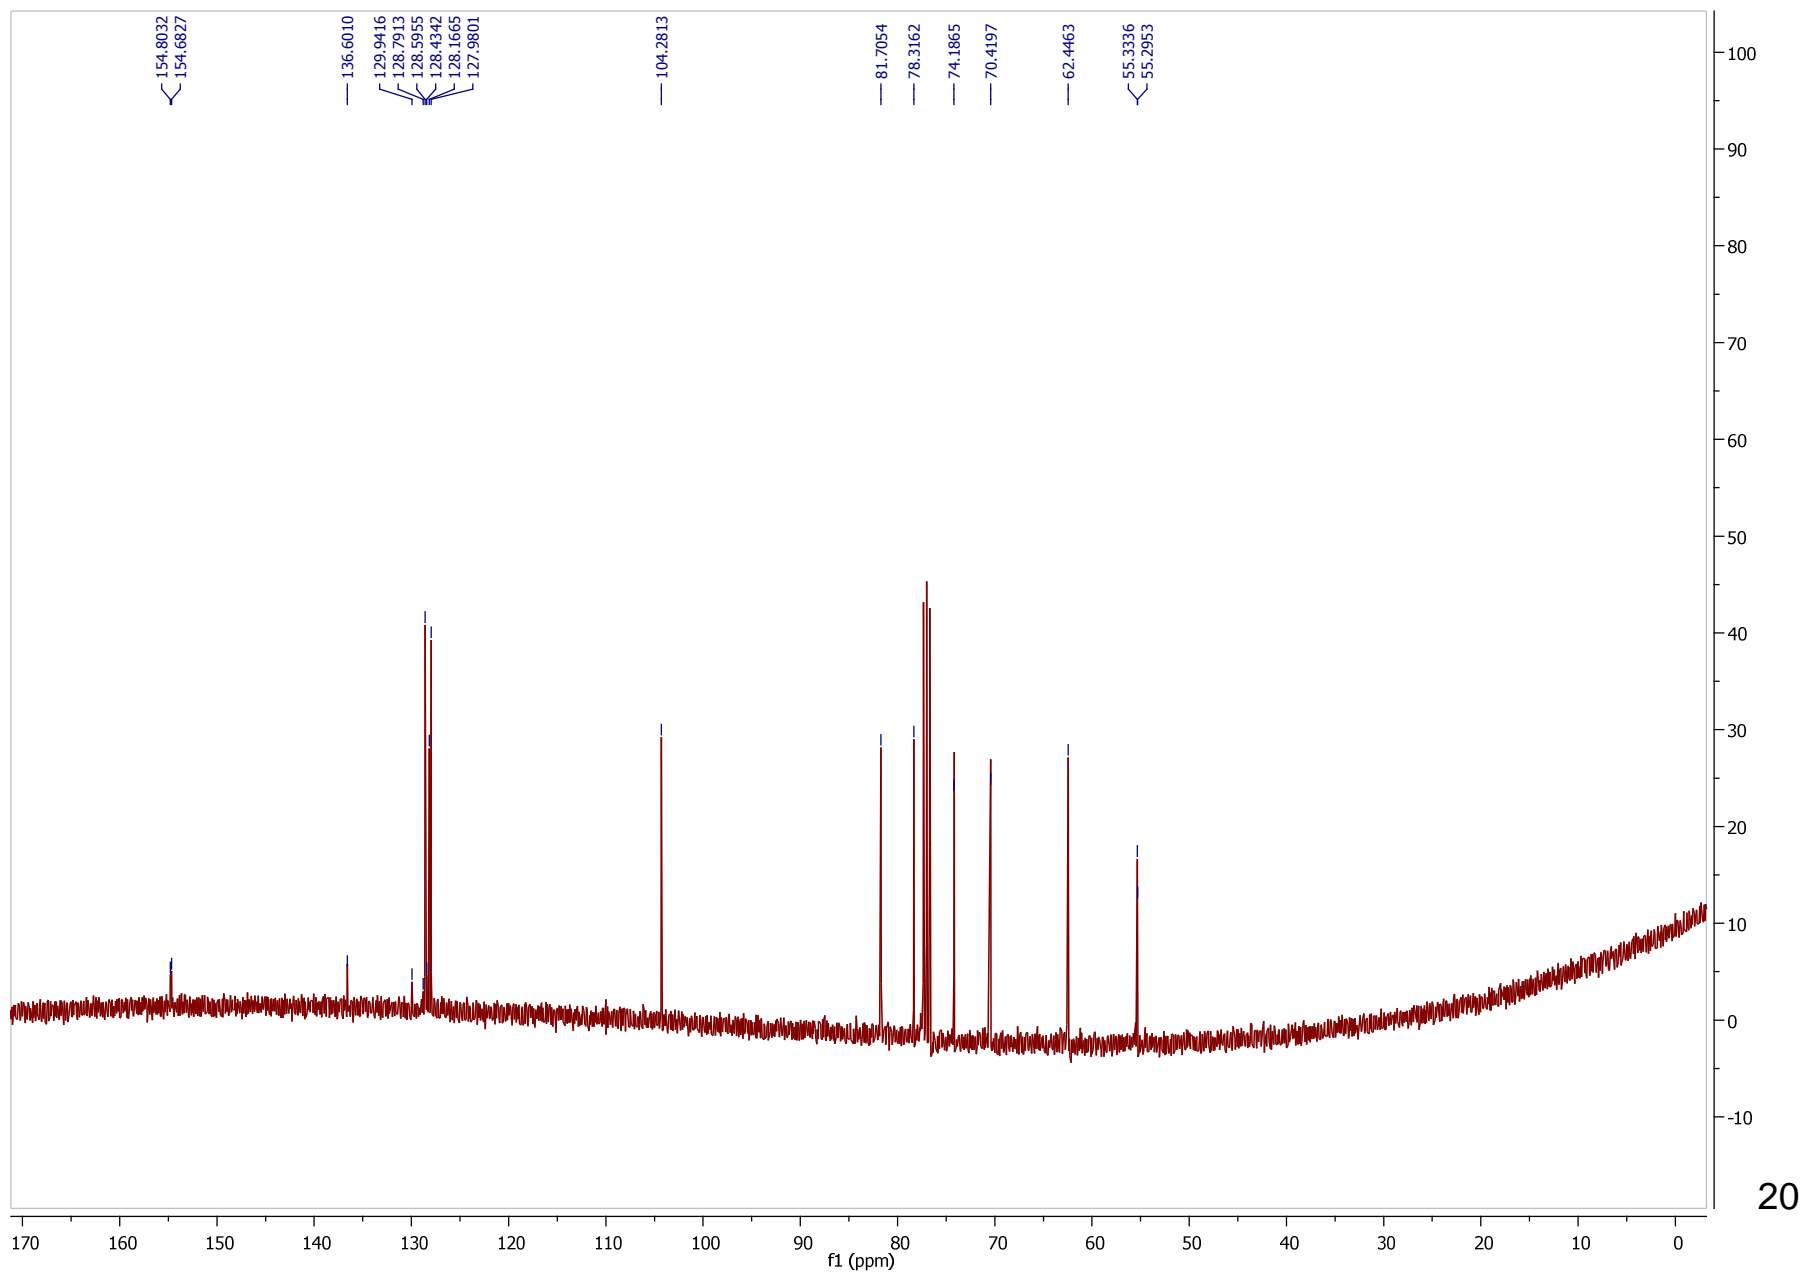

1-O-benzyl-2,3-O-bis(ethylcarbonate)- $\beta$ -D-ribofuranoside **7b**:  $^1\text{H-NMR}$

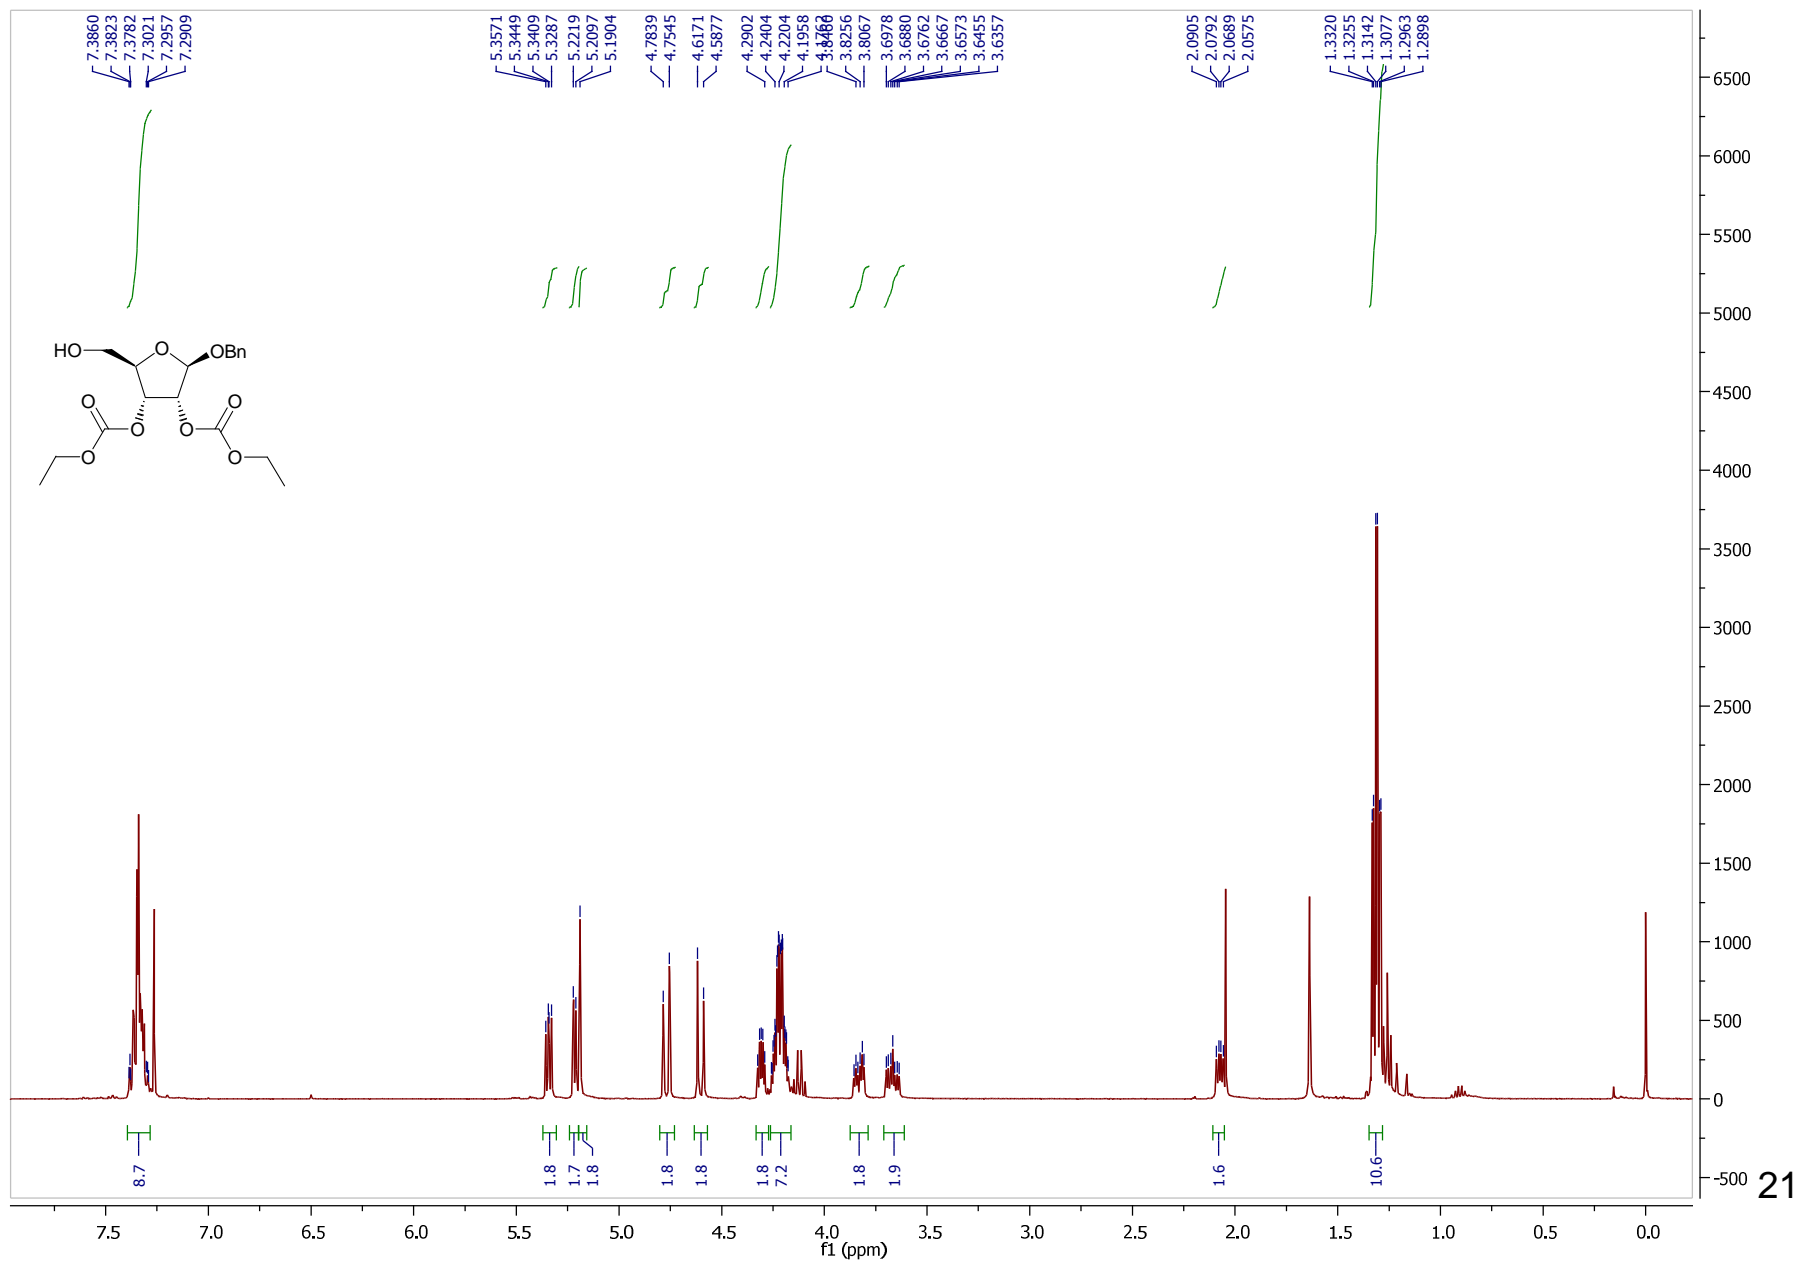

*1-O-benzyl-2,3-O-bis(ethylcarbonate)-β-D-ribofuranoside 7b*: <sup>13</sup>C-NMR

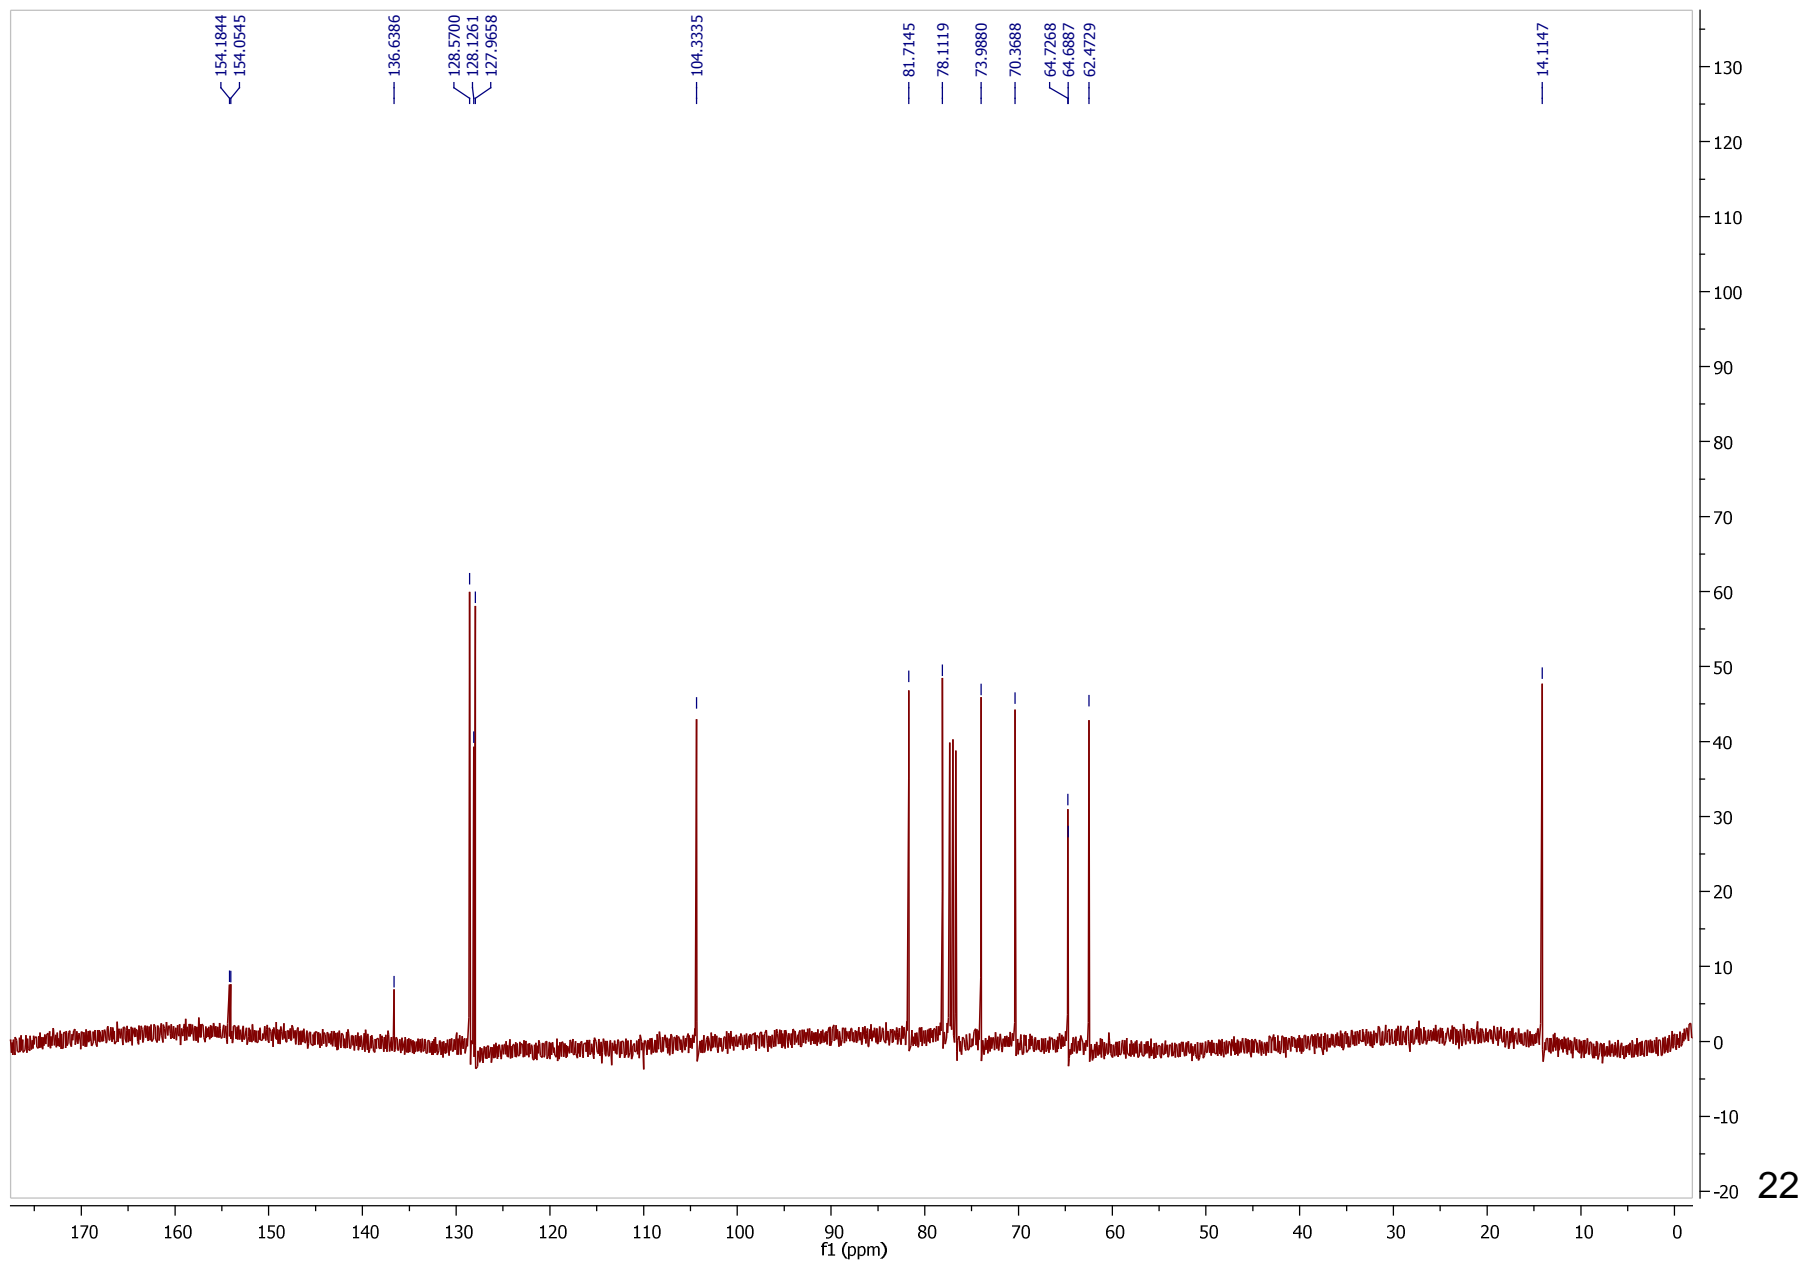

1-O-benzyl-2,3-O-bis(isobutylcarbonate)- $\beta$ -D-ribofuranoside **7c**:  $^1\text{H-NMR}$

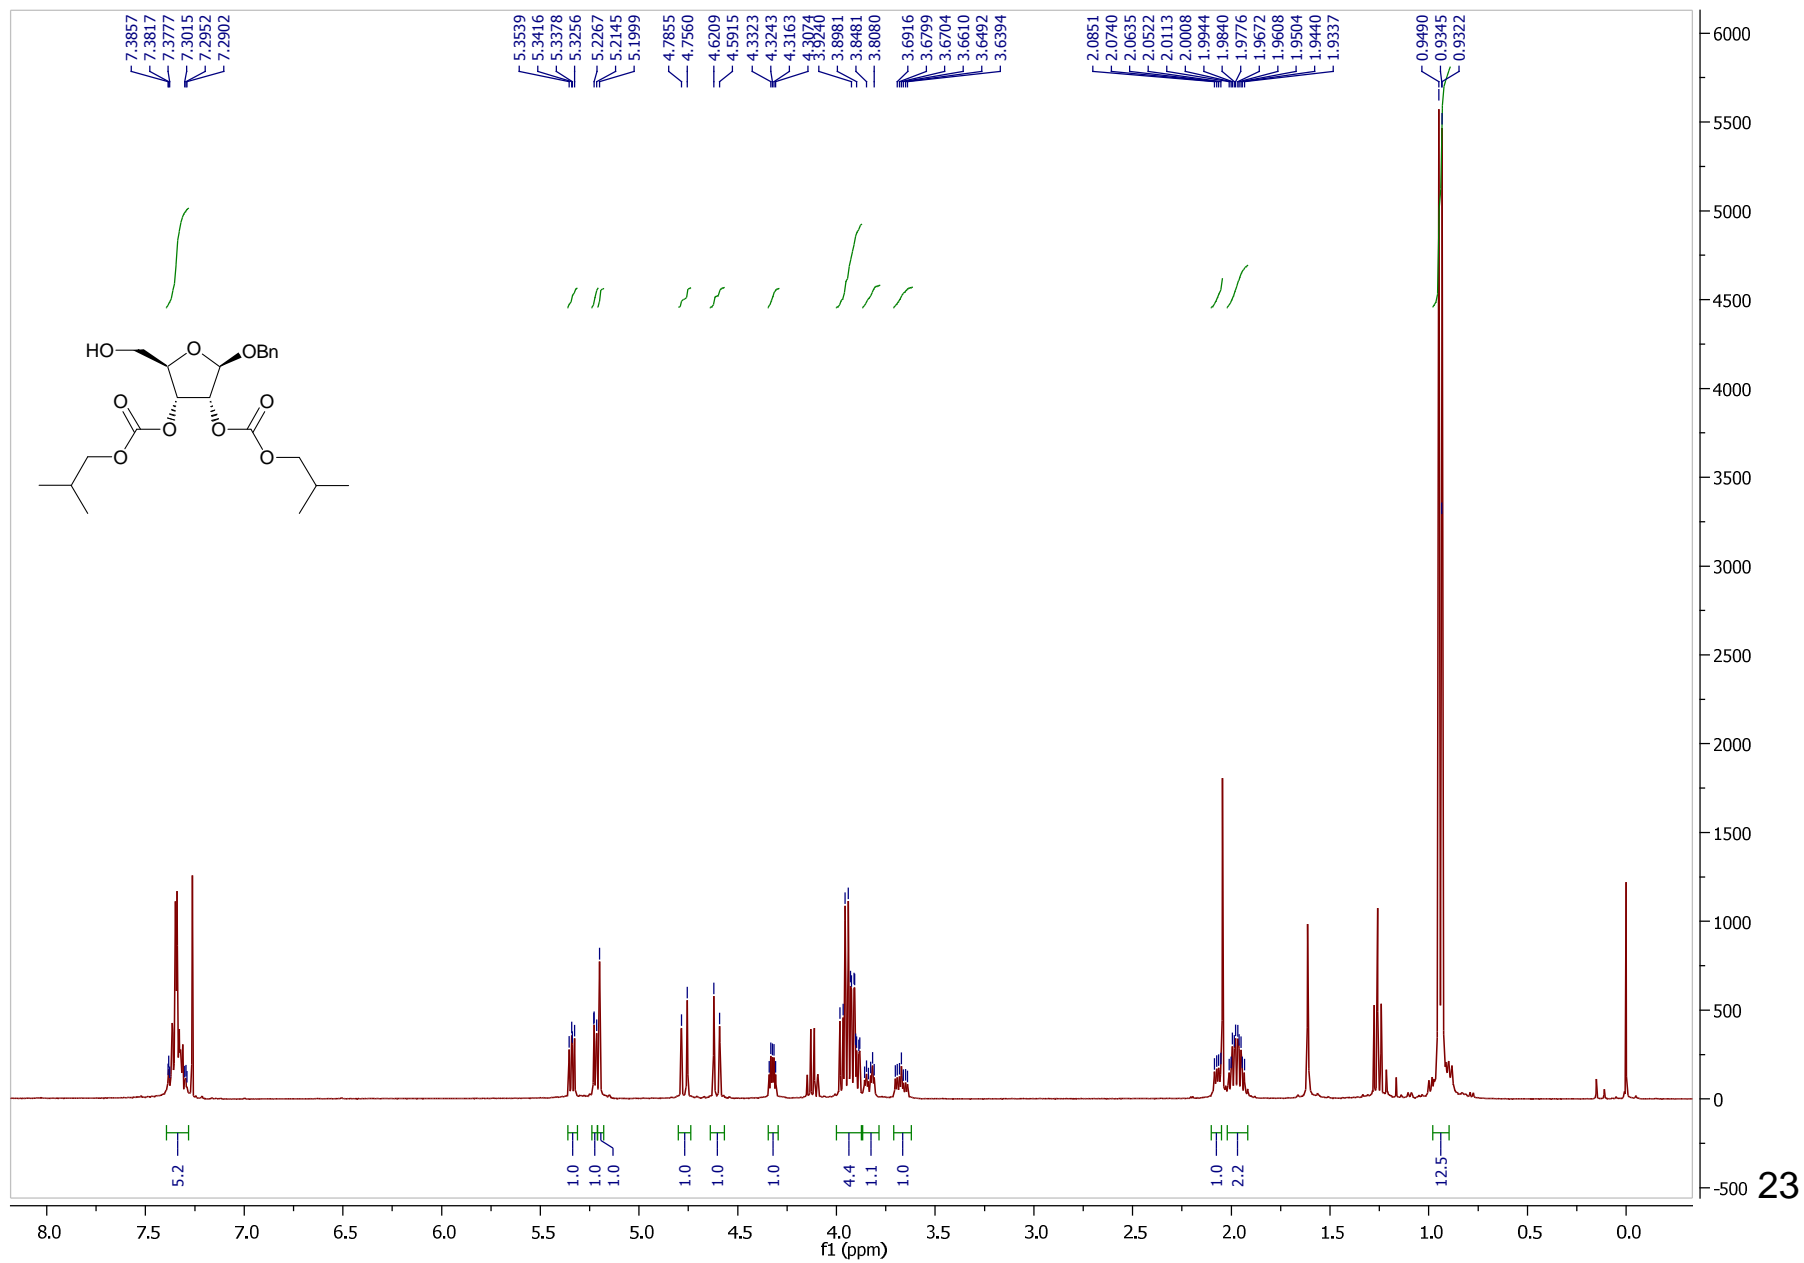

1-O-benzyl-2,3-O-bis(isobutylcarbonate)- $\beta$ -D-ribofuranoside **7c**:  $^{13}\text{C}$ -NMR

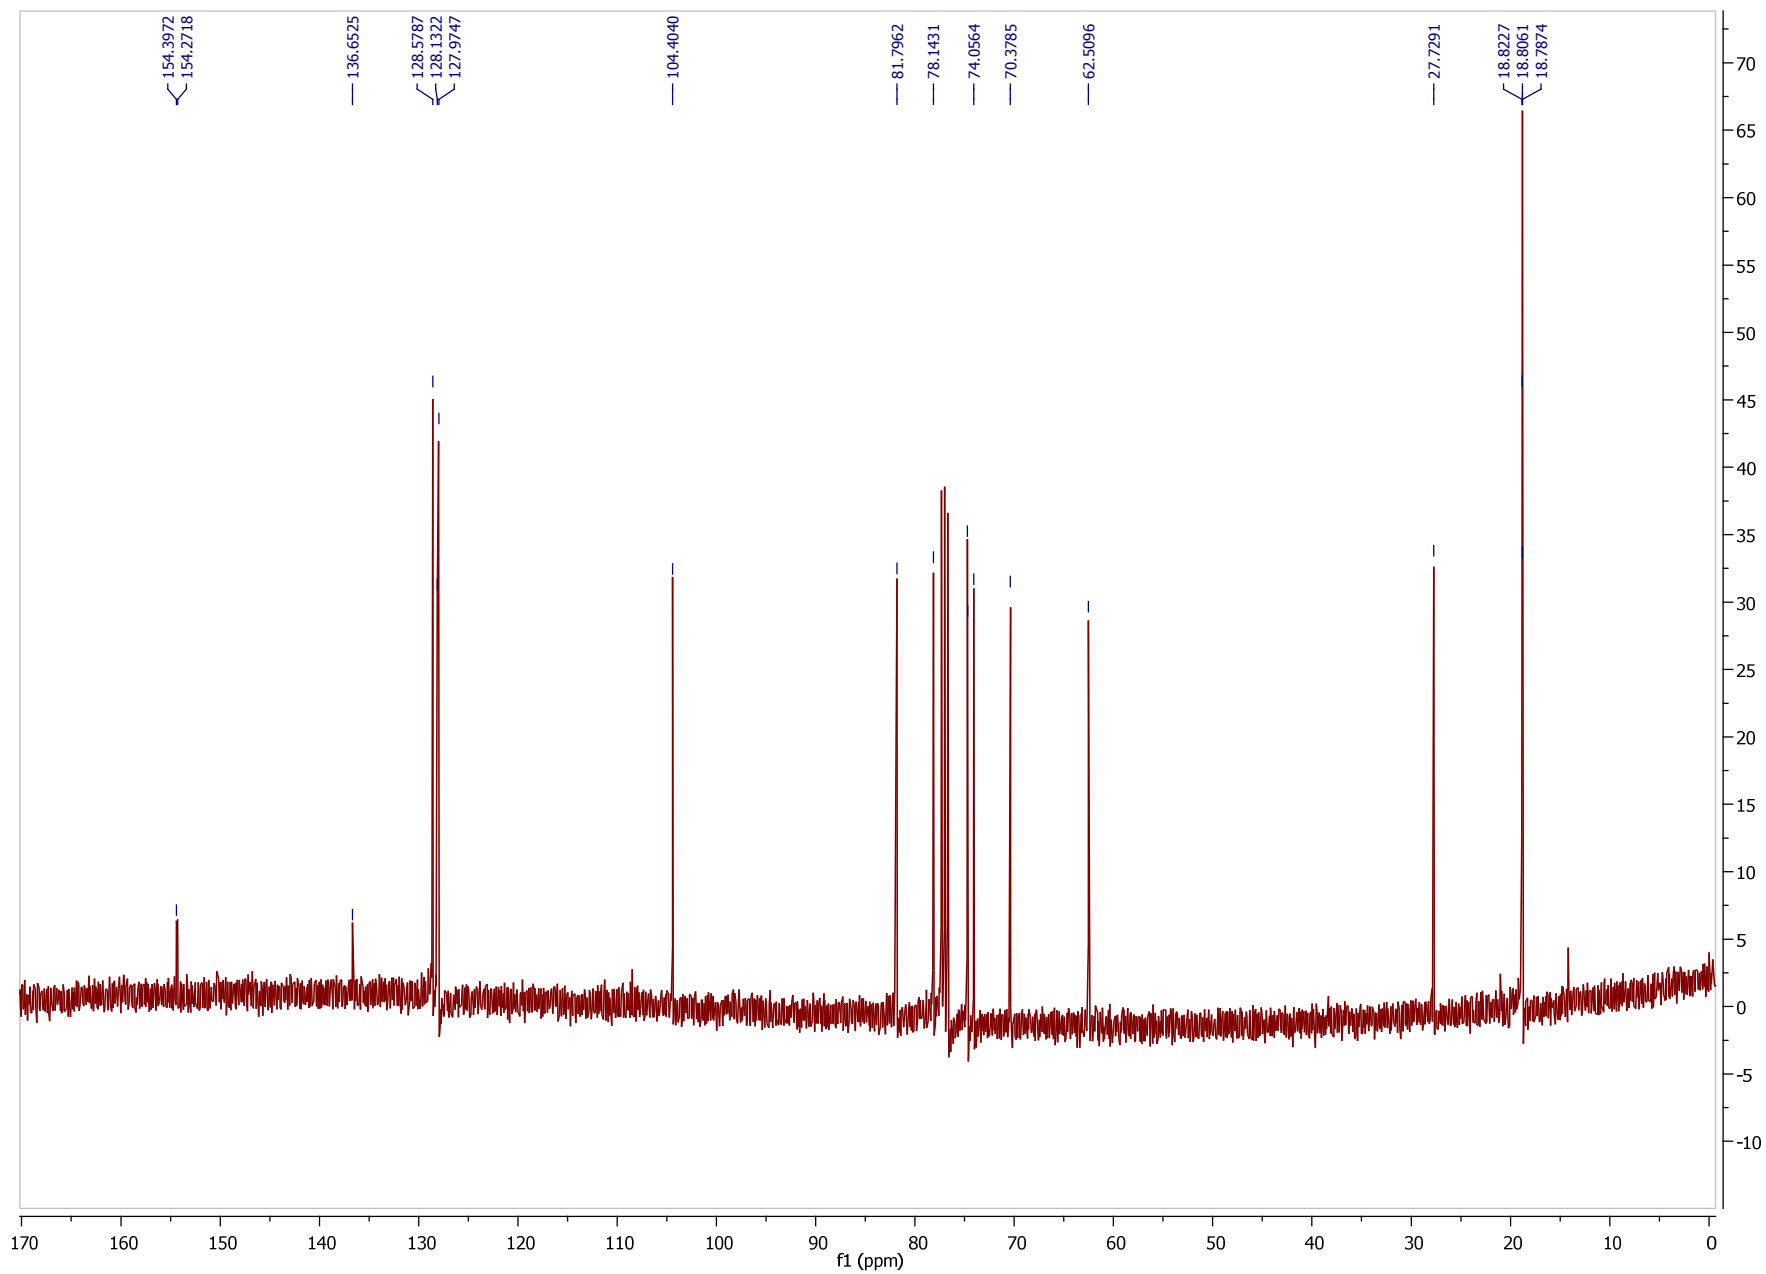



5-O-dibenzylphosphate-1-O-benzyl-2,3-O-bis(methylcarbonate)- $\beta$ -D-ribofuranoside **9a**:  $^1\text{H-NMR}$

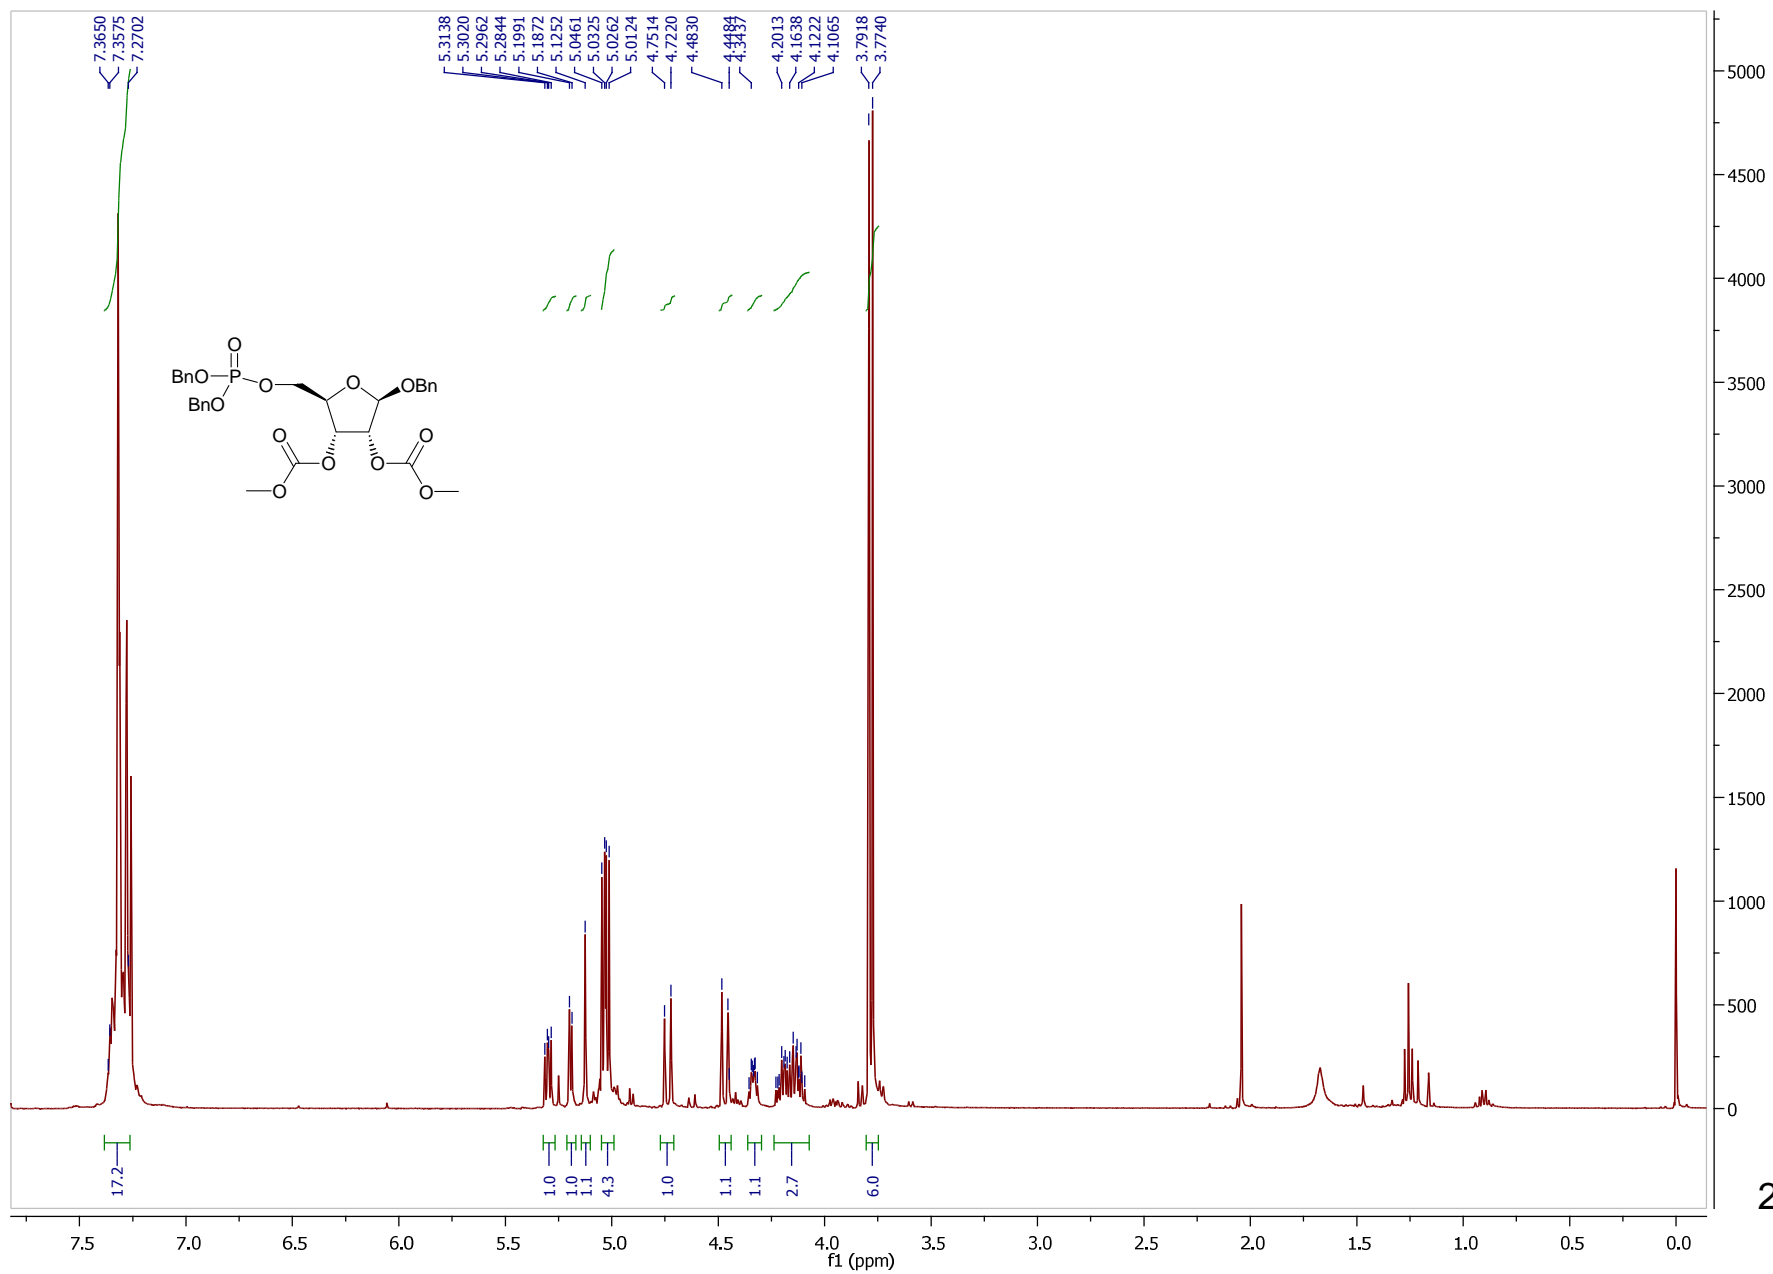

5-O-dibenzylphosphate-1-O-benzyl-2,3-O-bis(methylcarbonate)- $\beta$ -D-ribofuranoside **9a**:  $^{13}\text{C}$ -NMR

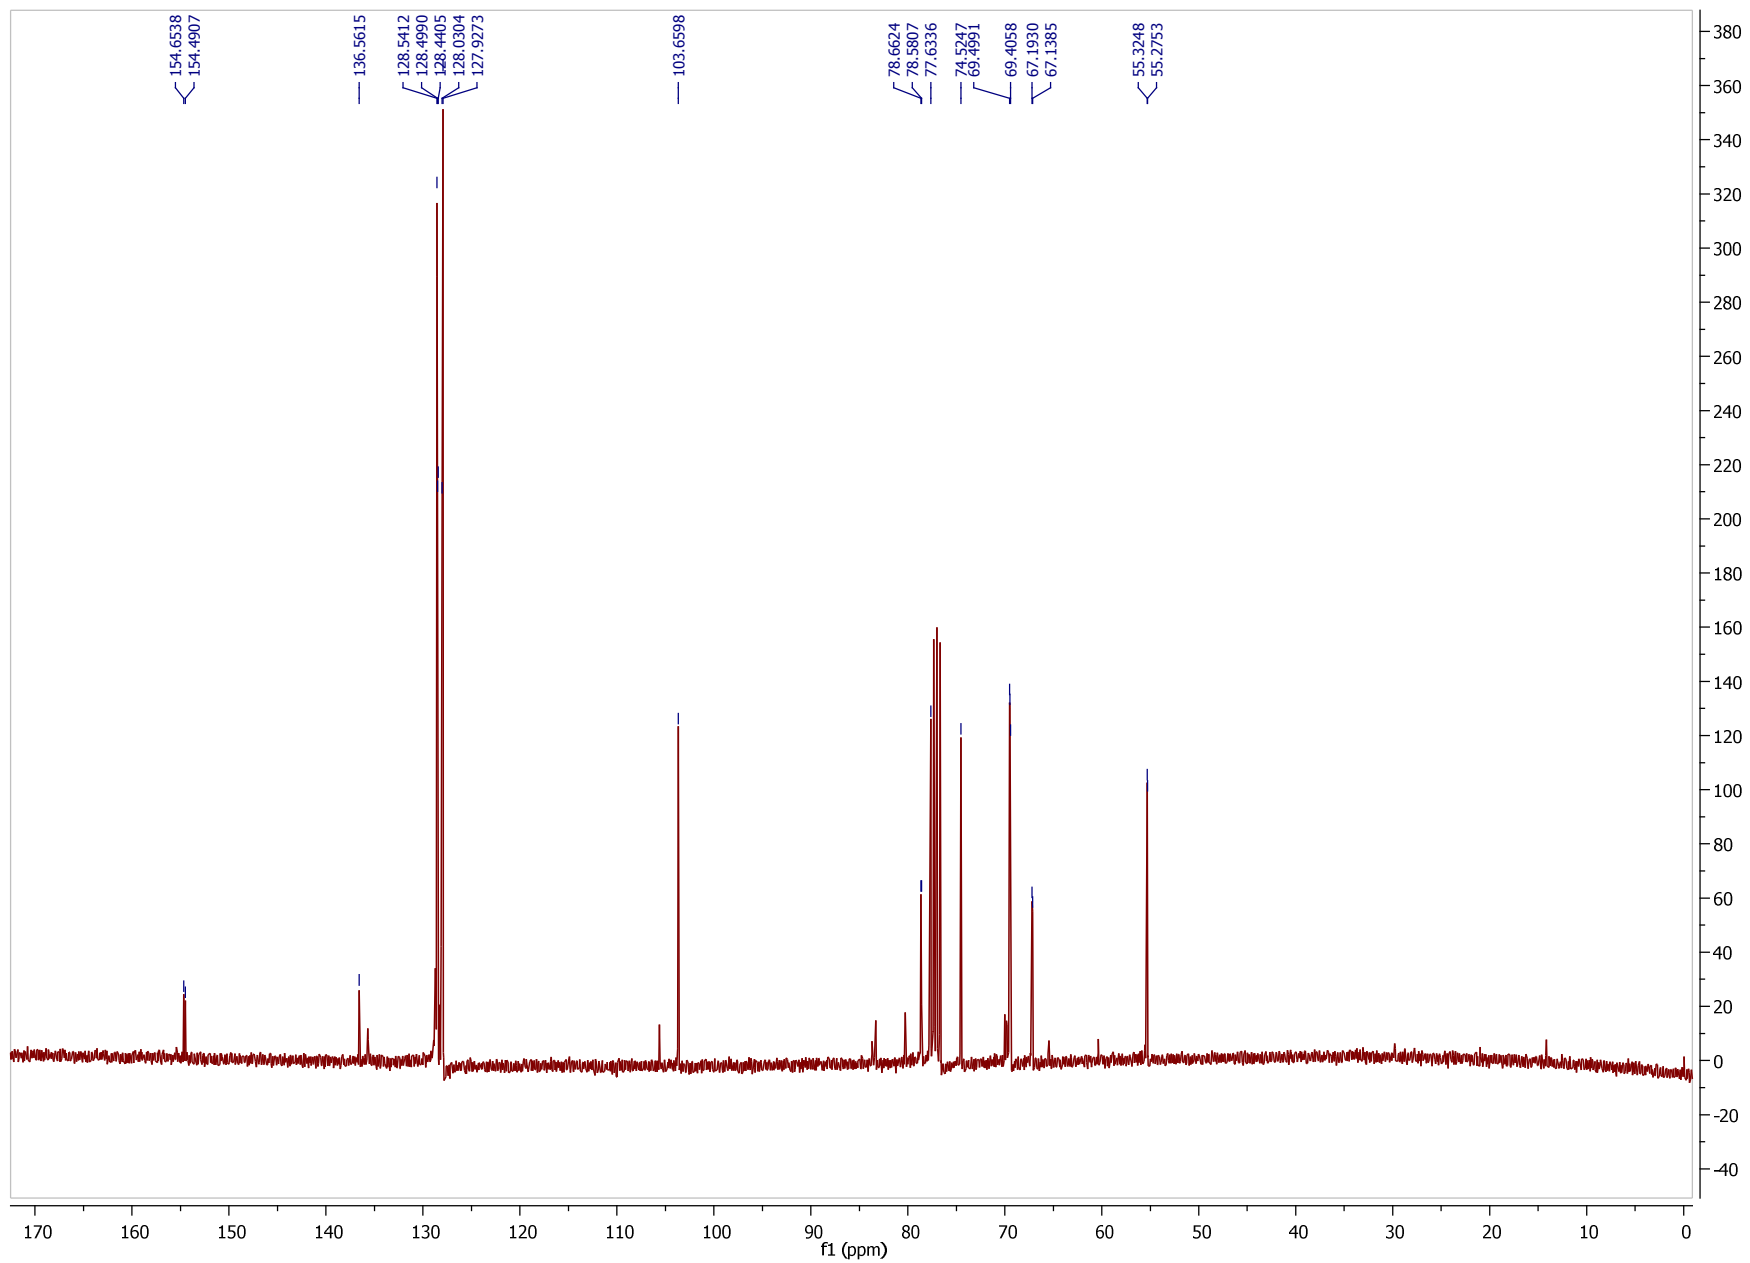

5-O-dibenzylphosphate-1-O-benzyl-2,3-O-bis(ethylcarbonate)- $\beta$ -D-ribofuranoside **9b**:  $^1\text{H-NMR}$

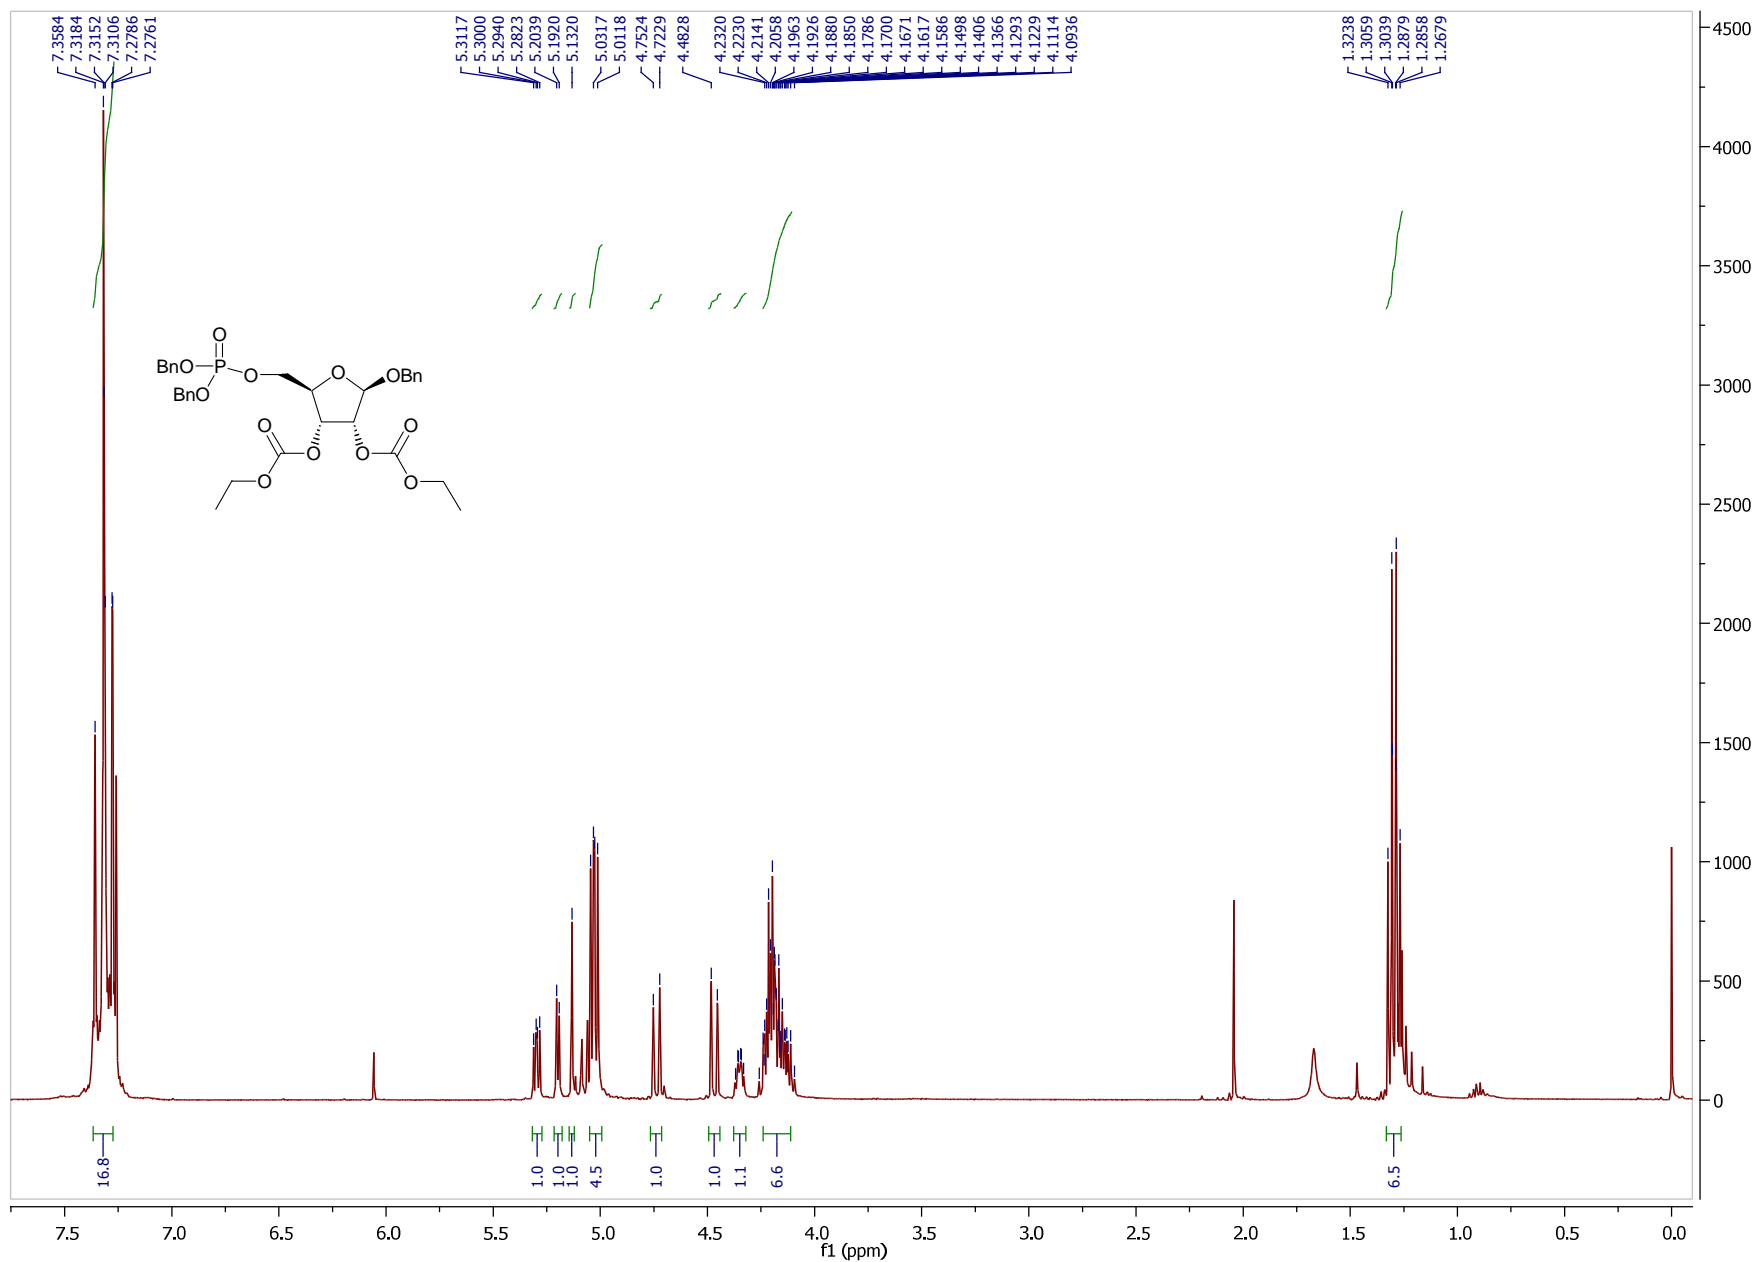

5-O-dibenzylphosphate-1-O-benzyl-2,3-O-bis(ethylcarbonate)- $\beta$ -D-ribofuranoside **9b**:  $^{13}\text{C}$ -NMR

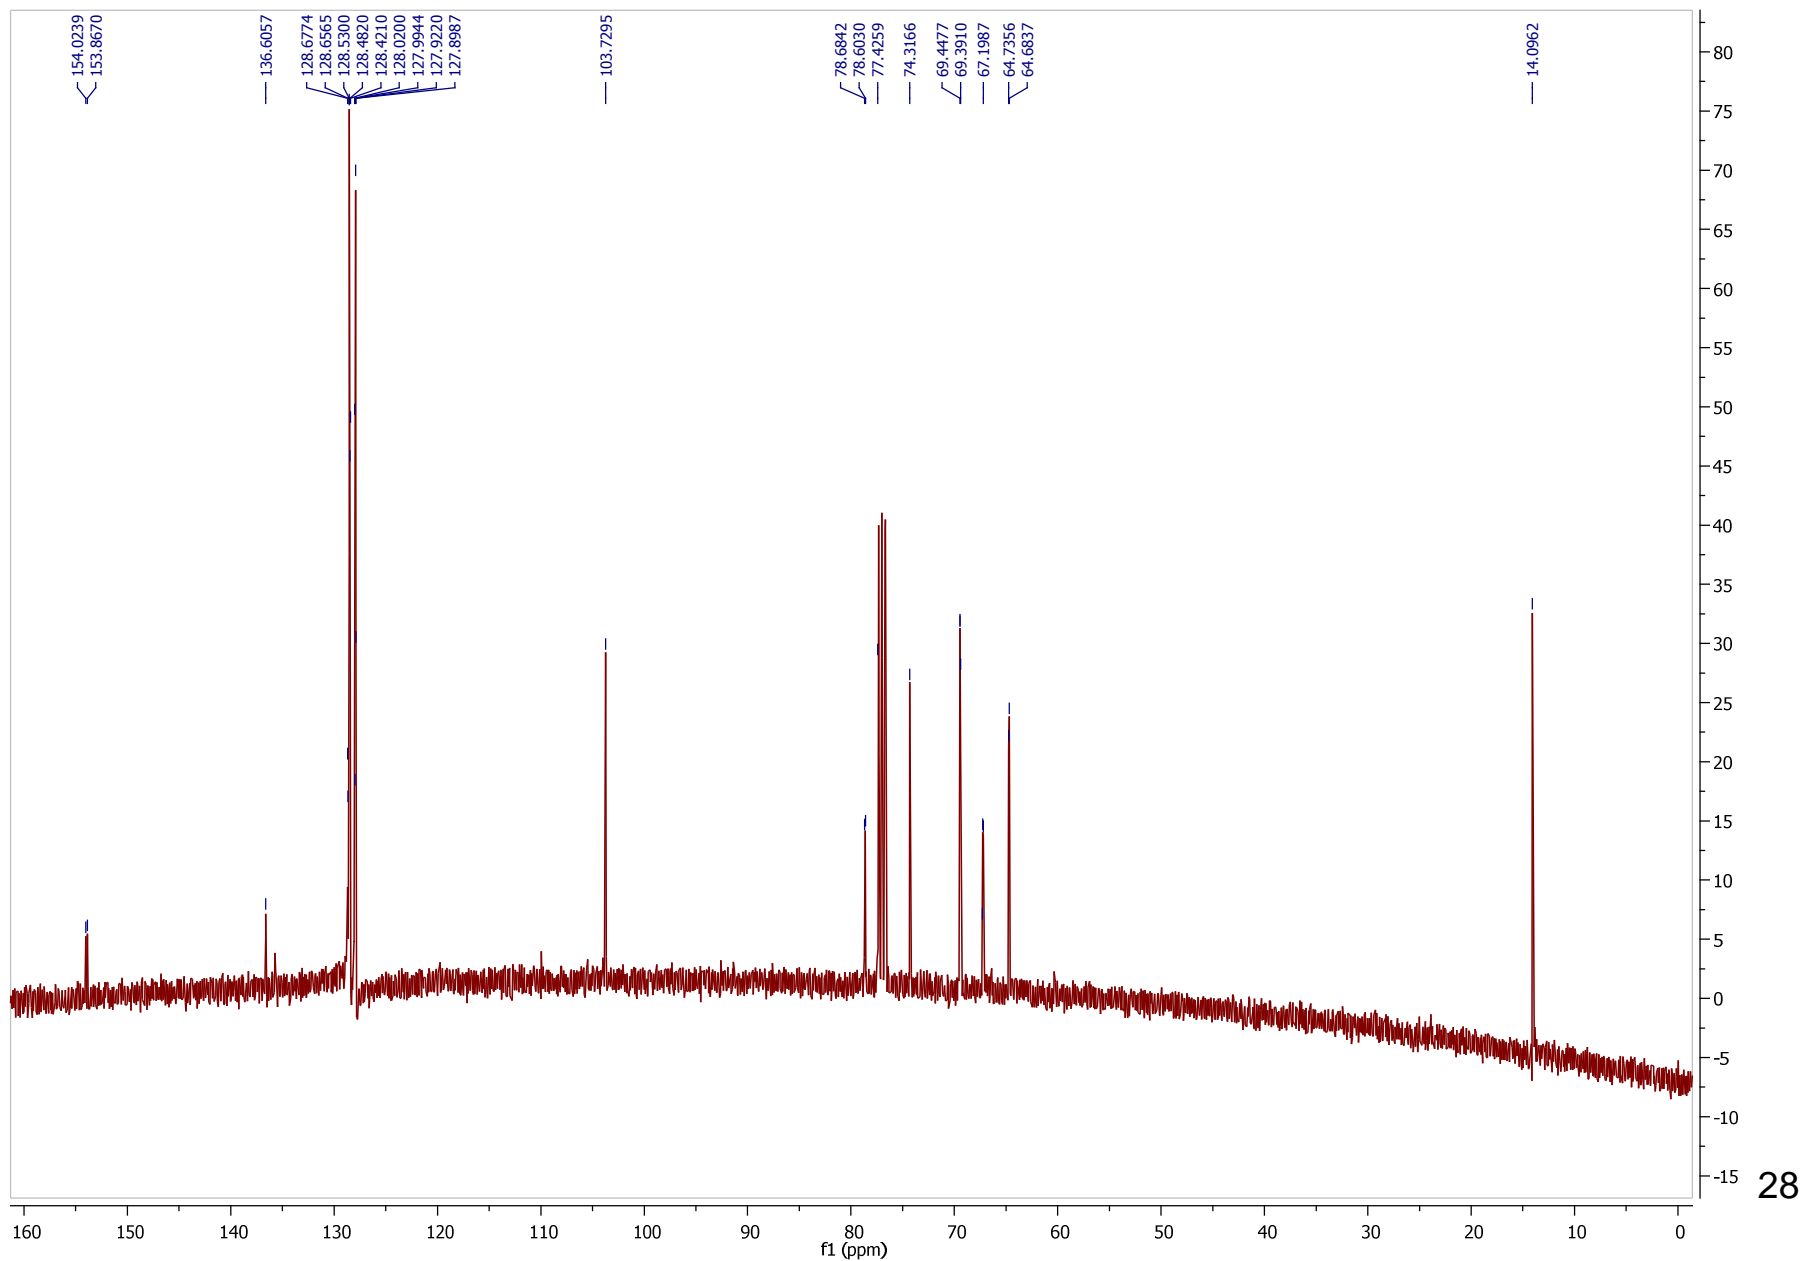

5-O-dibenzylphosphate-1-O-benzyl-2,3-O-bis(isobutylcarbonate)- $\beta$ -D-ribofuranoside **9c**:  $^1\text{H-NMR}$

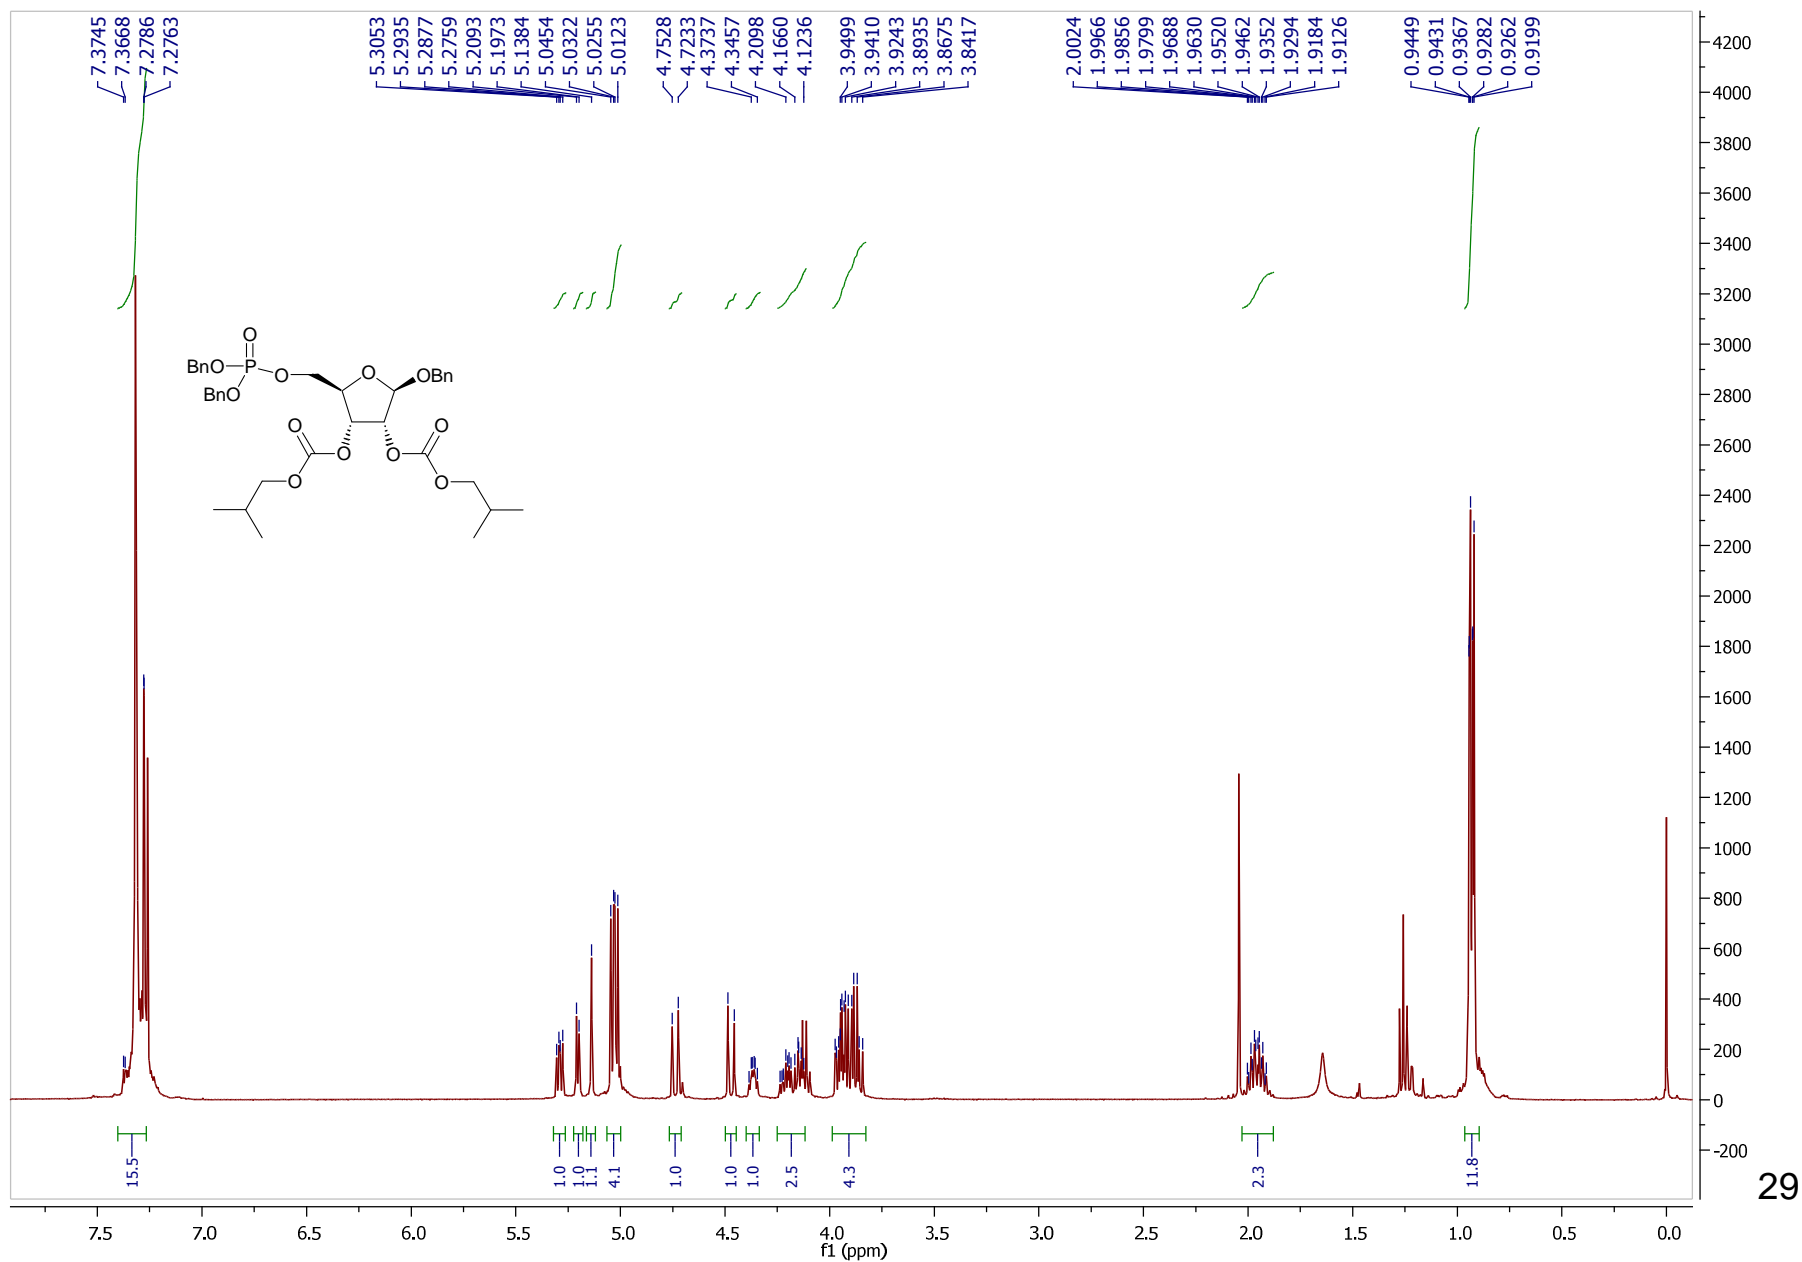

5-O-dibenzylphosphate-1-O-benzyl-2,3-O-bis(isobutylcarbonate)- $\beta$ -D-ribofuranoside **9c**:  $^1\text{H-NMR}$

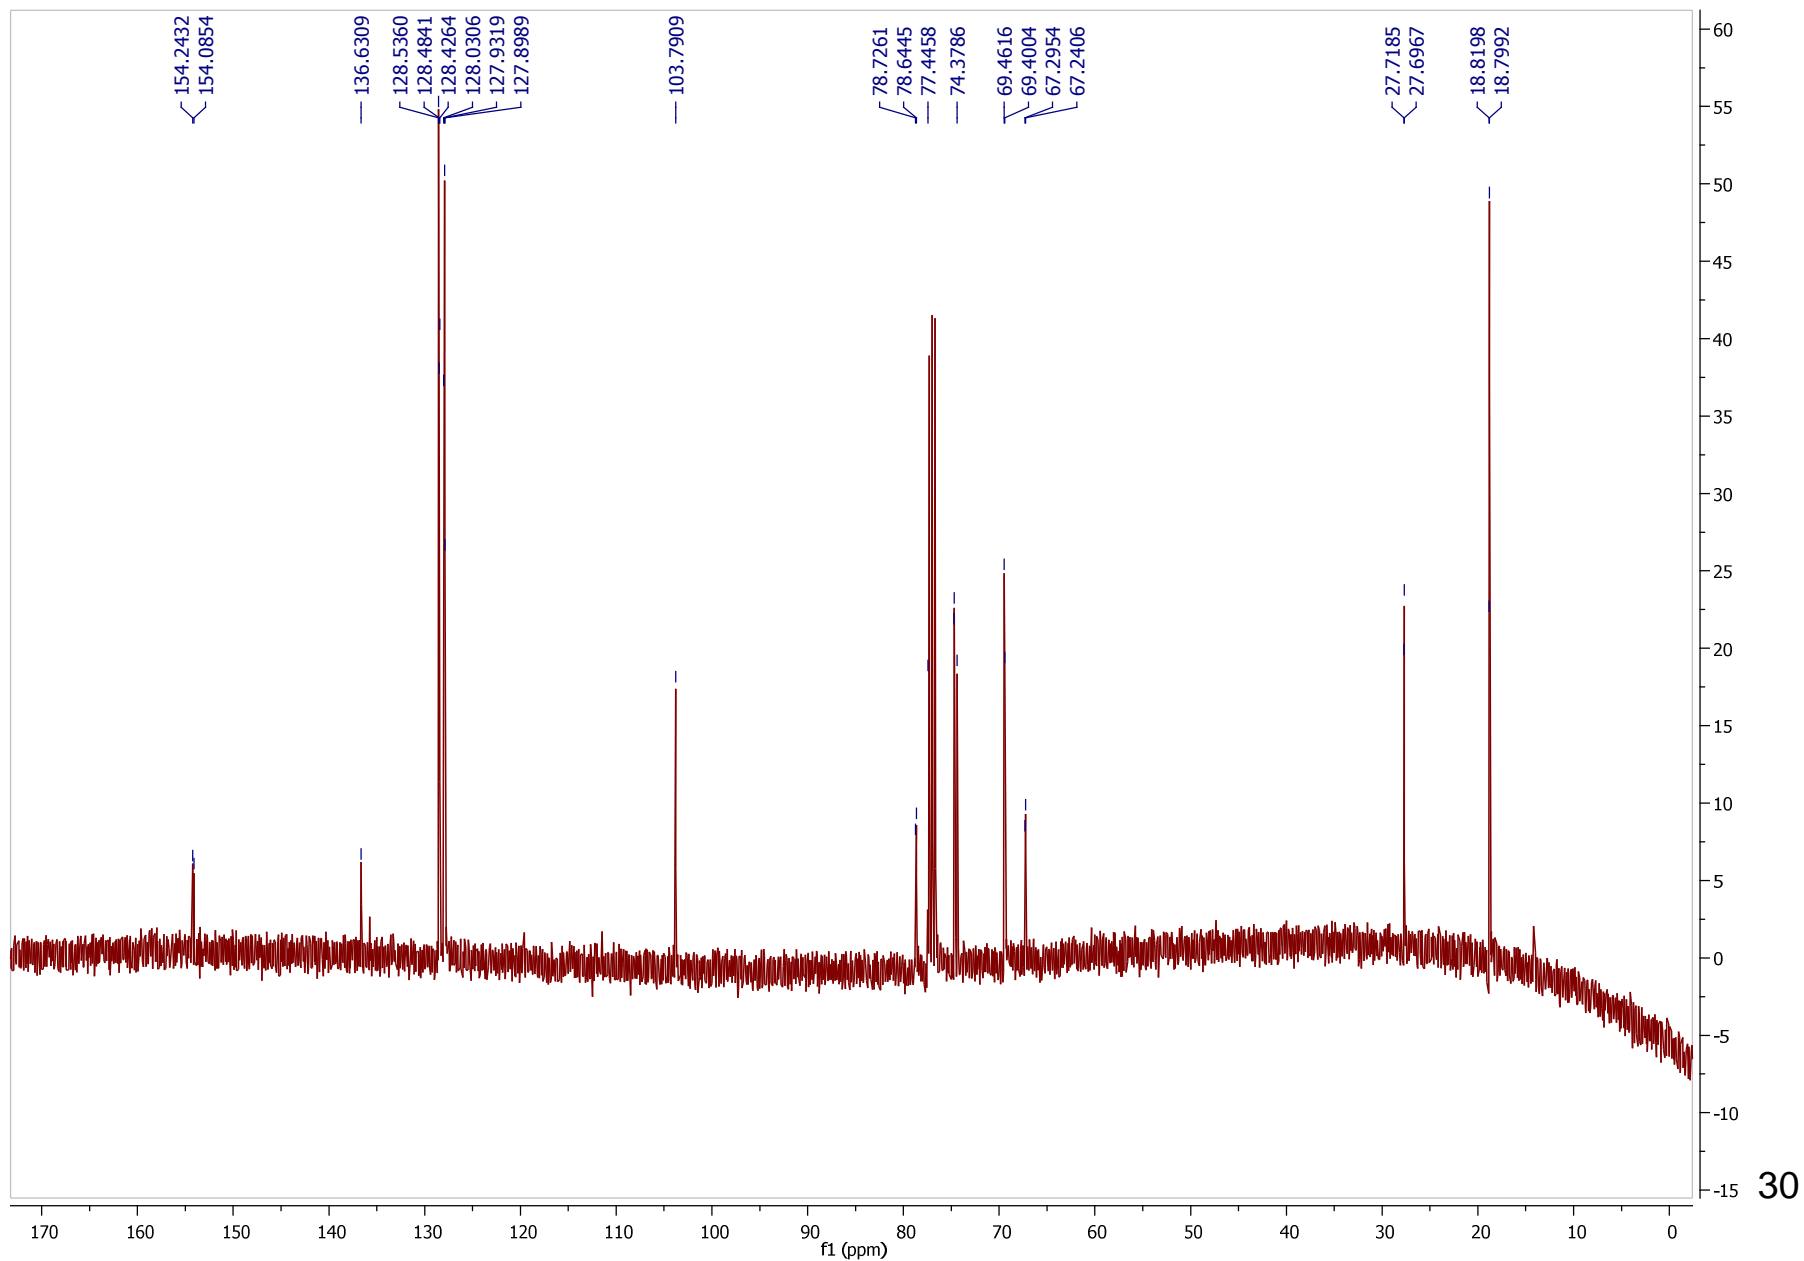

5-O-dibenzylphosphate-2,3-O-carbonate- $\beta$ -D-ribofuranose **9d**:  $^1\text{H-NMR}$

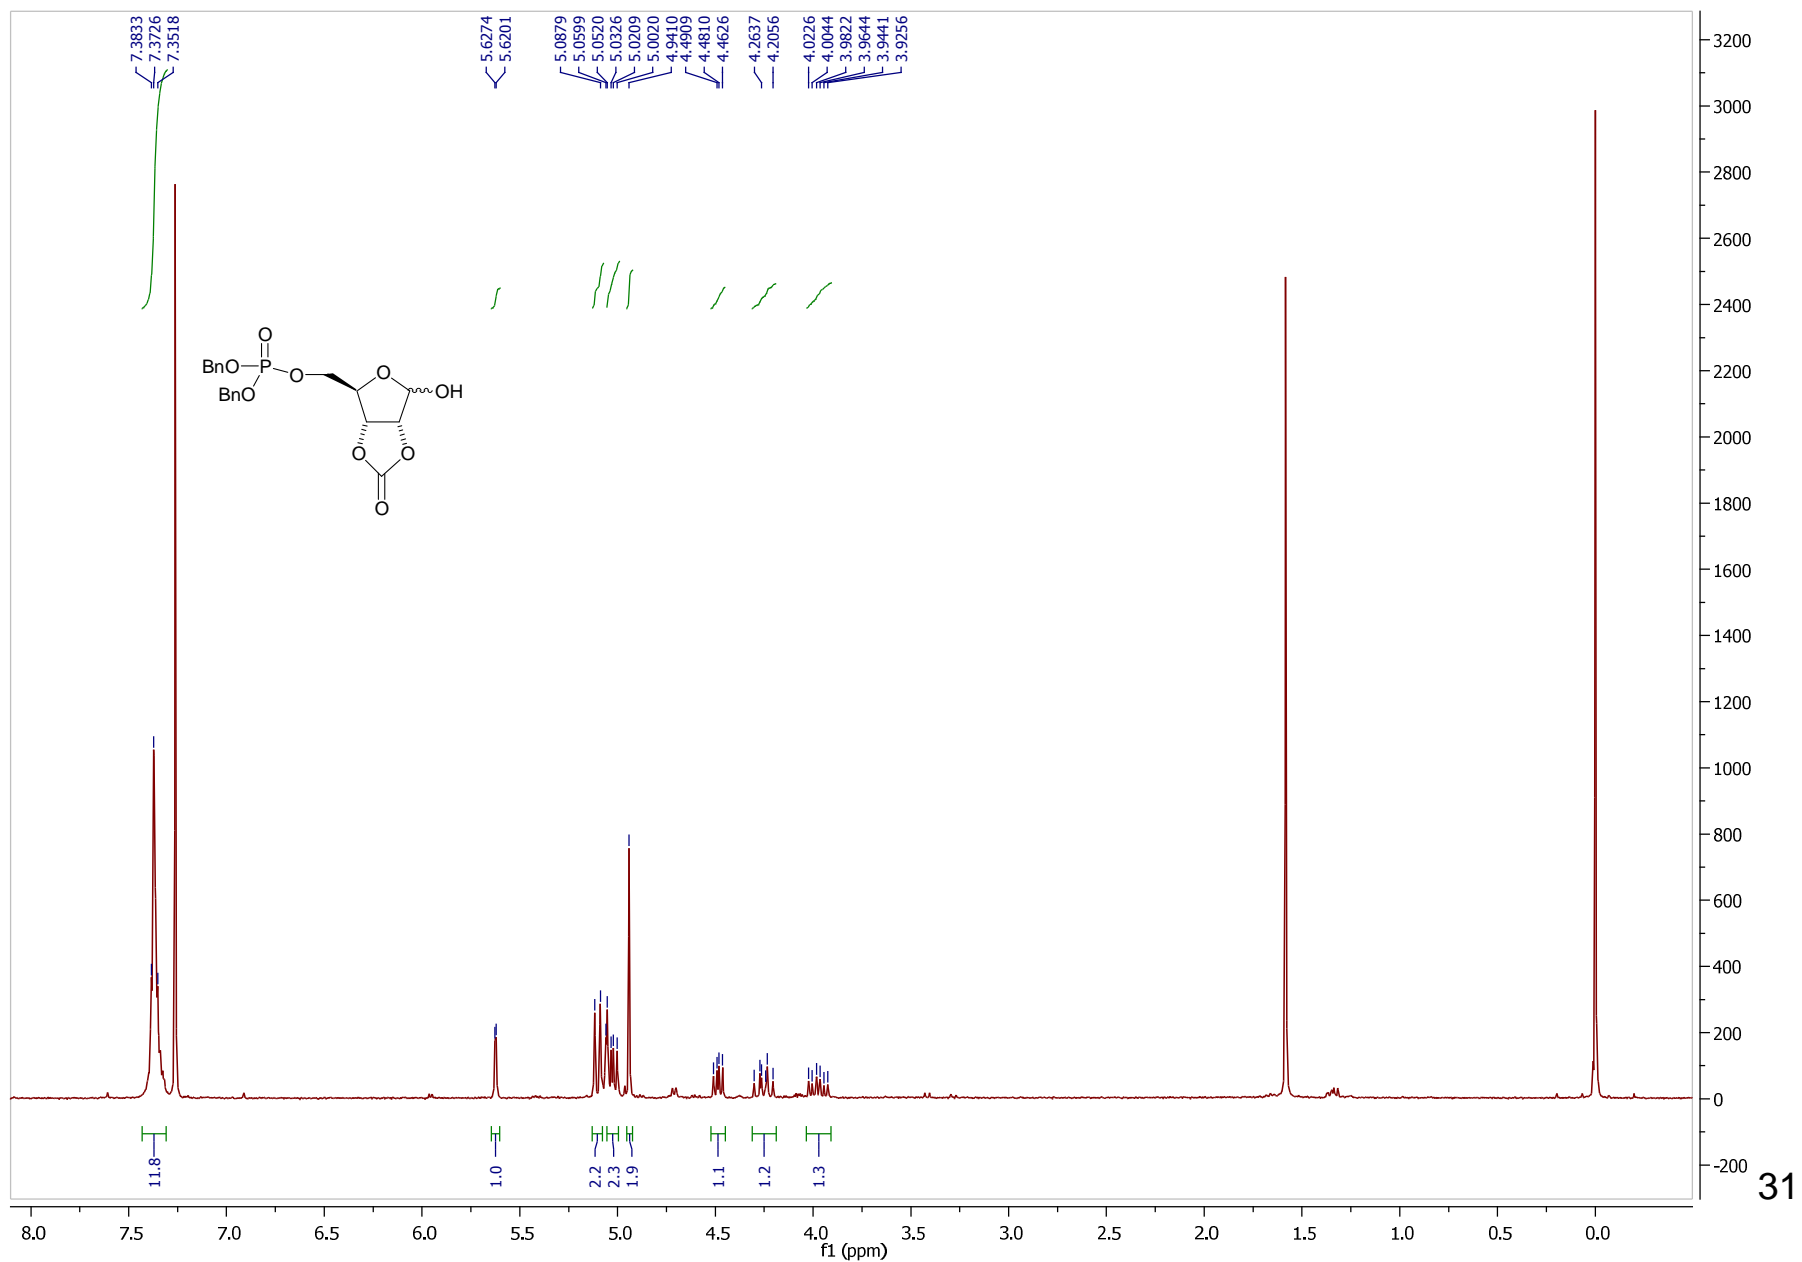

5-O-dibenzylphosphate-2,3-O-carbonate- $\beta$ -D-ribofuranose **9d**:  $^{13}\text{C}$ -NMR

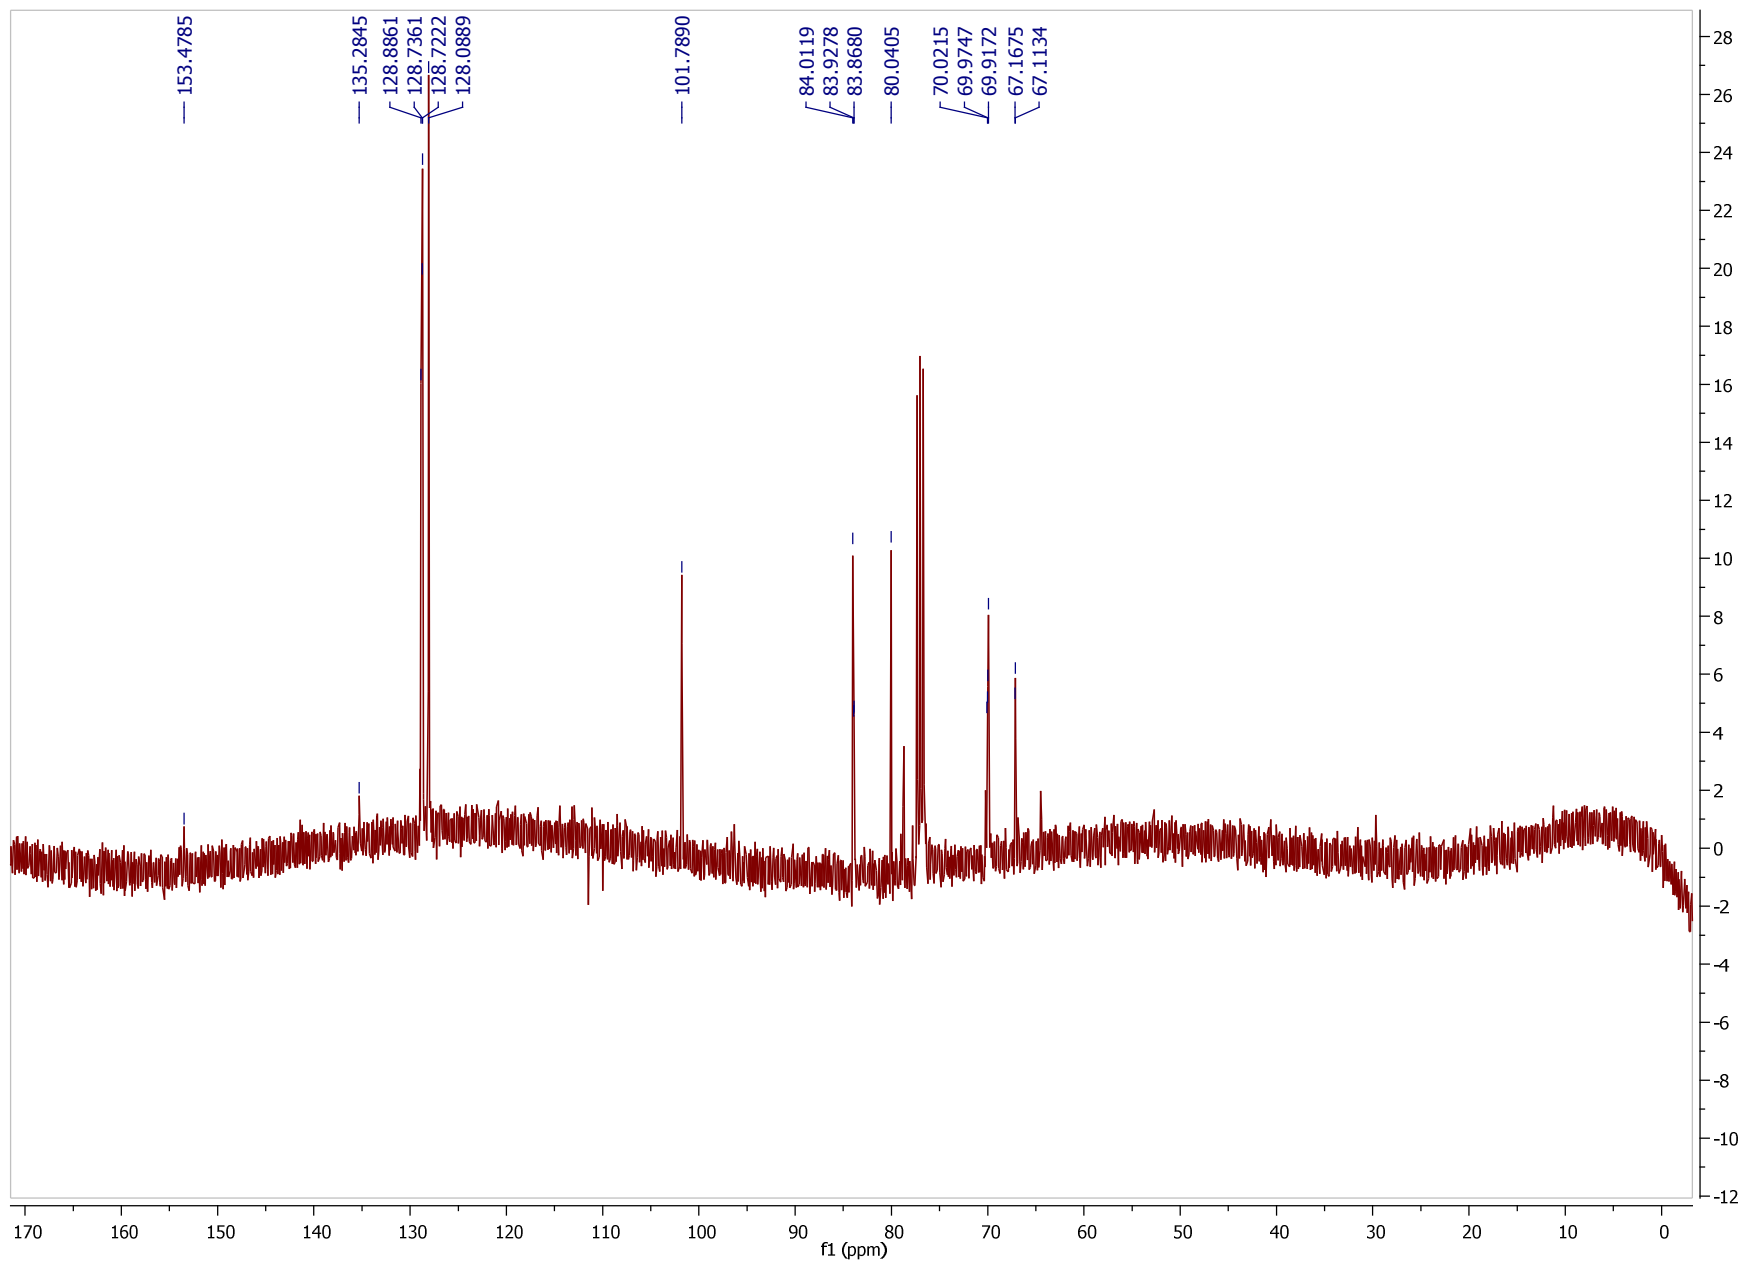



5-O-dibenzylphosphate-1,2-O-isopropylidene-3-O-methylcarbonate- $\alpha$ -D-ribofuranoside **10a**:  $^1\text{H-NMR}$

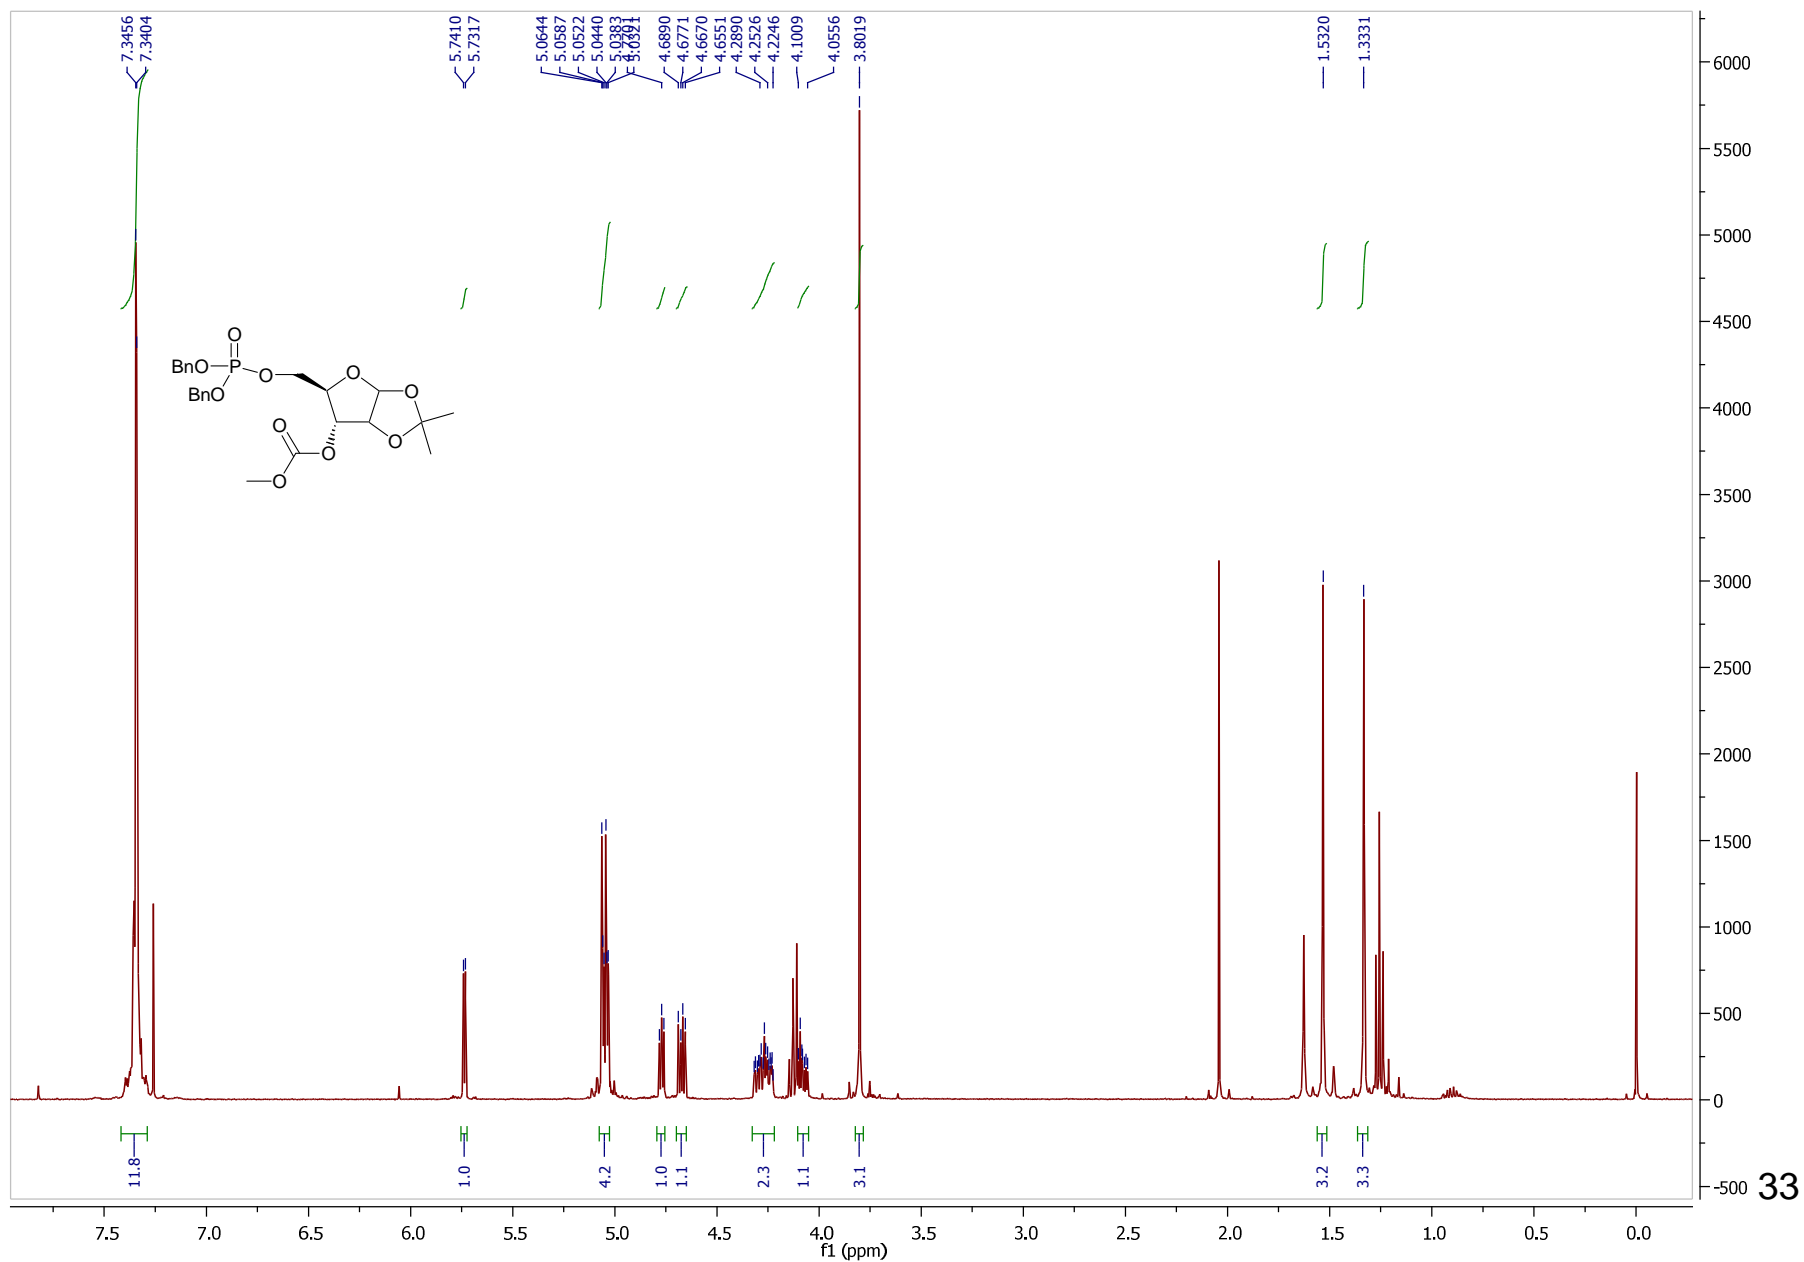

*5-O-dibenzylphosphate-1,2-O-isopropylidene-3-O-methylcarbonate- $\alpha$ -D-ribofuranoside 10a*:  $^1\text{H-NMR}$

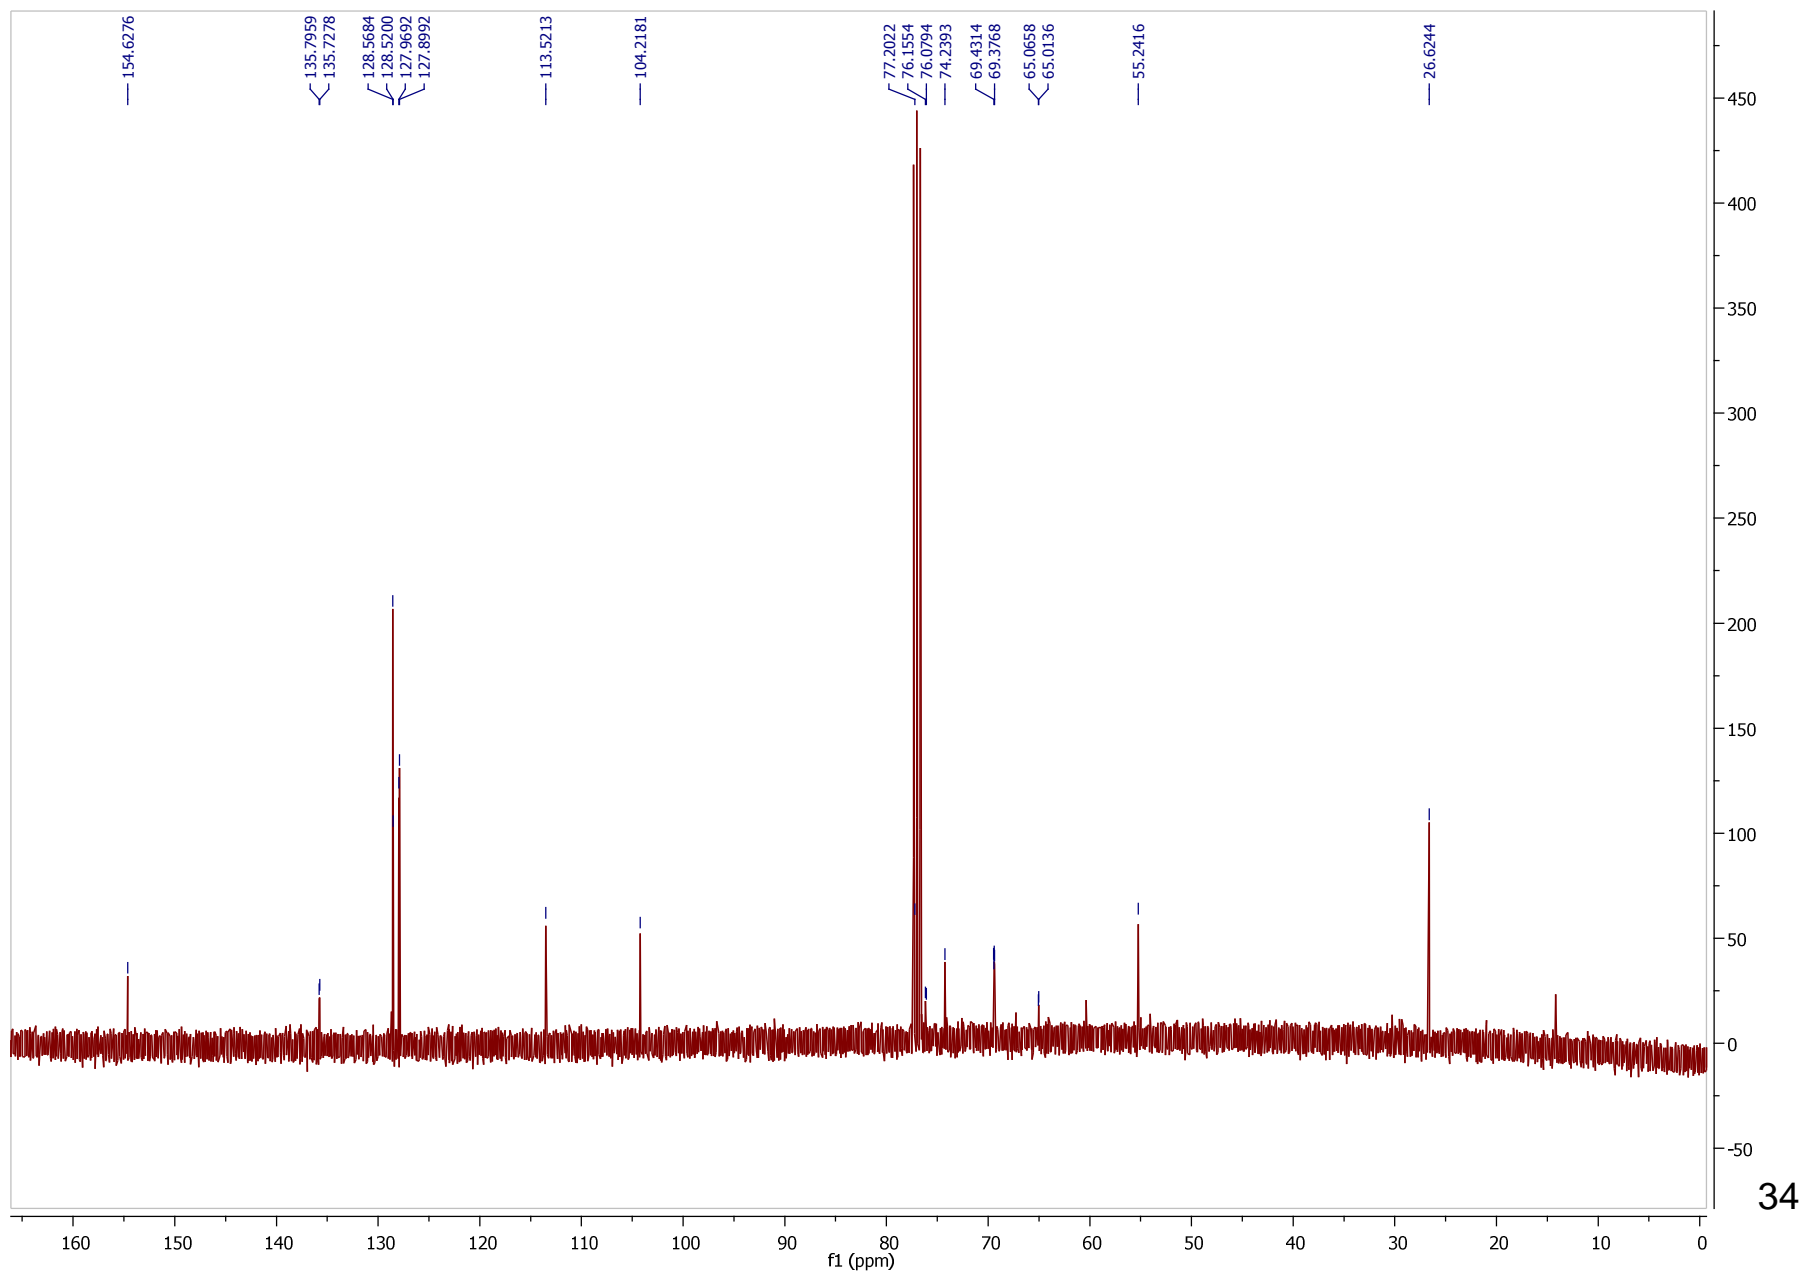

5-O-dibenzylphosphate-1,2-O-isopropylidene-3-O-ethylcarbonate- $\alpha$ -D-ribofuranoside **10b**:  $^1\text{H-NMR}$

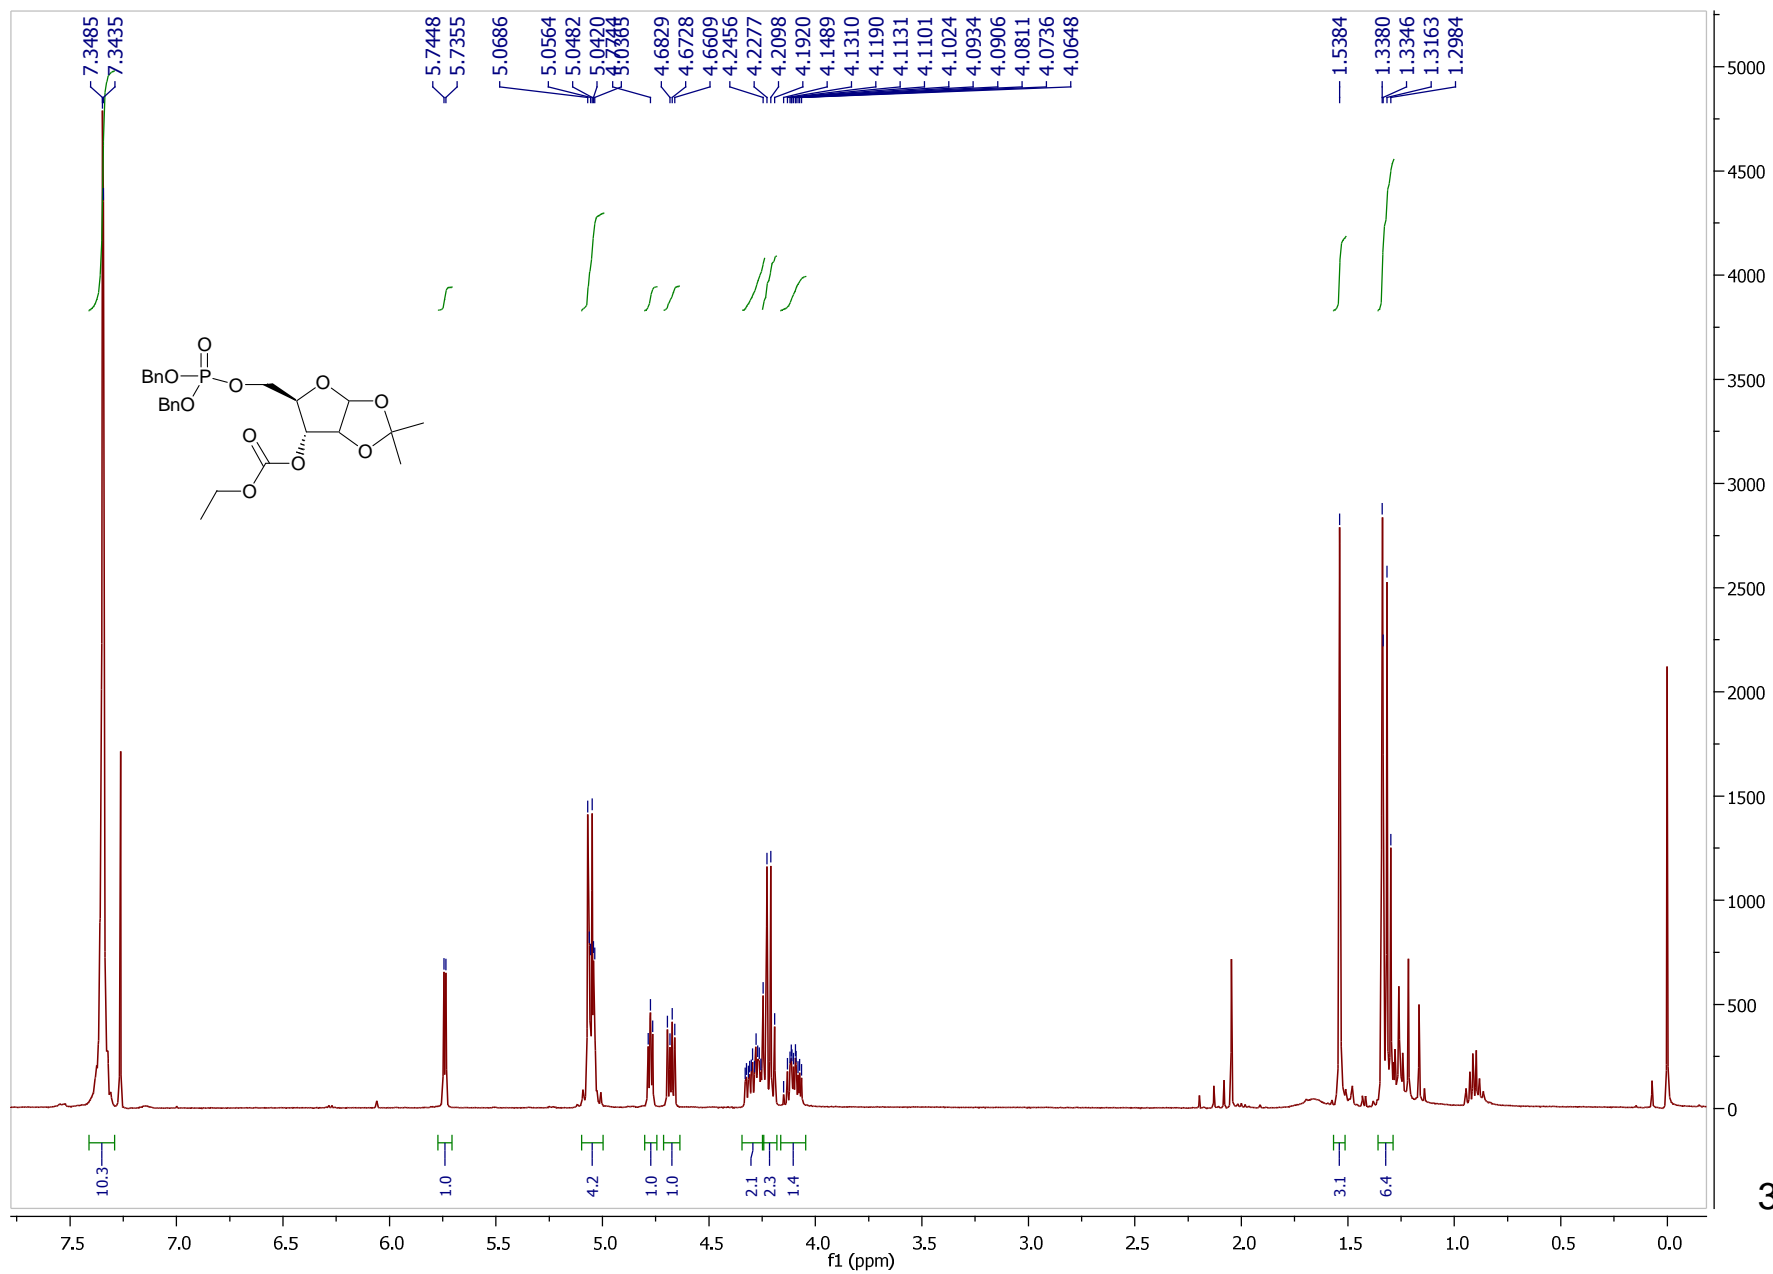

5-O-dibenzylphosphate-1,2-O-isopropylidene-3-O-ethylcarbonate- $\alpha$ -D-ribofuranoside **10b**:  $^{13}\text{C}$ -NMR

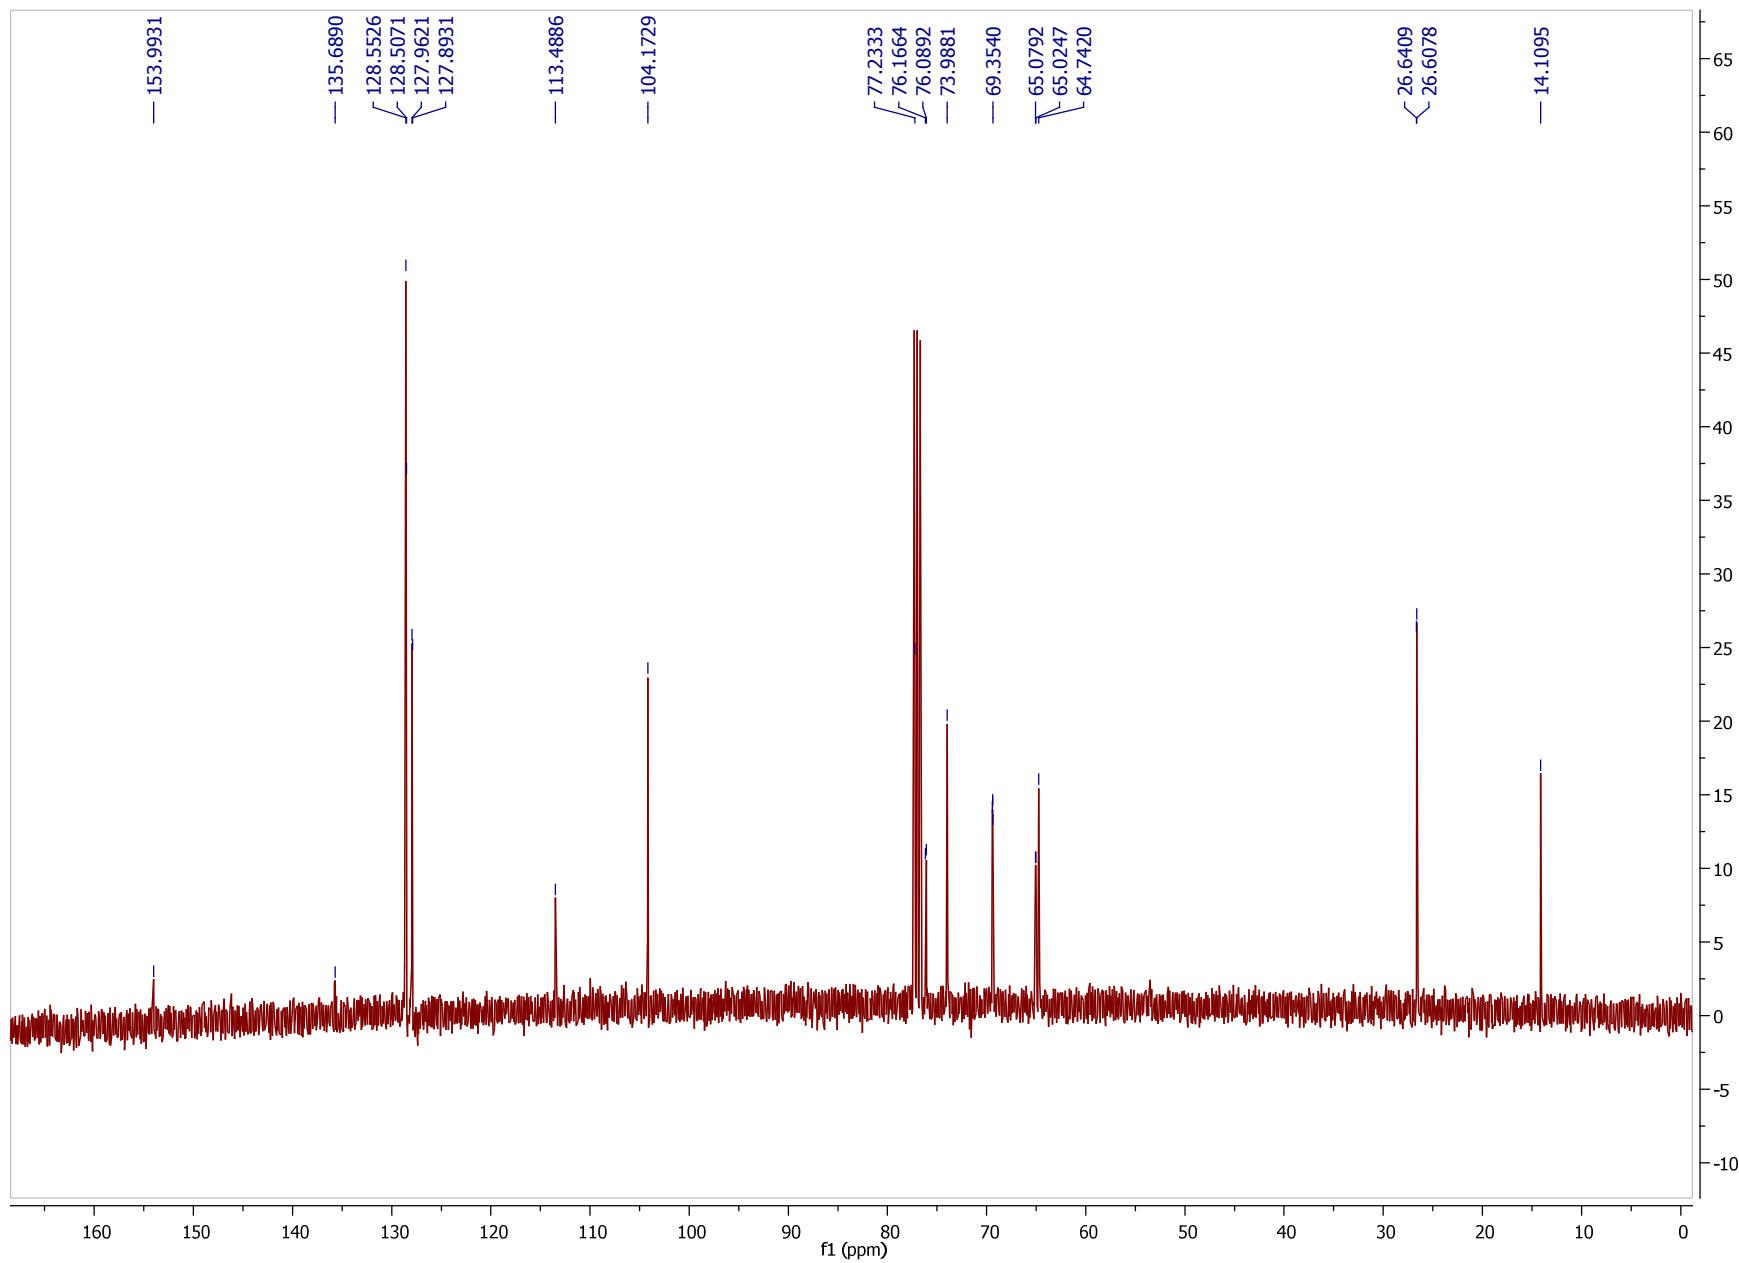

5-O-dibenzylphosphate-1,2-O-isopropylidene-3-O-isobutylcarbonate- $\alpha$ -D-ribofuranoside **10c**:  $^1\text{H-NMR}$

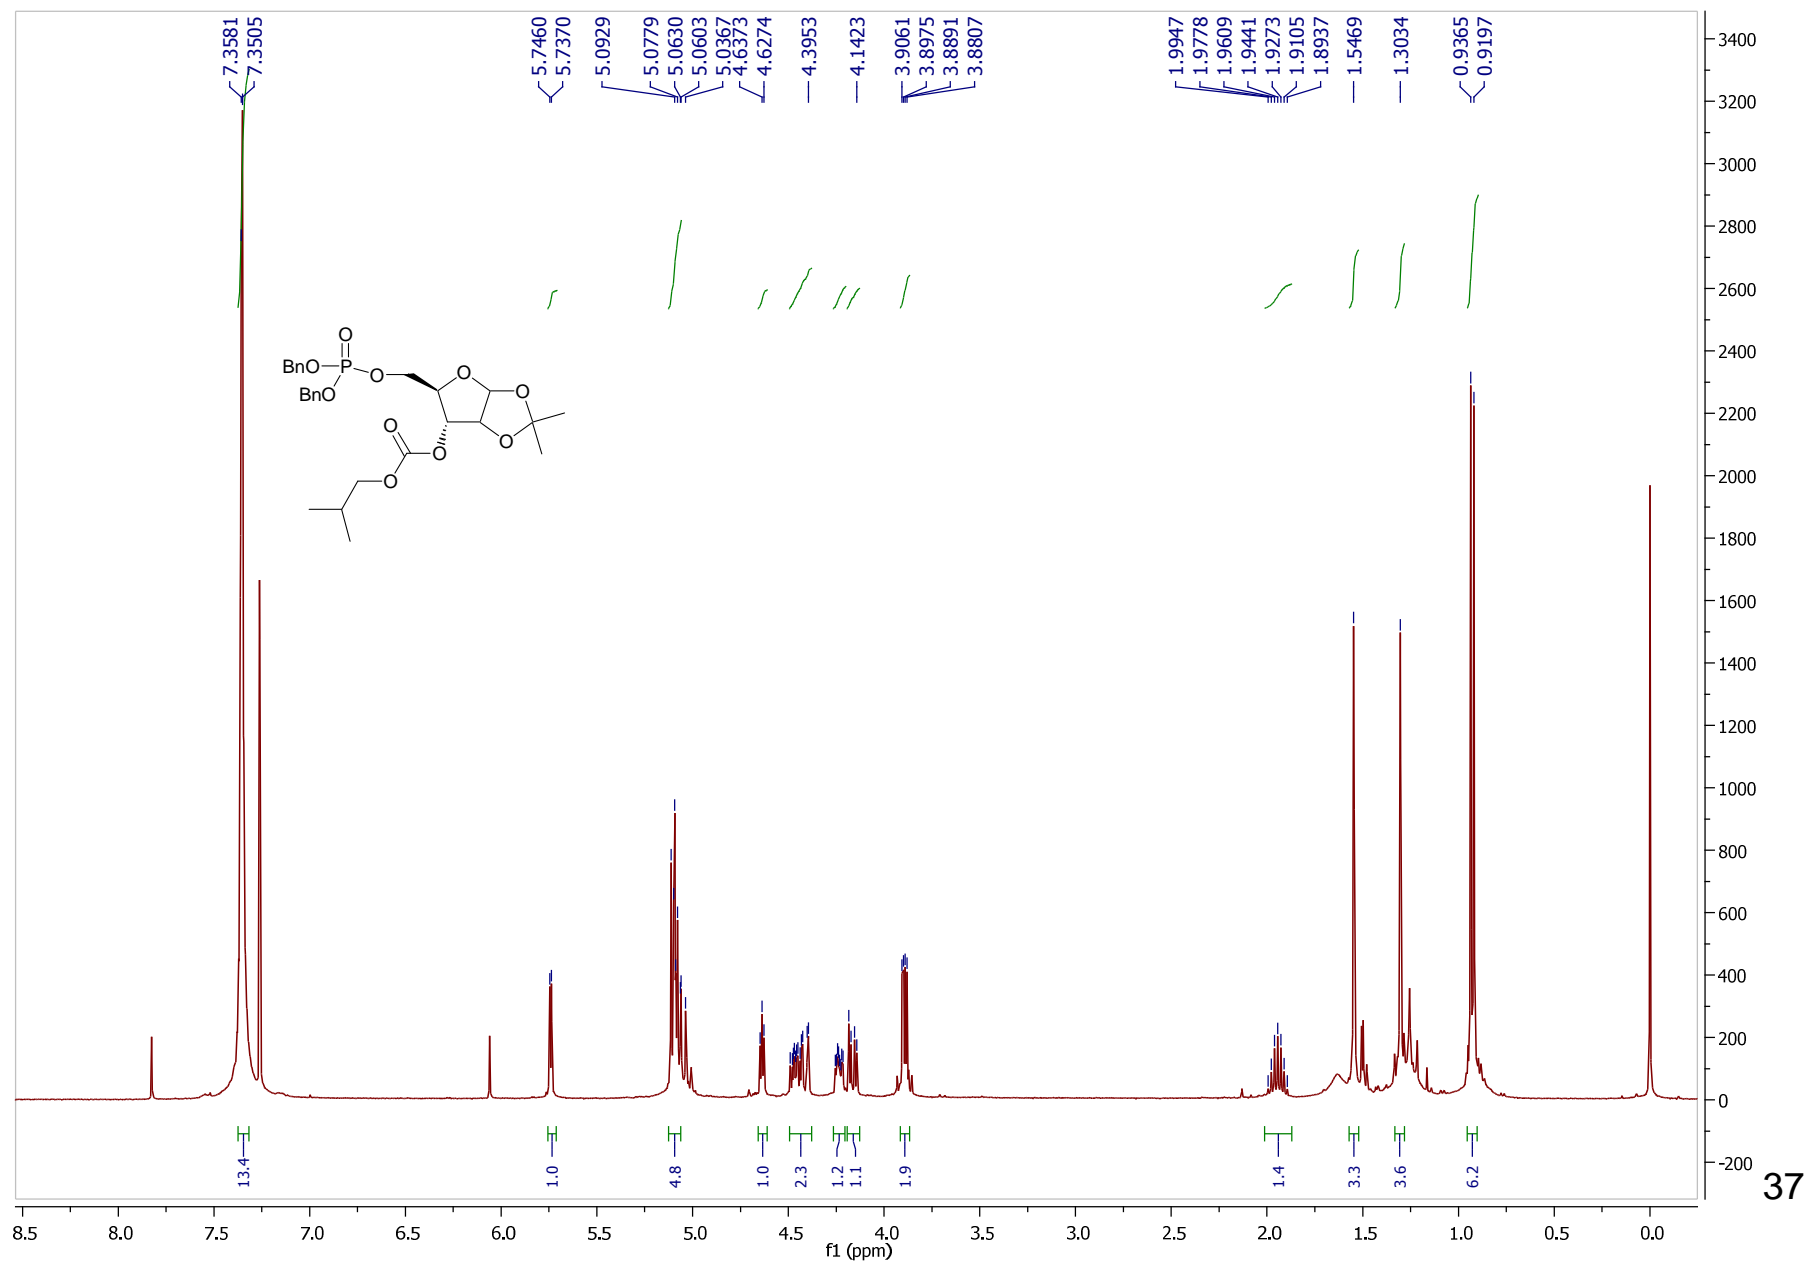

5-O-dibenzylphosphate-1,2-O-isopropylidene-3-O-isobutylcarbonate- $\alpha$ -D-ribofuranoside **10c**:  $^{13}\text{C}$ -NMR

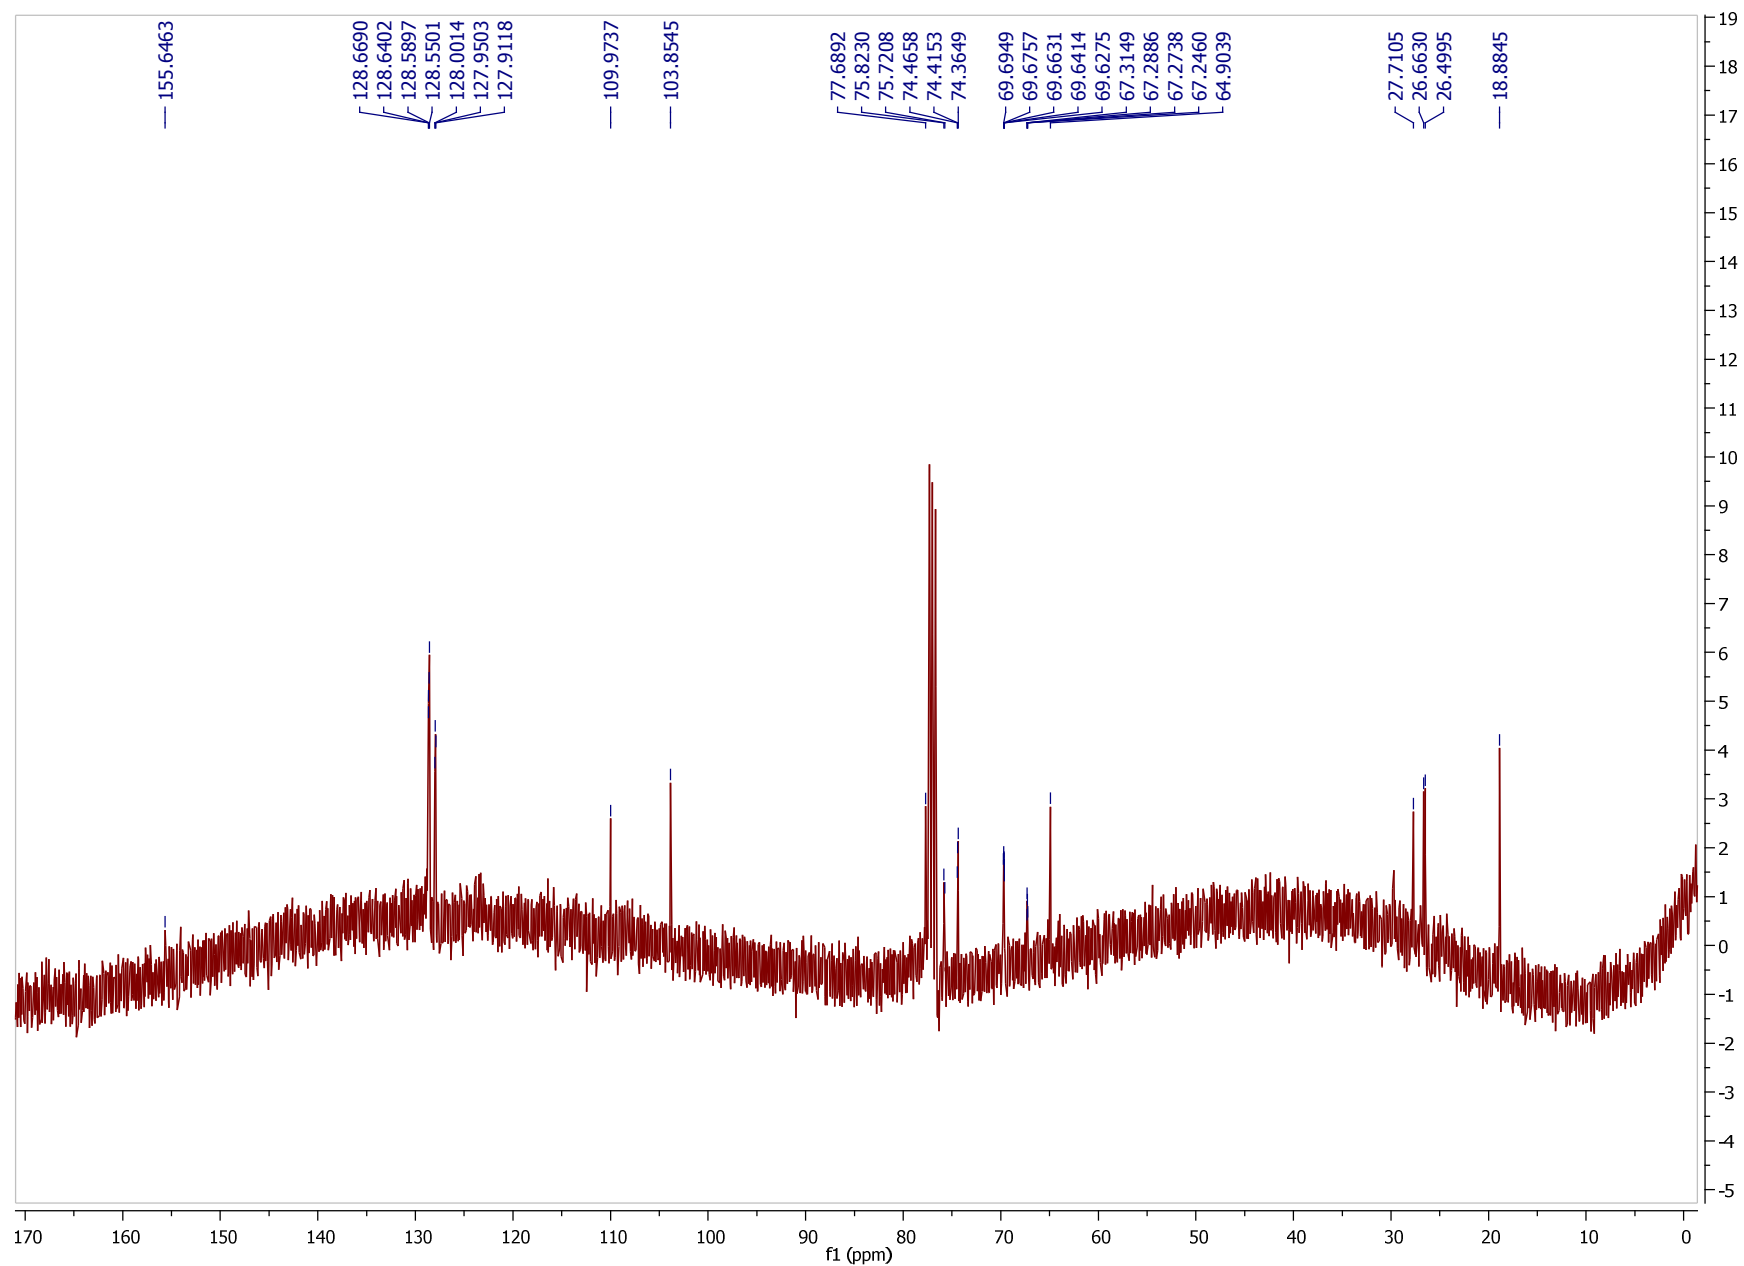

5-O-phosphate-1-O-benzyl-2,3-O-bis(methylcarbonate)- $\beta$ -D-ribofuranoside **12a**:  $^1\text{H-NMR}$

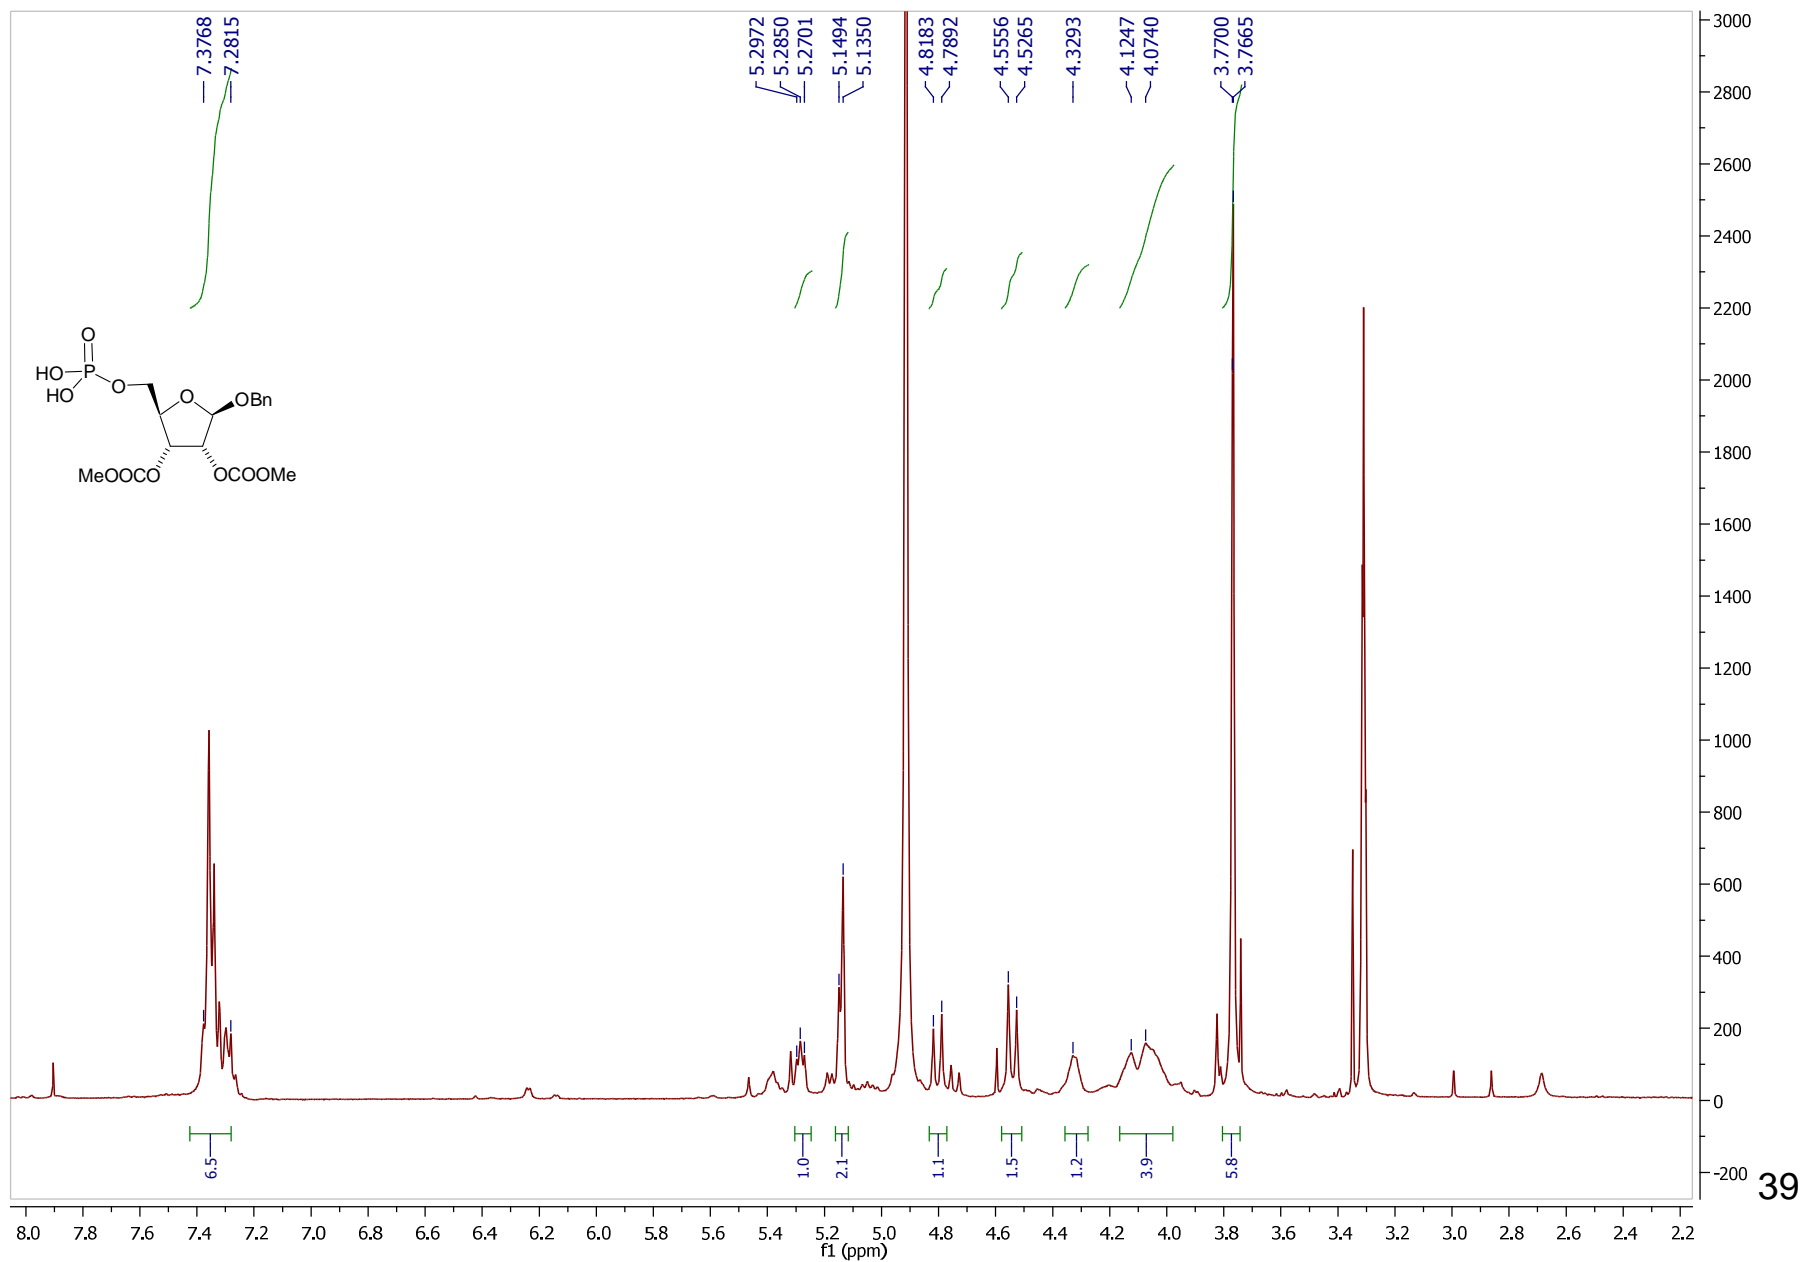

**5-O-phosphate-1-O-benzyl-2,3-O-bis(methylcarbonate)- $\beta$ -D-ribofuranoside 12a:  $^{13}\text{C}$ -NMR**

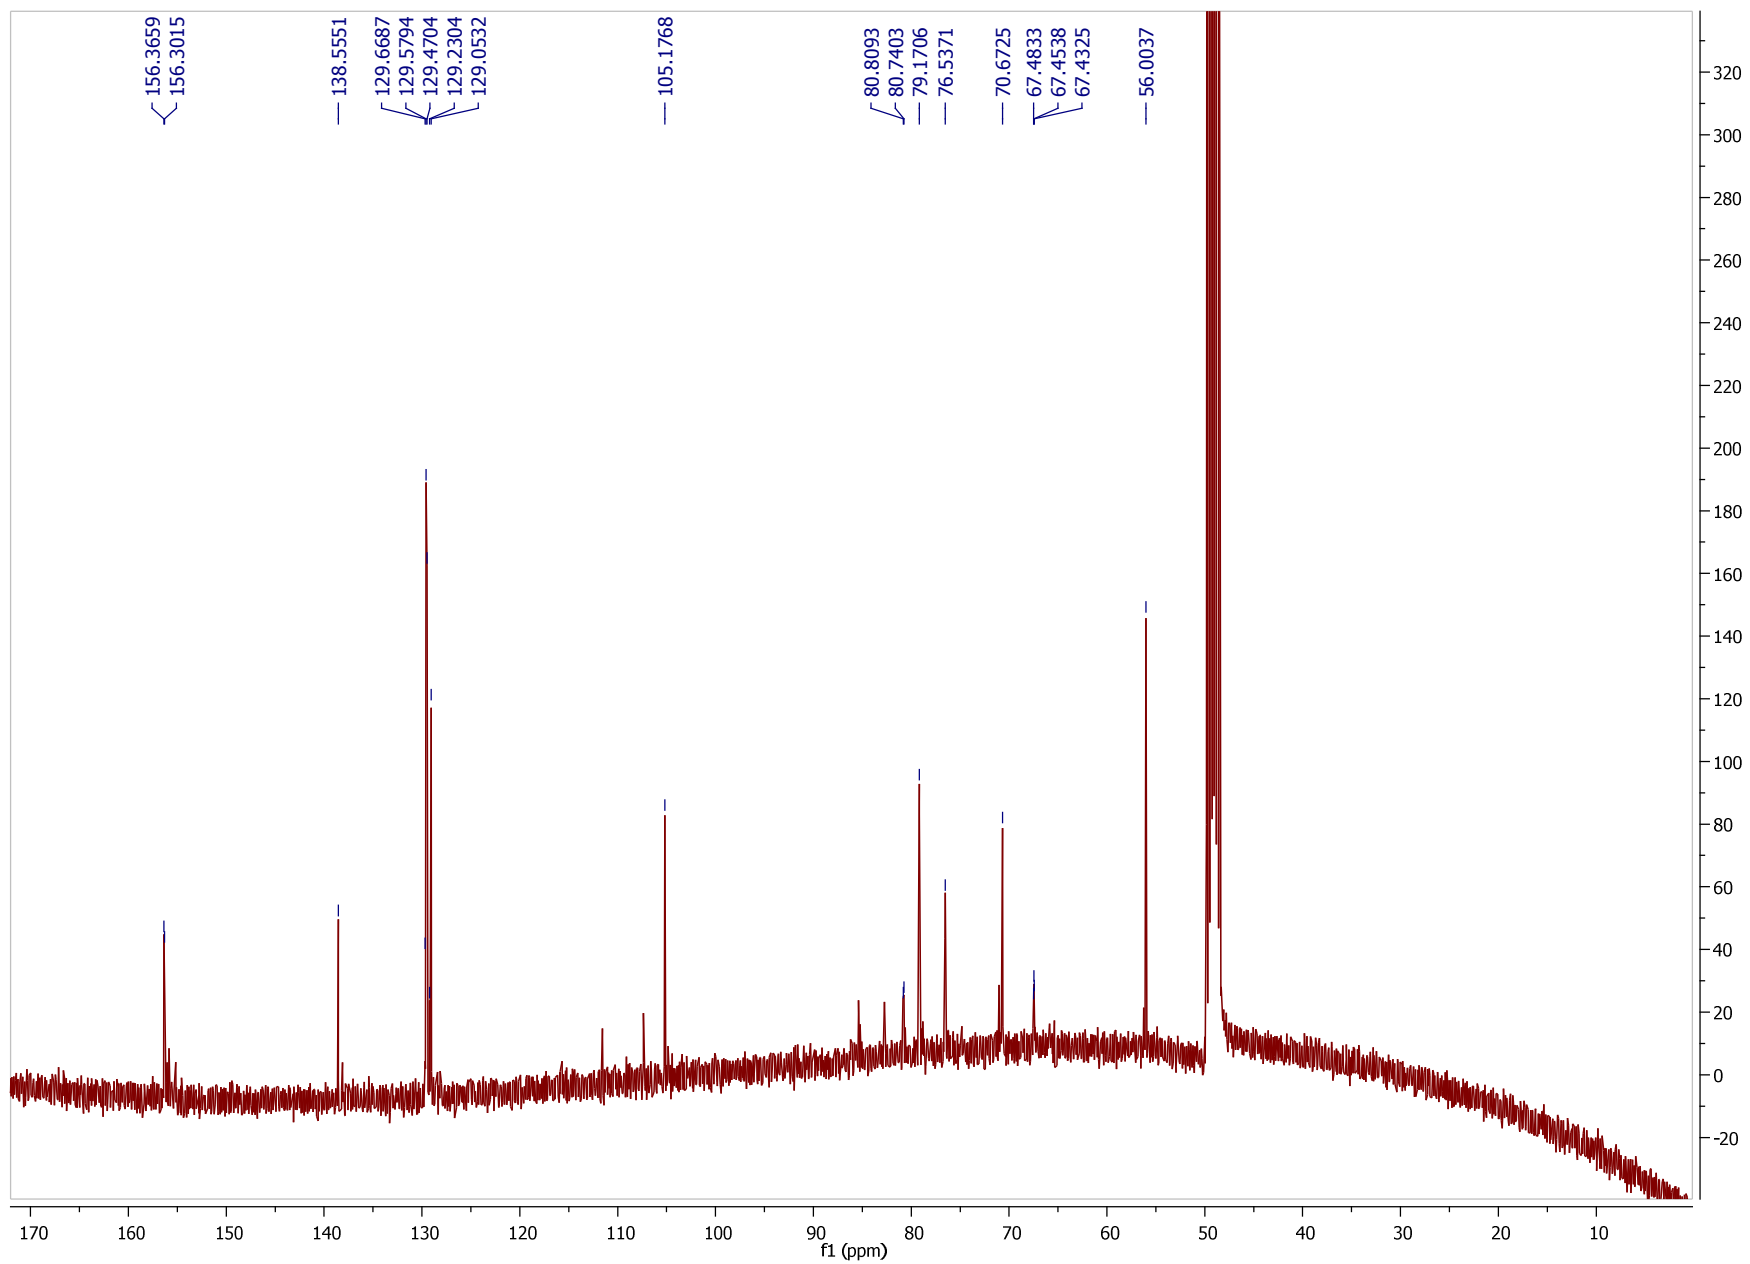



5-O-phosphate-1-O-benzyl-2,3-O-bis(ethylcarbonate)- $\beta$ -D-ribofuranoside **12b**:  $^1\text{H-NMR}$

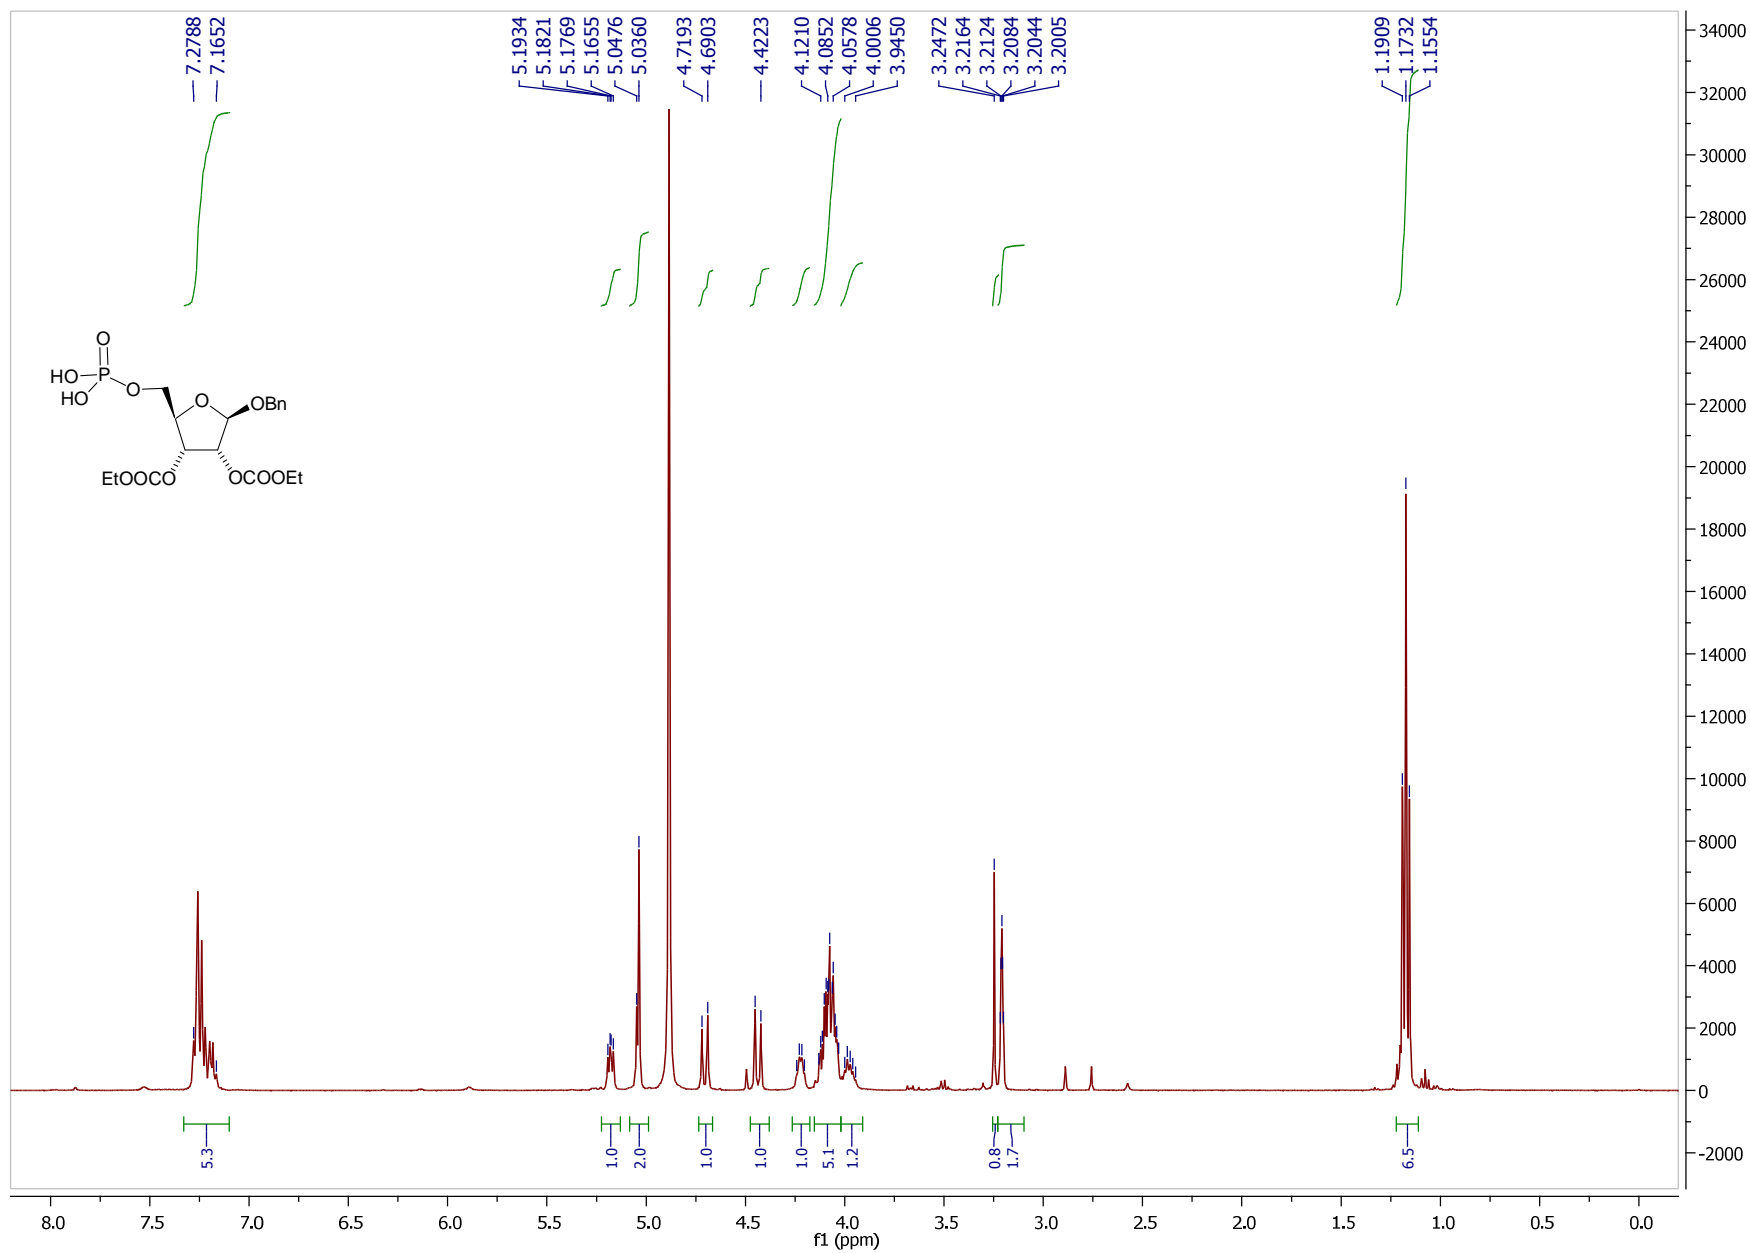

5-O-phosphate-1-O-benzyl-2,3-O-bis(ethylcarbonate)- $\beta$ -D-ribofuranoside **12b**:  $^{13}\text{C}$ -NMR

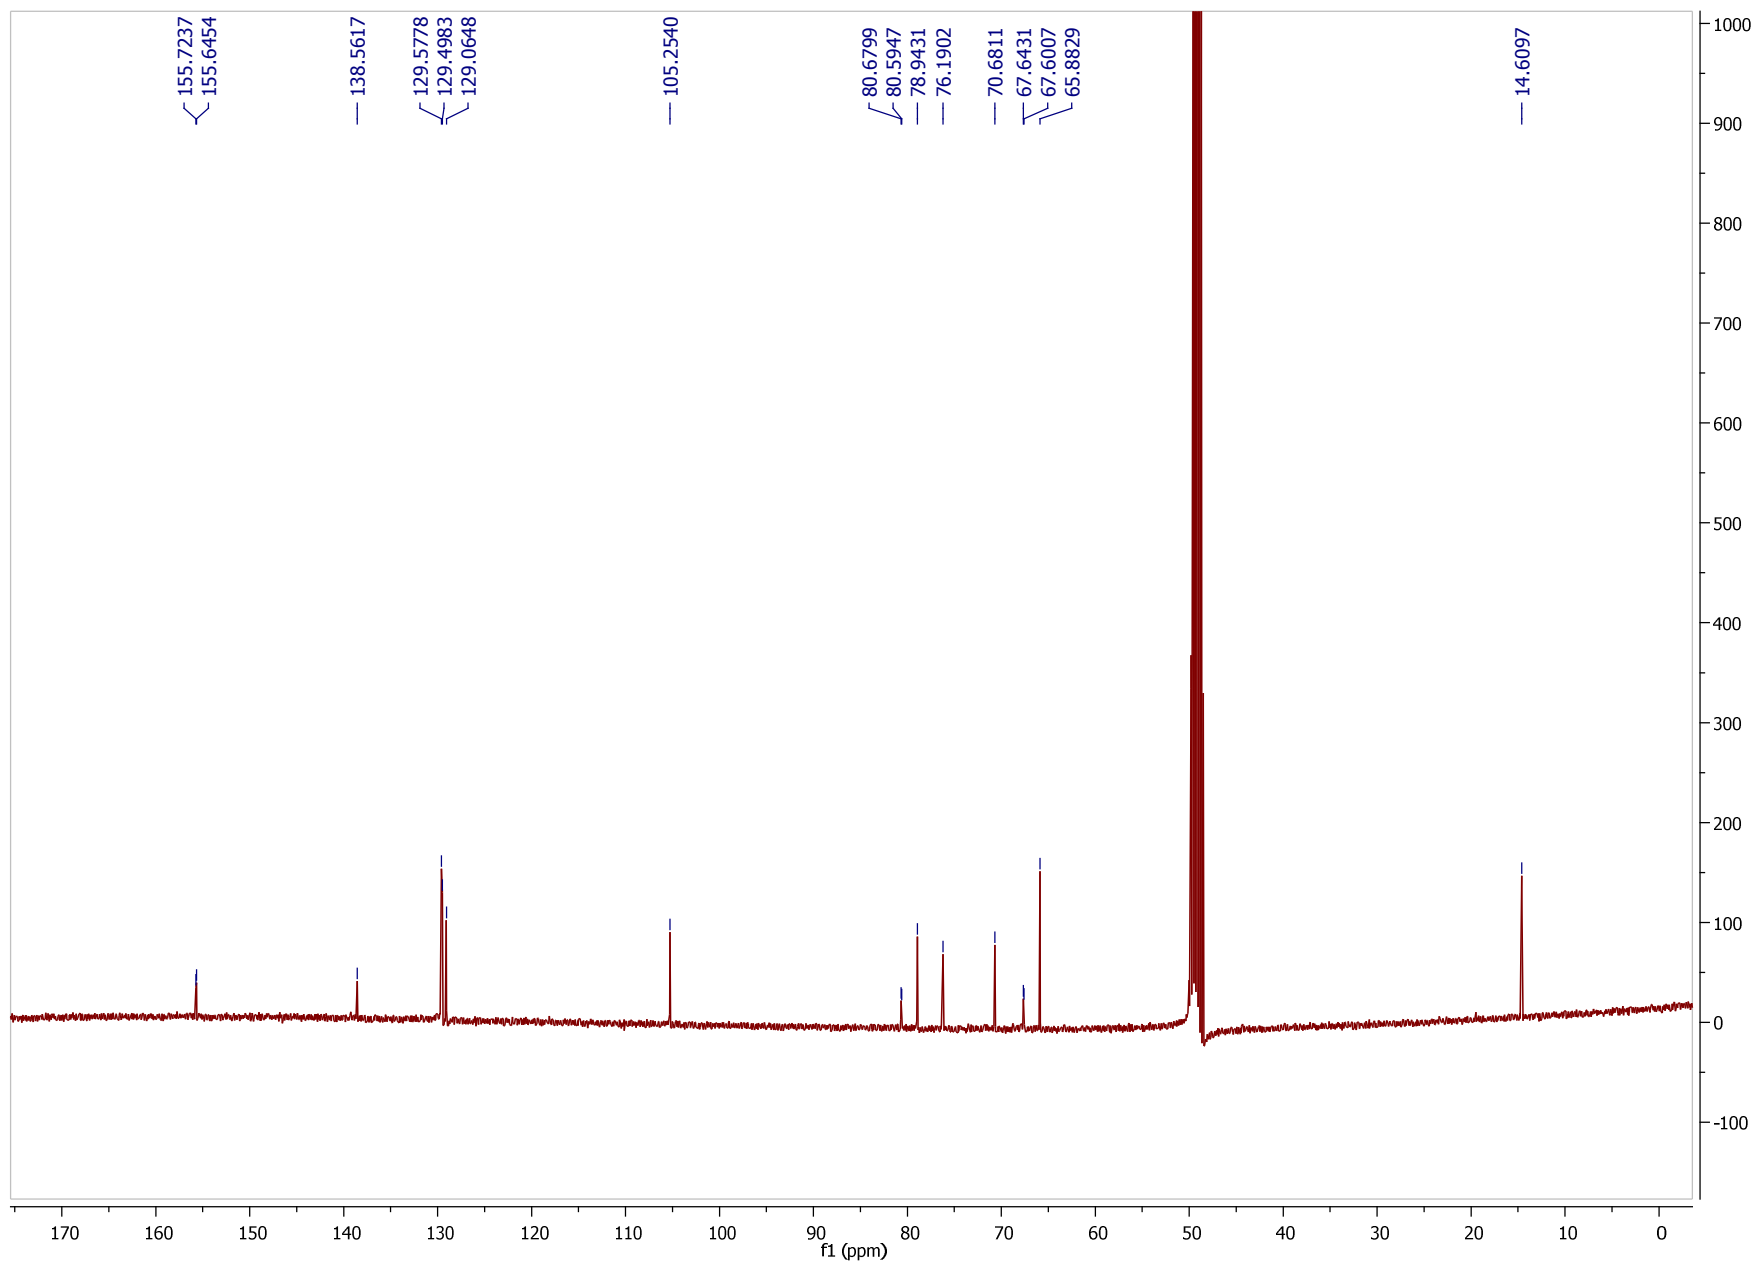

5-O-phosphate-1,2-O-carbonate-3-O-methylcarbonate- $\beta$ -D-ribofuranoside **15a**:  $^1\text{H-NMR}$

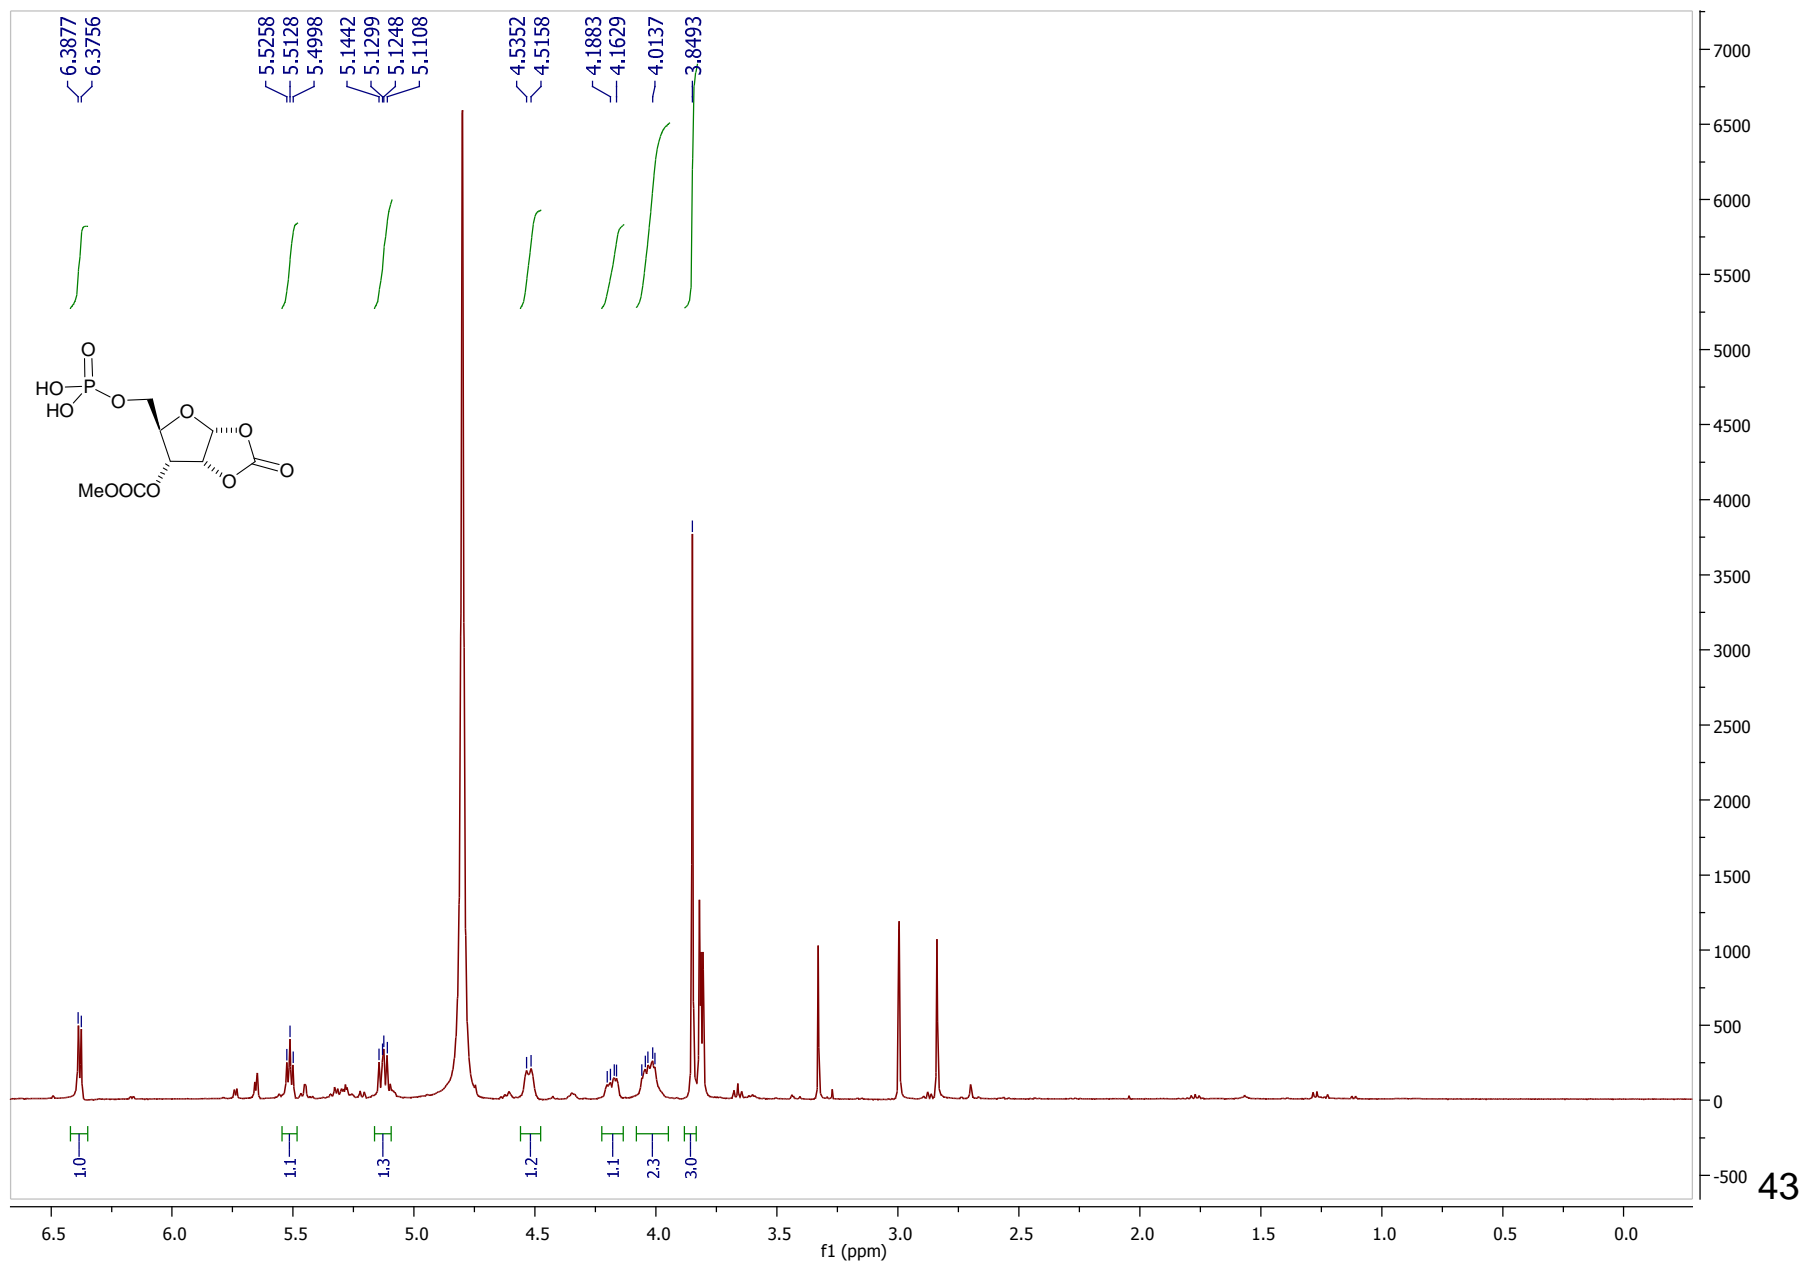

5-O-phosphate-1,2-O-carbonate-3-O-methylcarbonate- $\beta$ -D-ribofuranoside **15a**:  $^{13}\text{C}$ -NMR

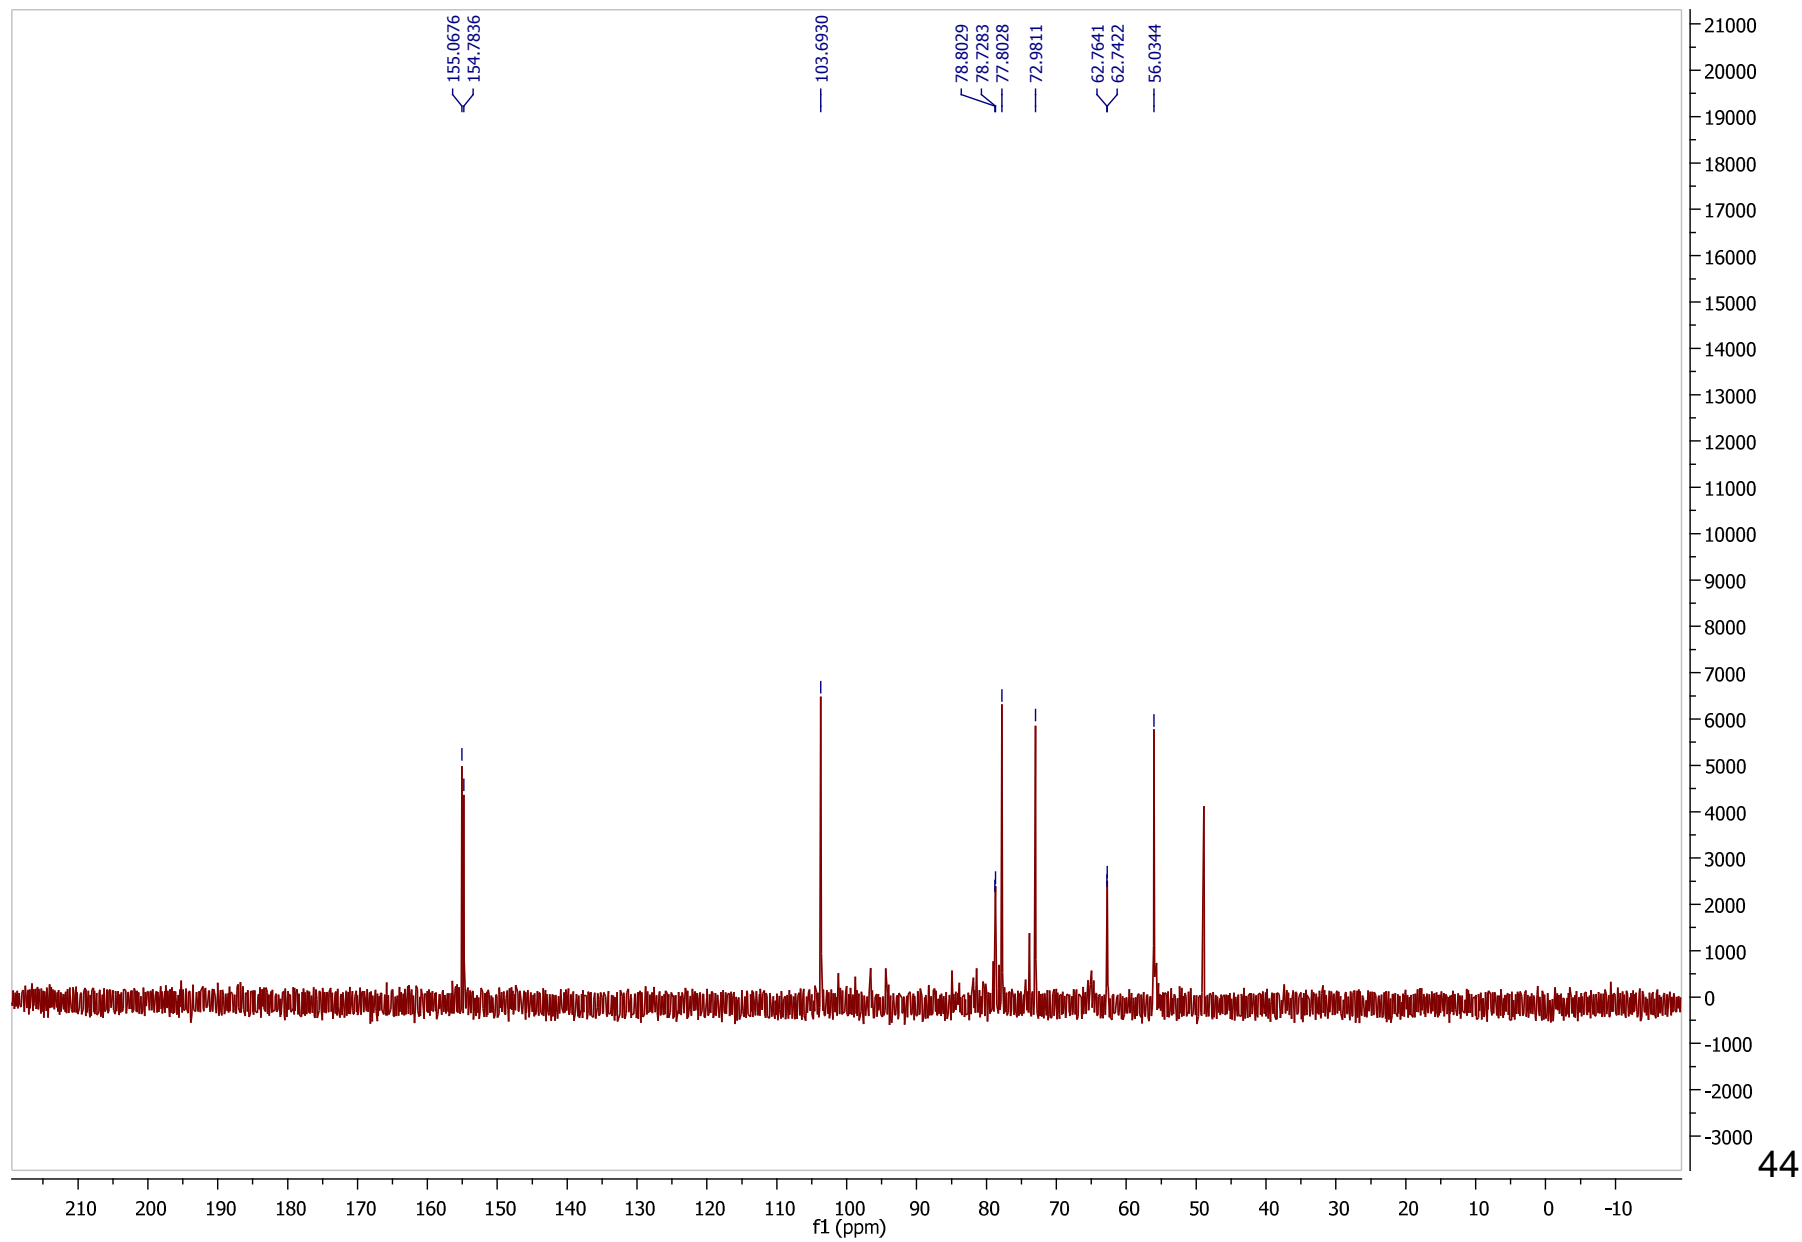

5-O-phosphate-2,3-O-bis(ethylcarbonate)-D-ribofuranoside **13b** in  $\alpha$ - (A) and  $\beta$ - (B) form,  
and 5-O-phosphate-1,2-O-carbonate-3-O-ethylcarbonate- $\beta$ -D-ribofuranoside **15b**:  $^1\text{H-NMR}$

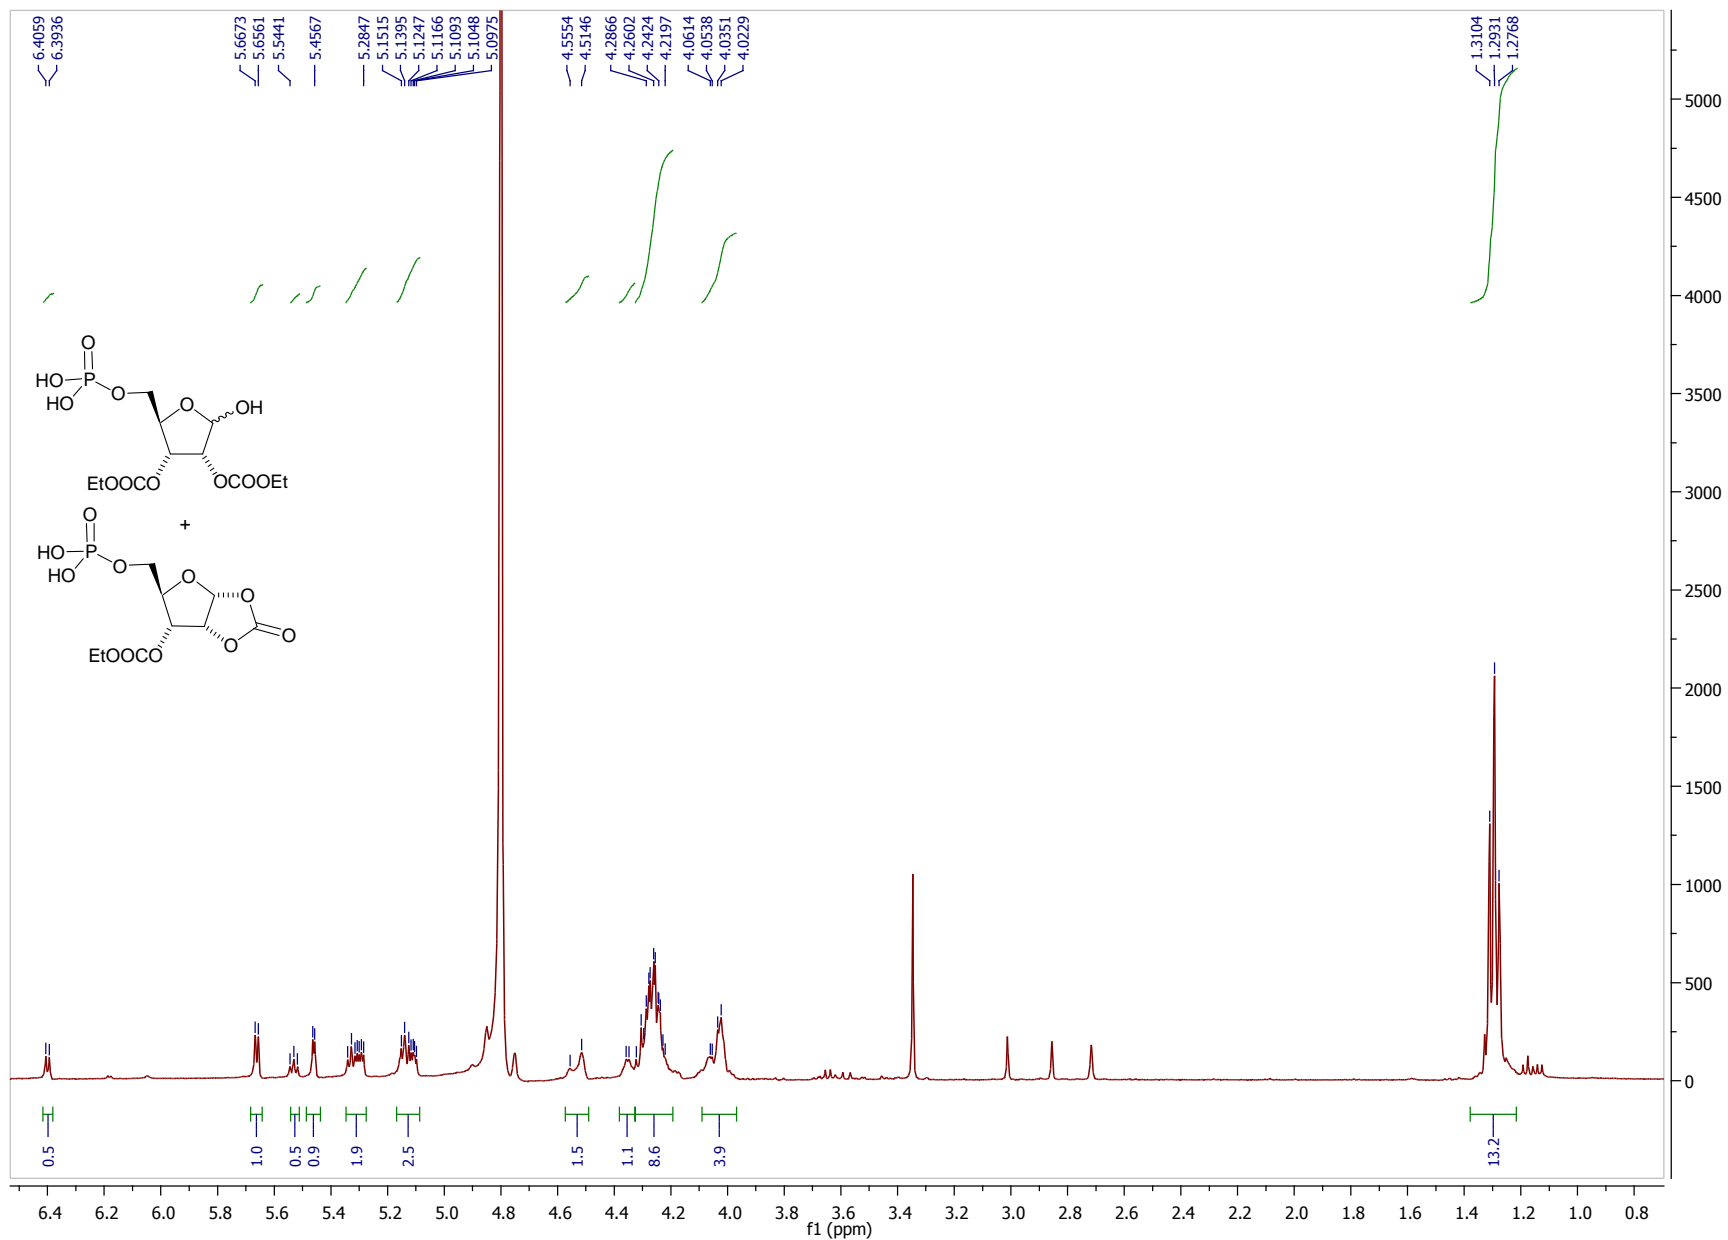

*5-O-phosphate-2,3-O-bis(ethylcarbonate)-D-ribofuranoside 13b* in  $\alpha$ - (A) and  $\beta$ - (B) form,  
and *5-O-phosphate-1,2-O-carbonate-3-O-ethylcarbonate- $\beta$ -D-ribofuranoside 15b*:  $^{13}\text{C}$ -NMR

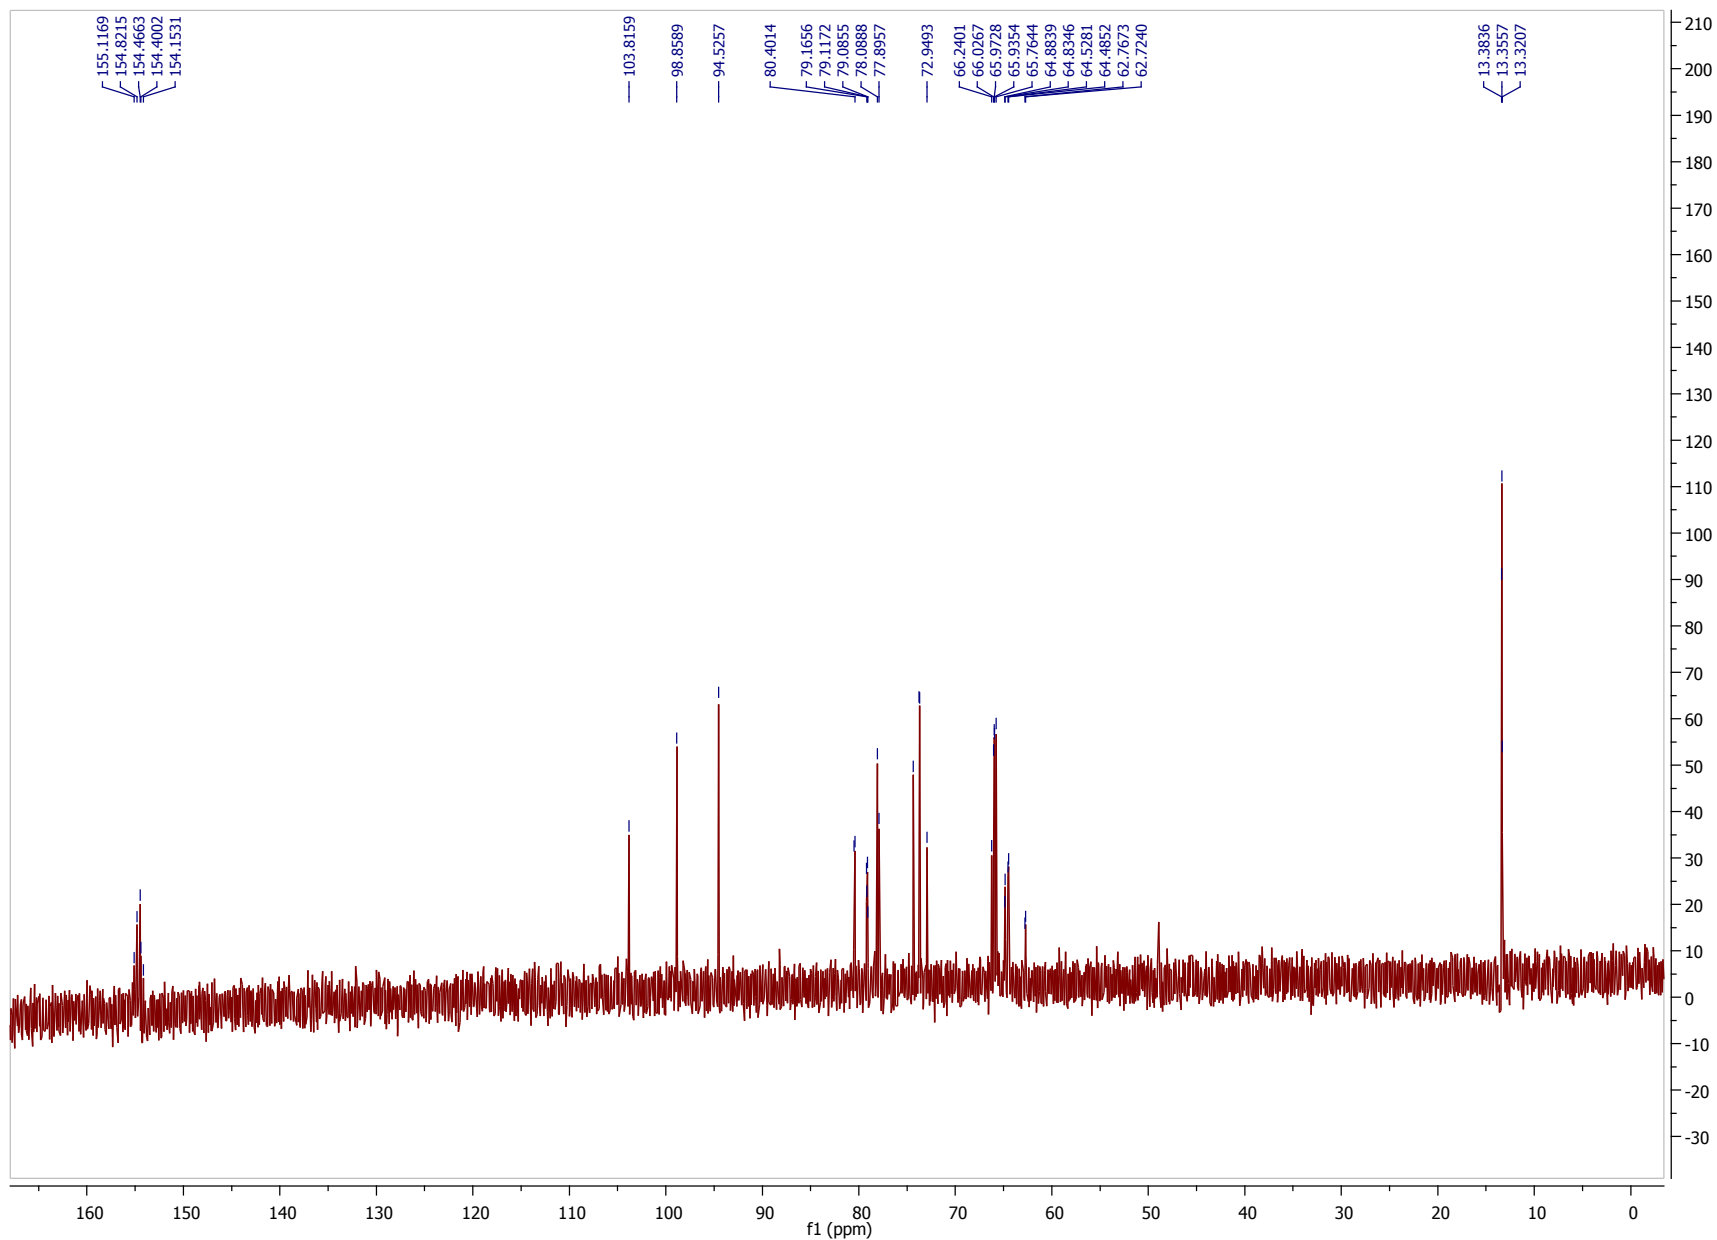

5-O-phosphate-1,2-O-carbonate-3-O-isobutylcarbonate-β-D-ribofuranoside **15c**: <sup>1</sup>H-NMR

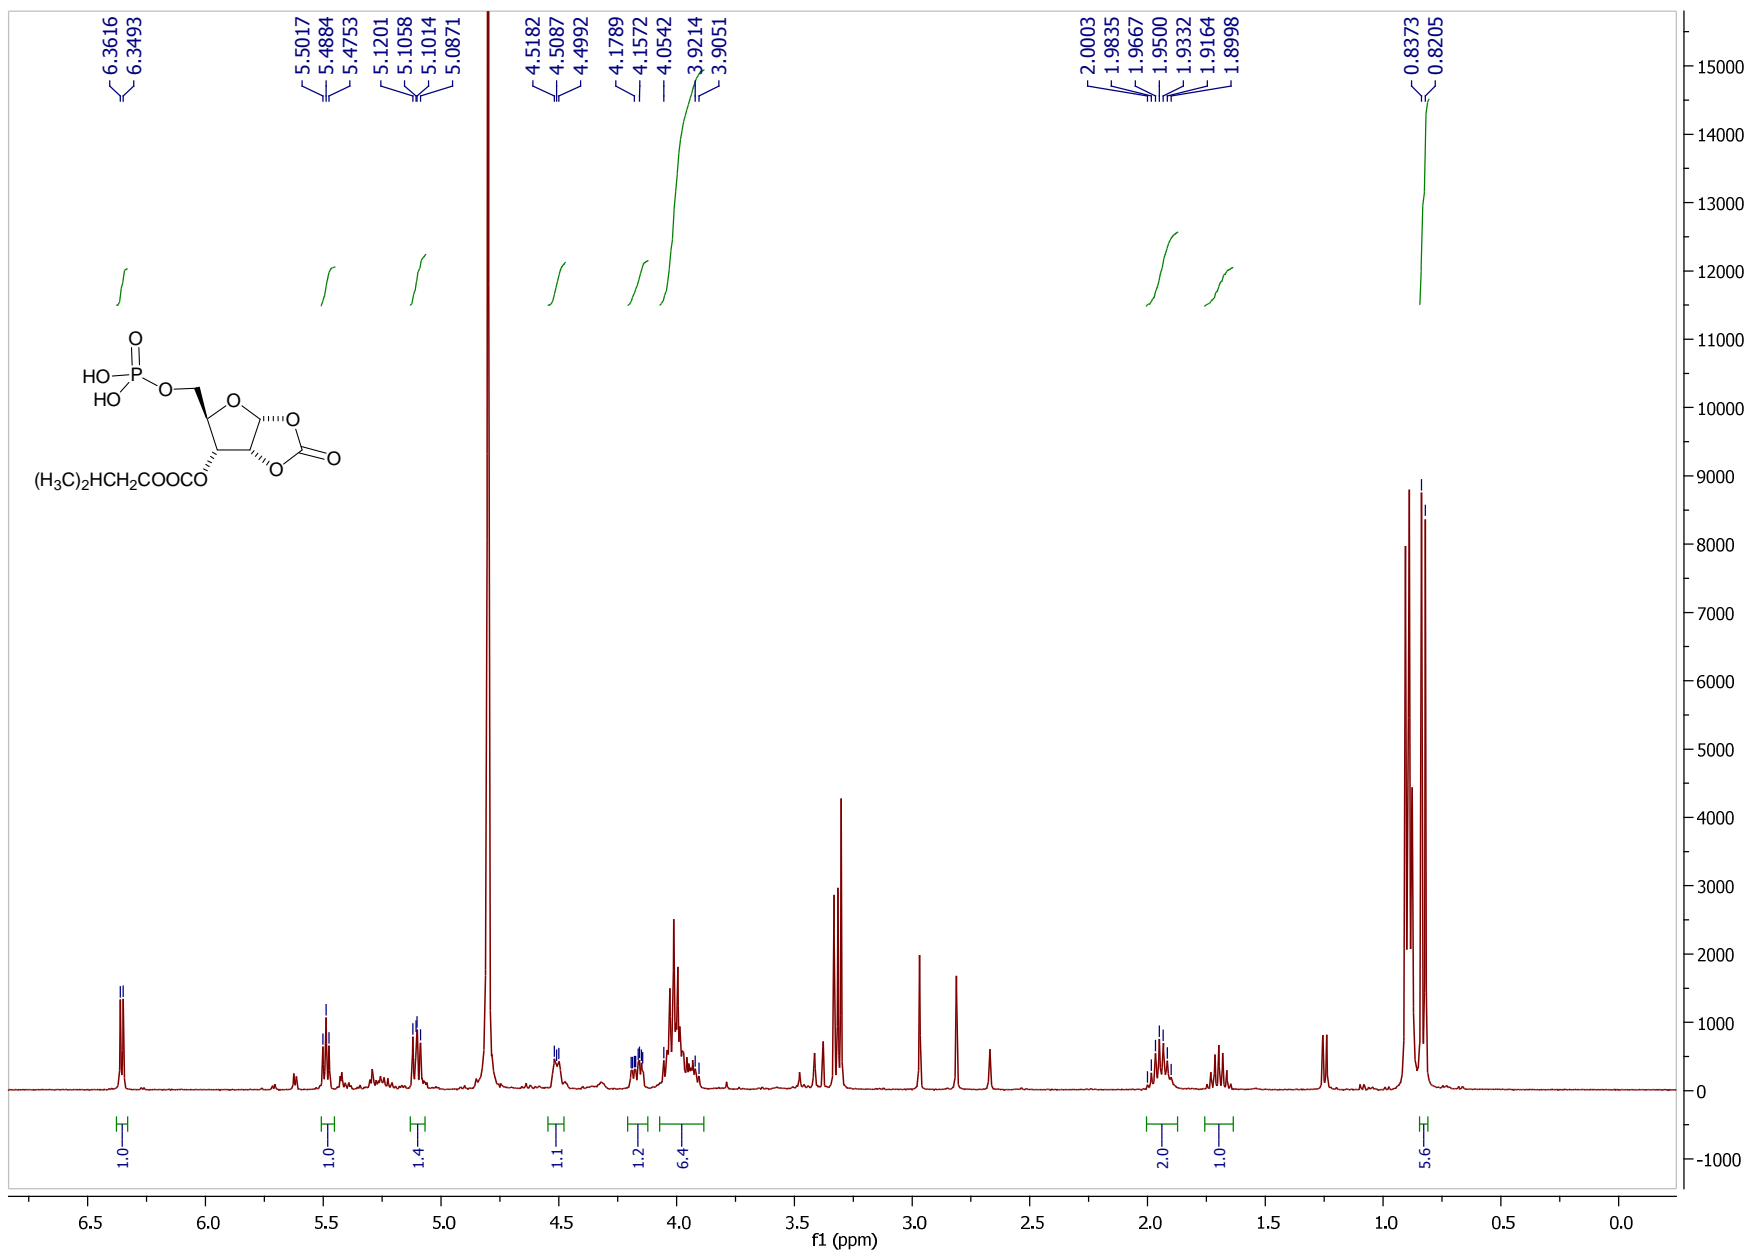

5-O-phosphate-1,2-O-carbonate-3-O-isobutylcarbonate- $\beta$ -D-ribofuranoside **15c**:  $^{13}\text{C}$ -NMR

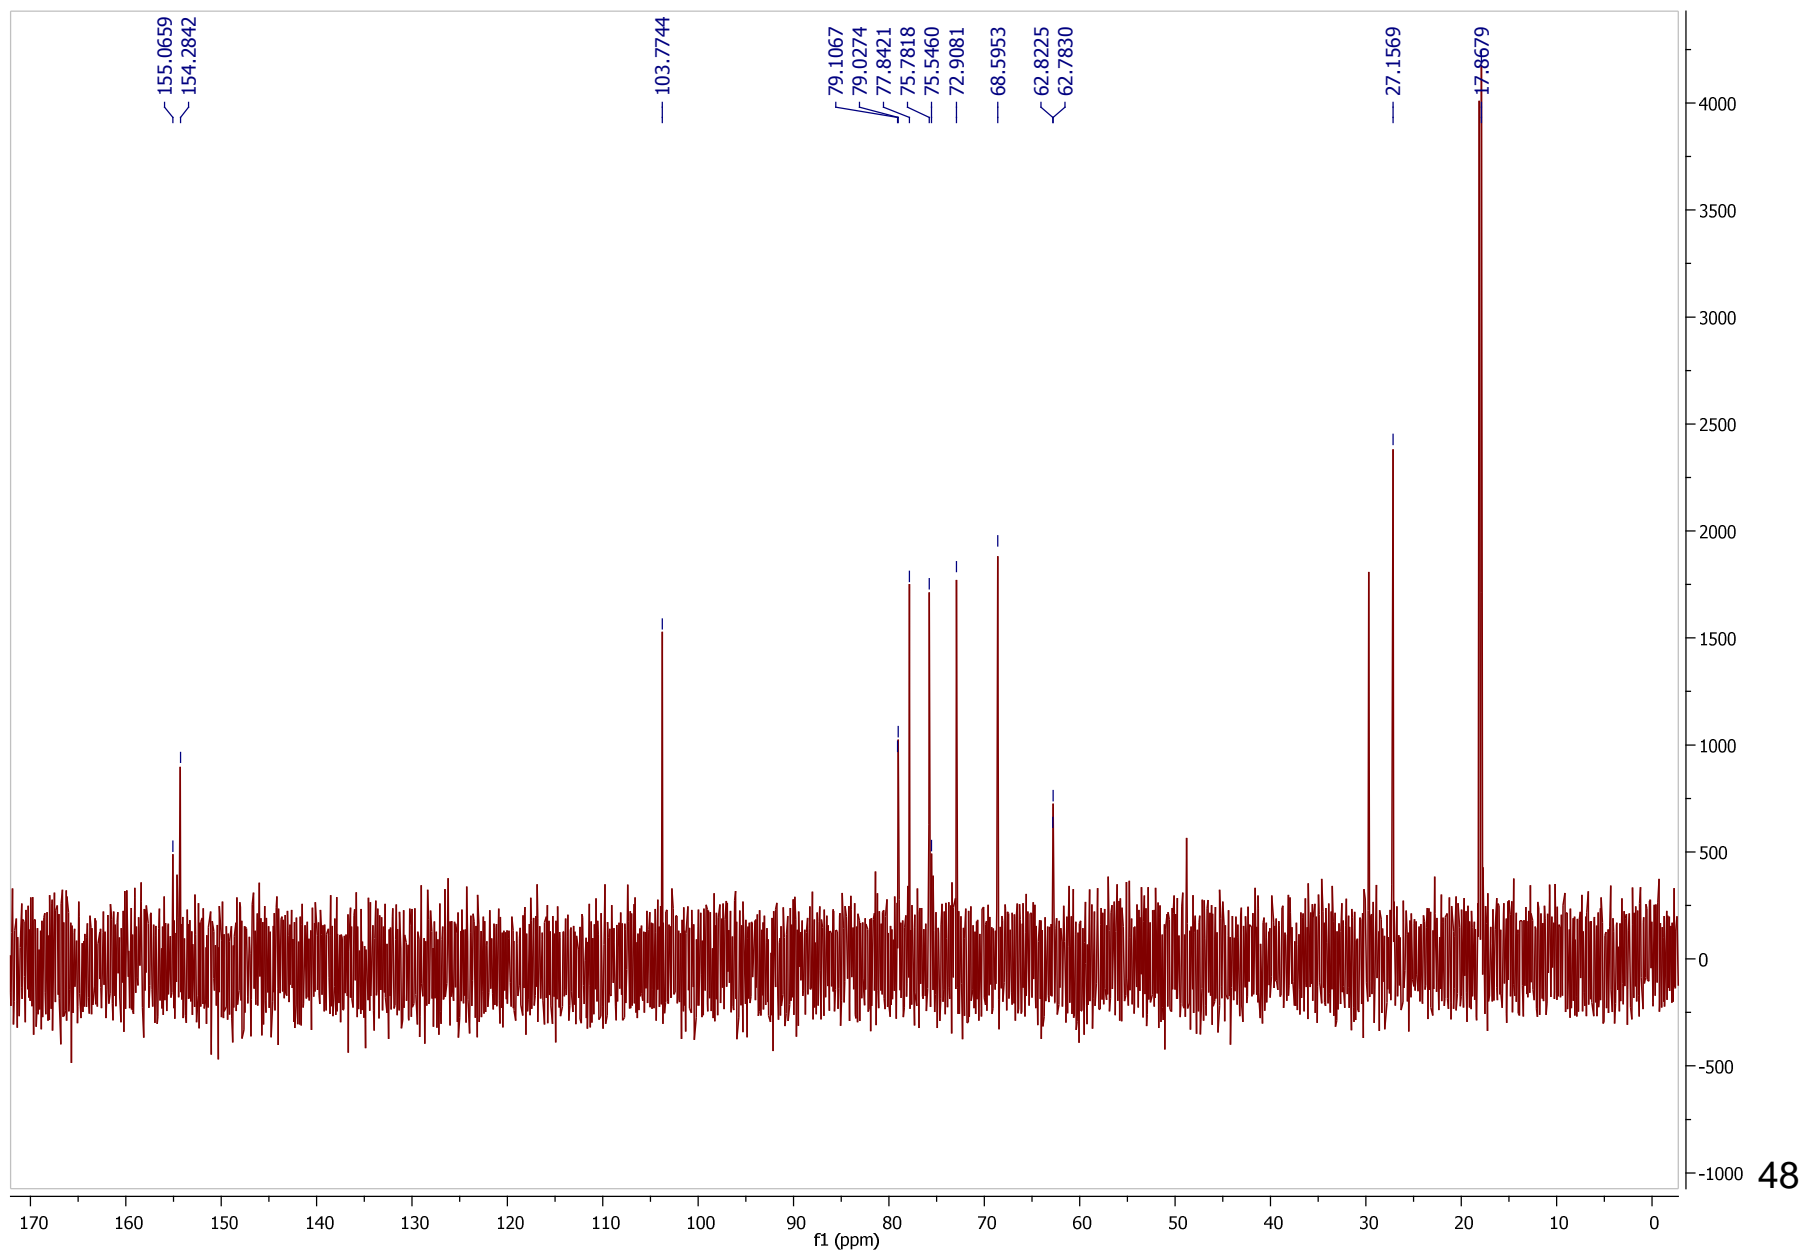



5-O-phosphate-2,3-O-carbonate- $\beta$ -D-ribofuranose **11d**:  $^1\text{H-NMR}$

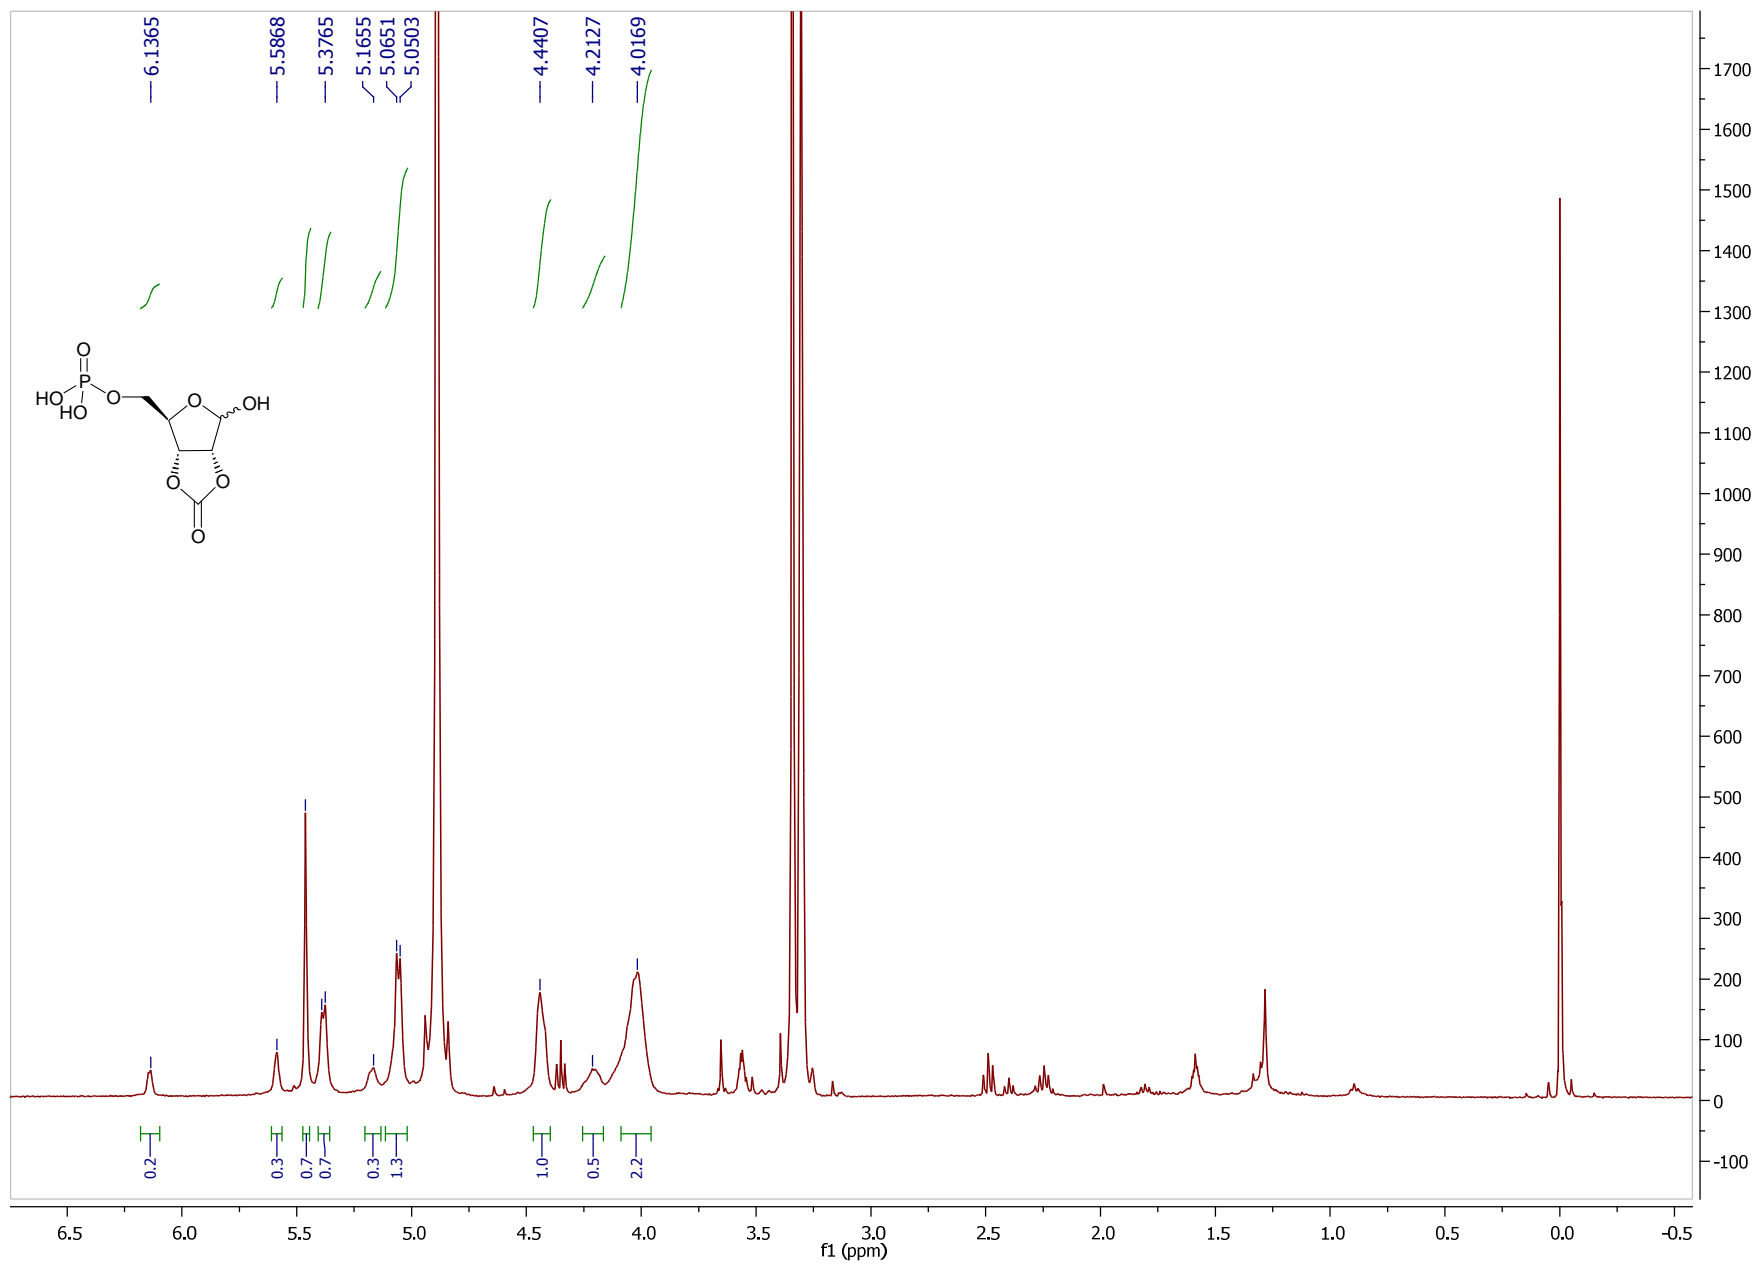

5-O-phosphate-2,3-O-carbonate- $\beta$ -D-ribofuranose **11d**: HSQC

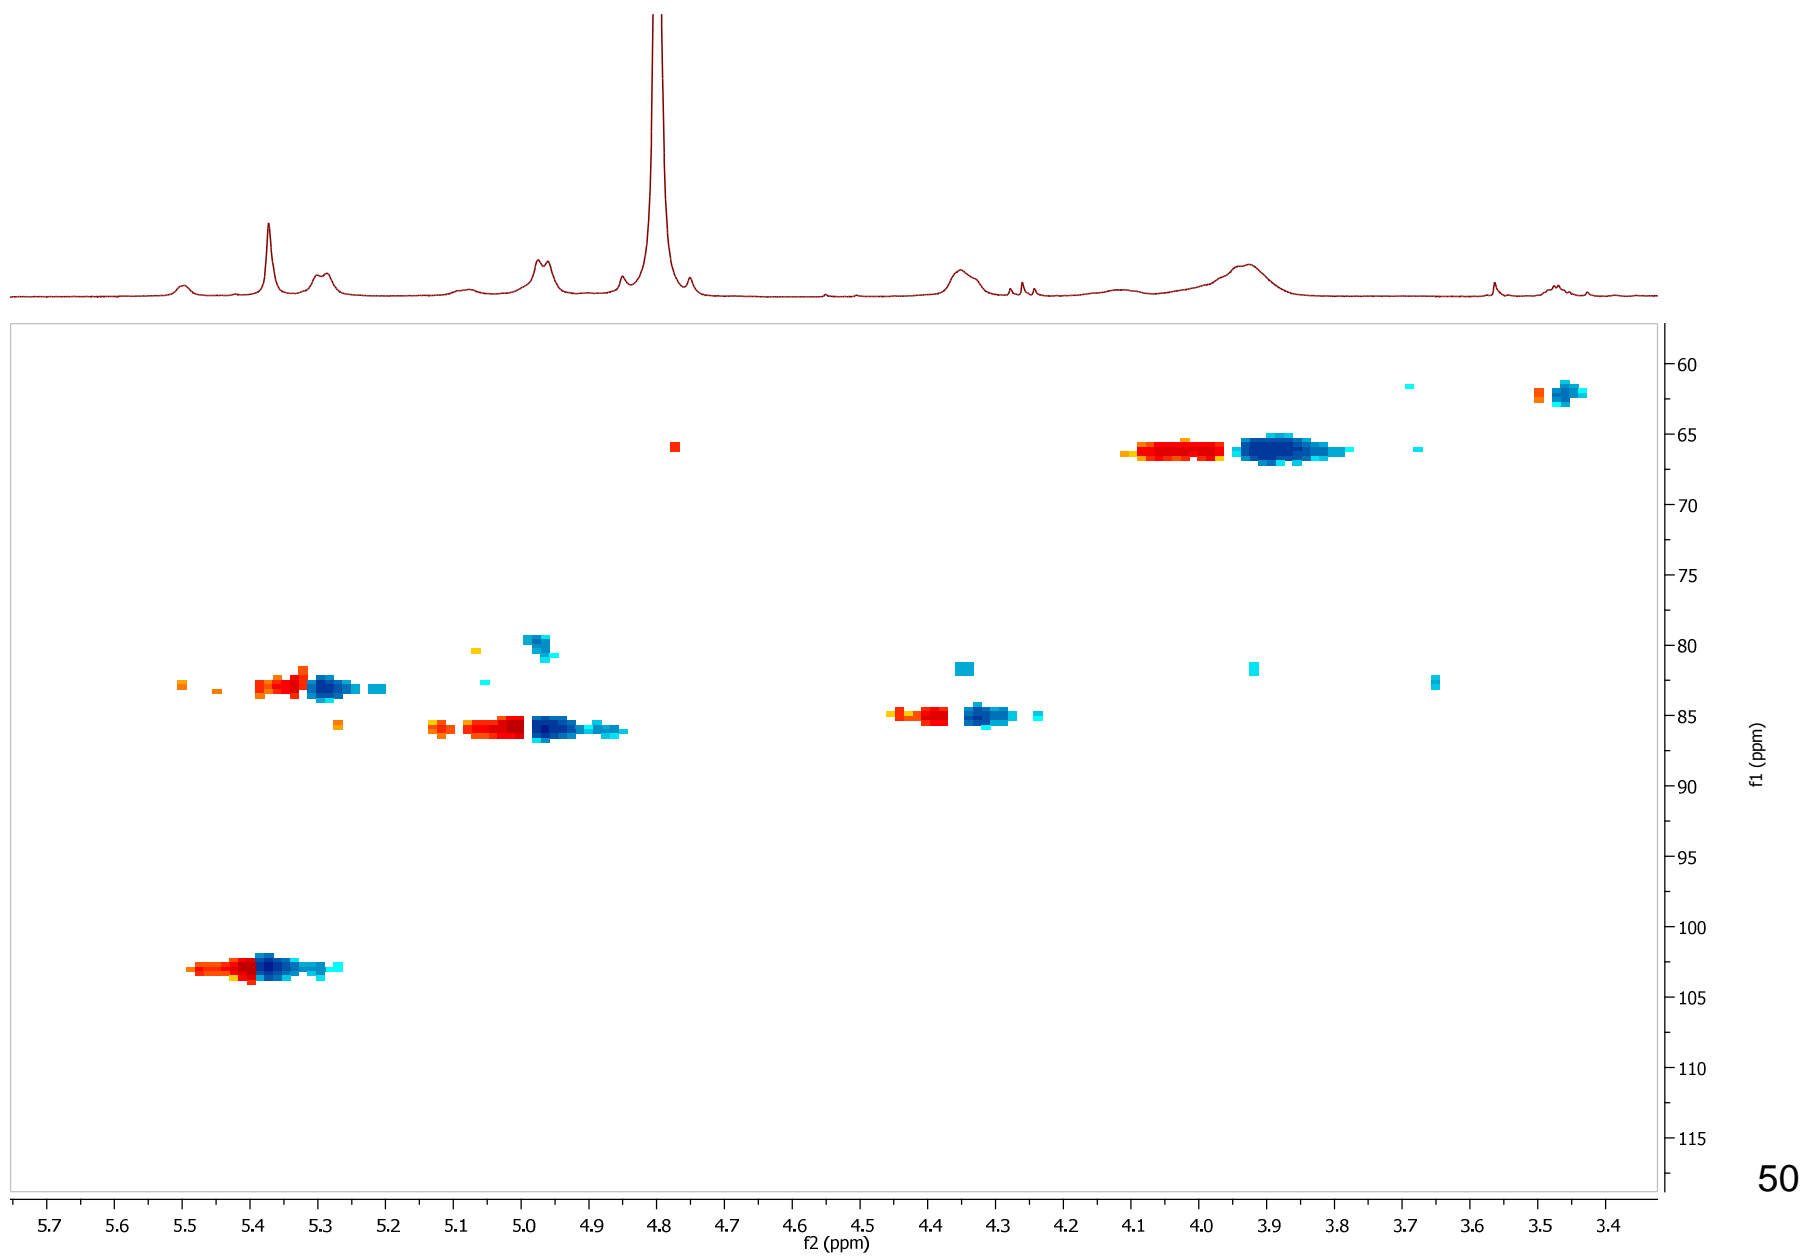

2',3'-O-carbonate-ADP-ribose **13d** ( $\alpha$ - and  $\beta$ -anomers) + 1',2'-O-carbonate-ADP-ribose **13e**:  $^1\text{H-NMR}$

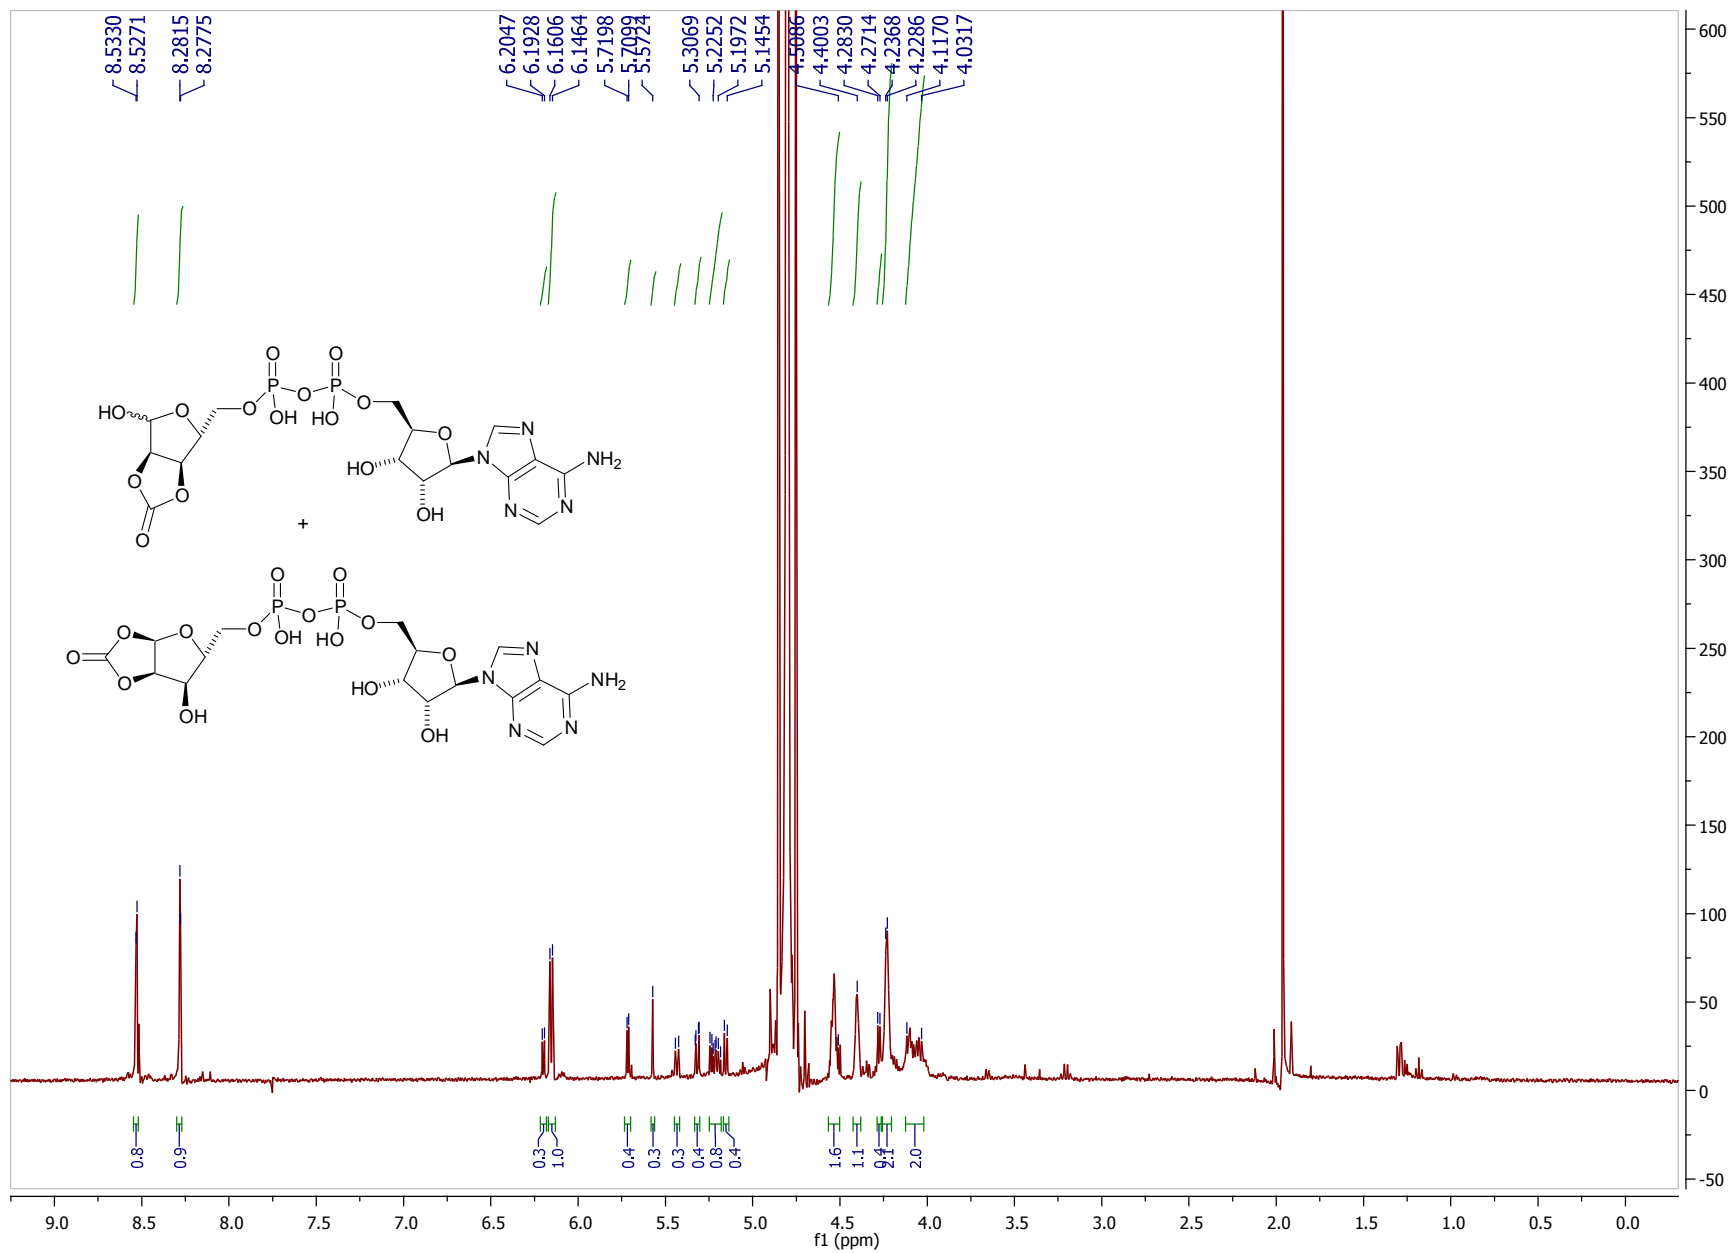

*2',3'-O-carbonate-ADP-ribose 13d* ( $\alpha$ - and  $\beta$ -anomers) + *1',2'-O-carbonate-ADP-ribofuraside 13e*:  $^{13}\text{C}$ -NMR

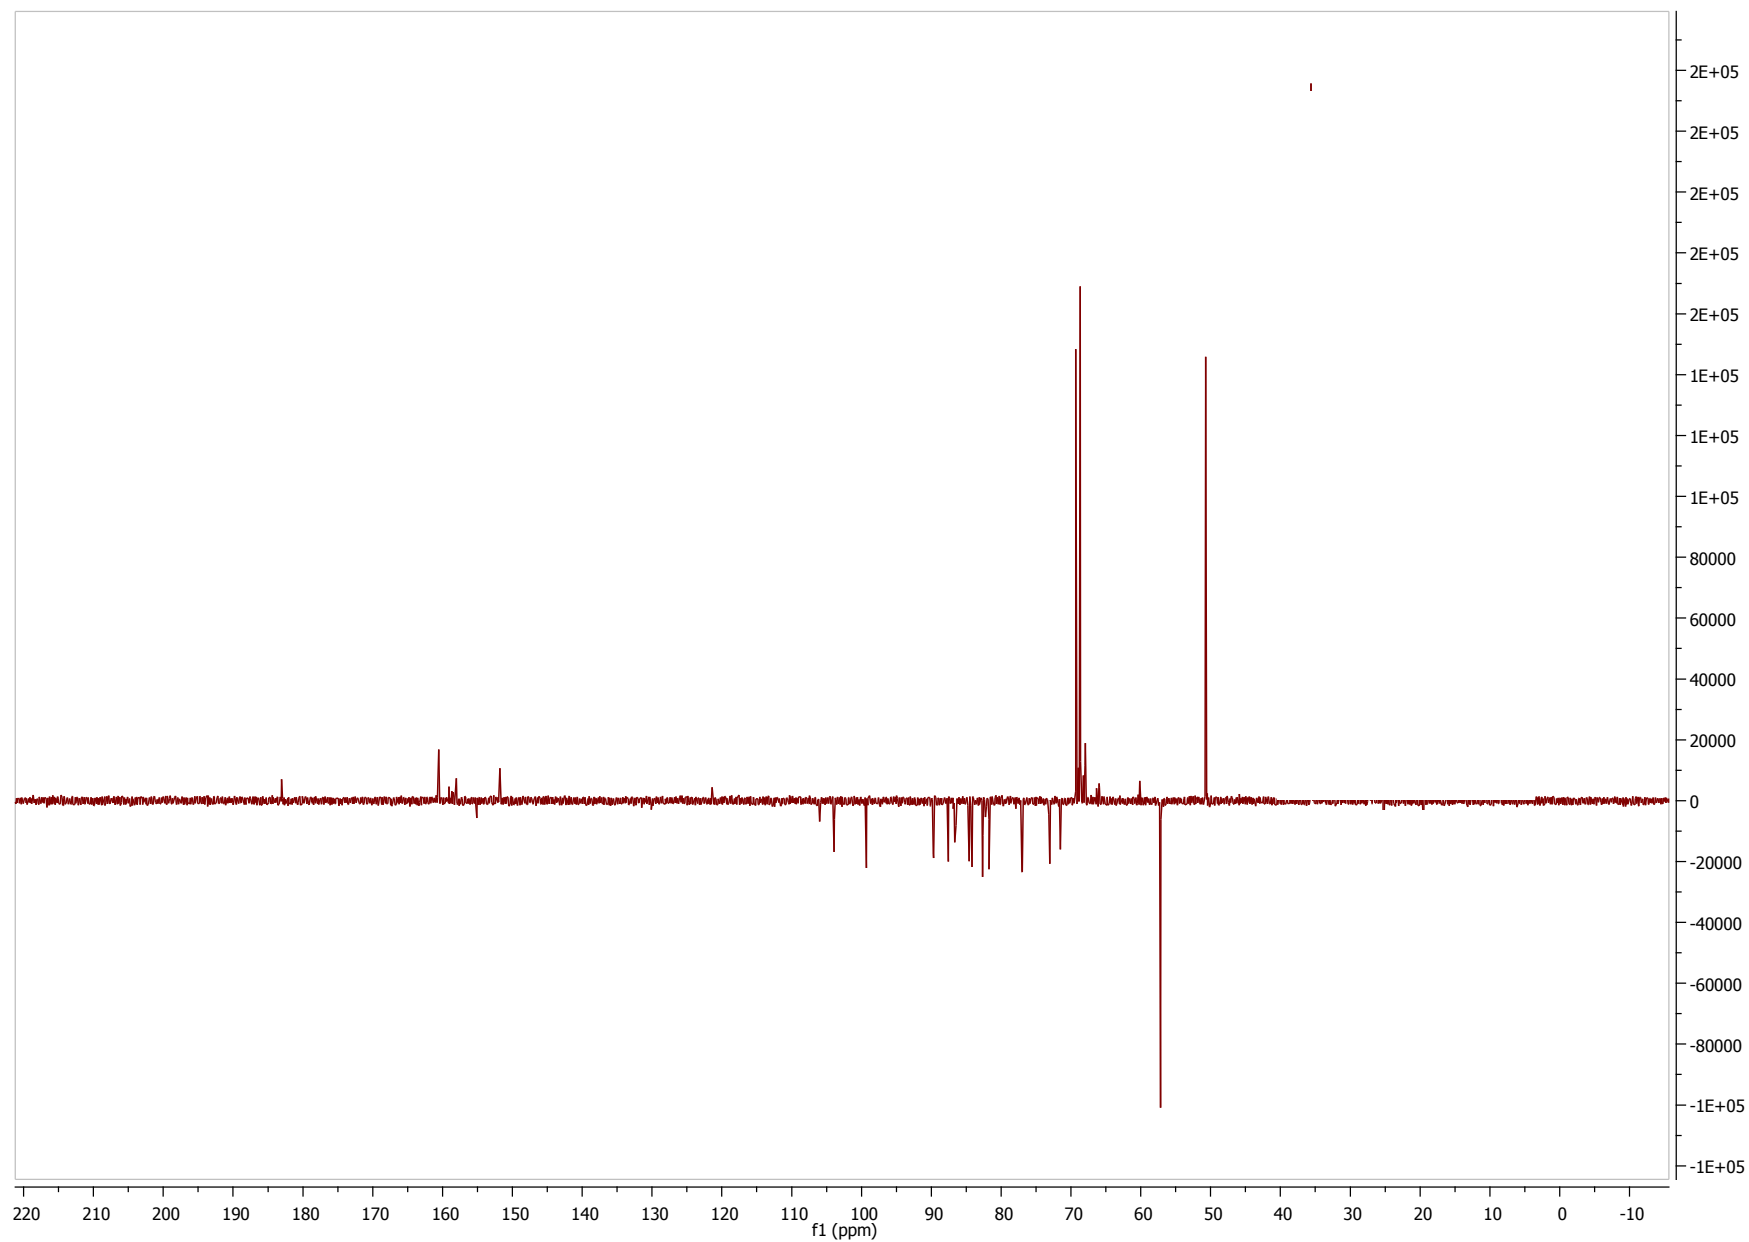

1',2'-O-carbonate-3'-O-methylcarbonate-ADP-ribofuranoside **16a**: <sup>1</sup>H-NMR

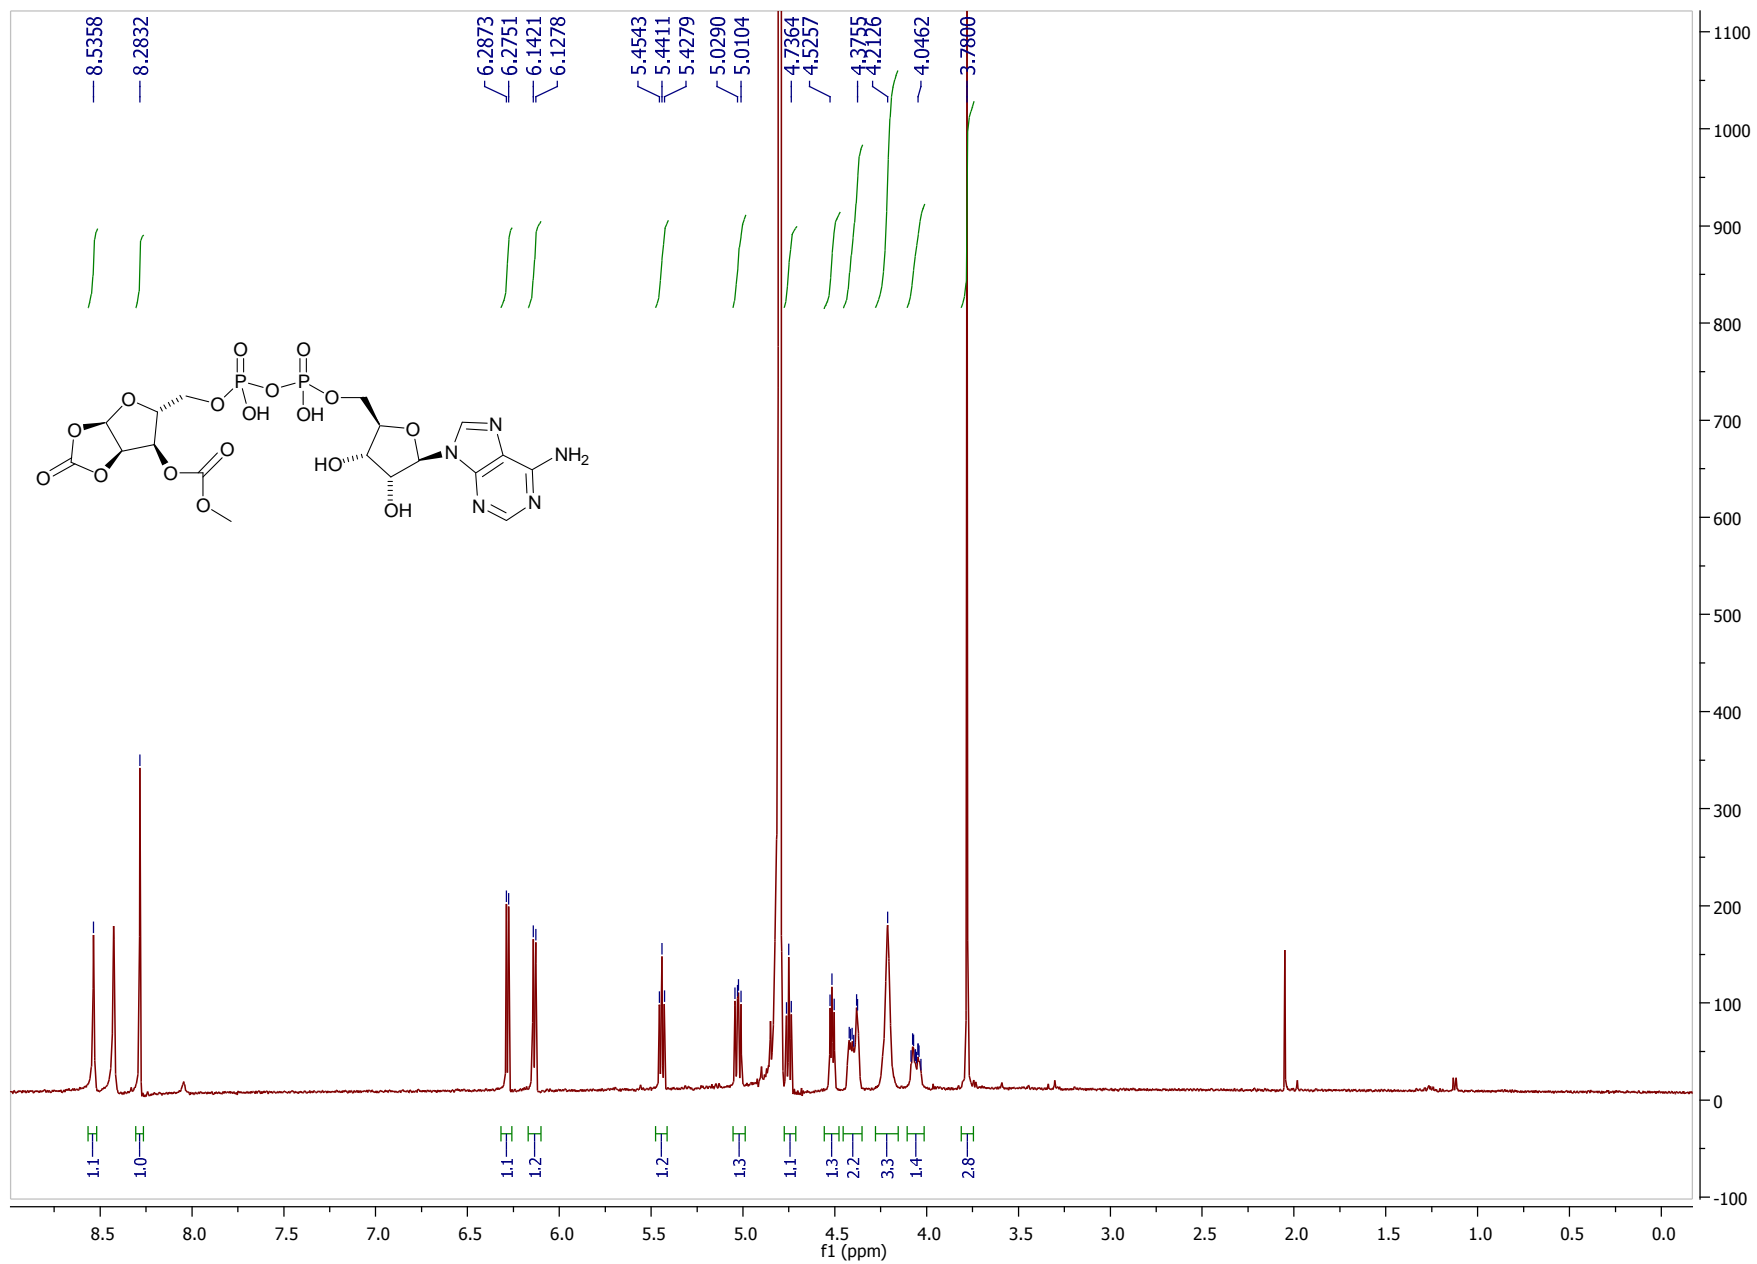

*1',2'-O-carbonate-3'-O-methylcarbonate-ADP-ribofuranoside 16a*:  $^{13}\text{C}$ -NMR

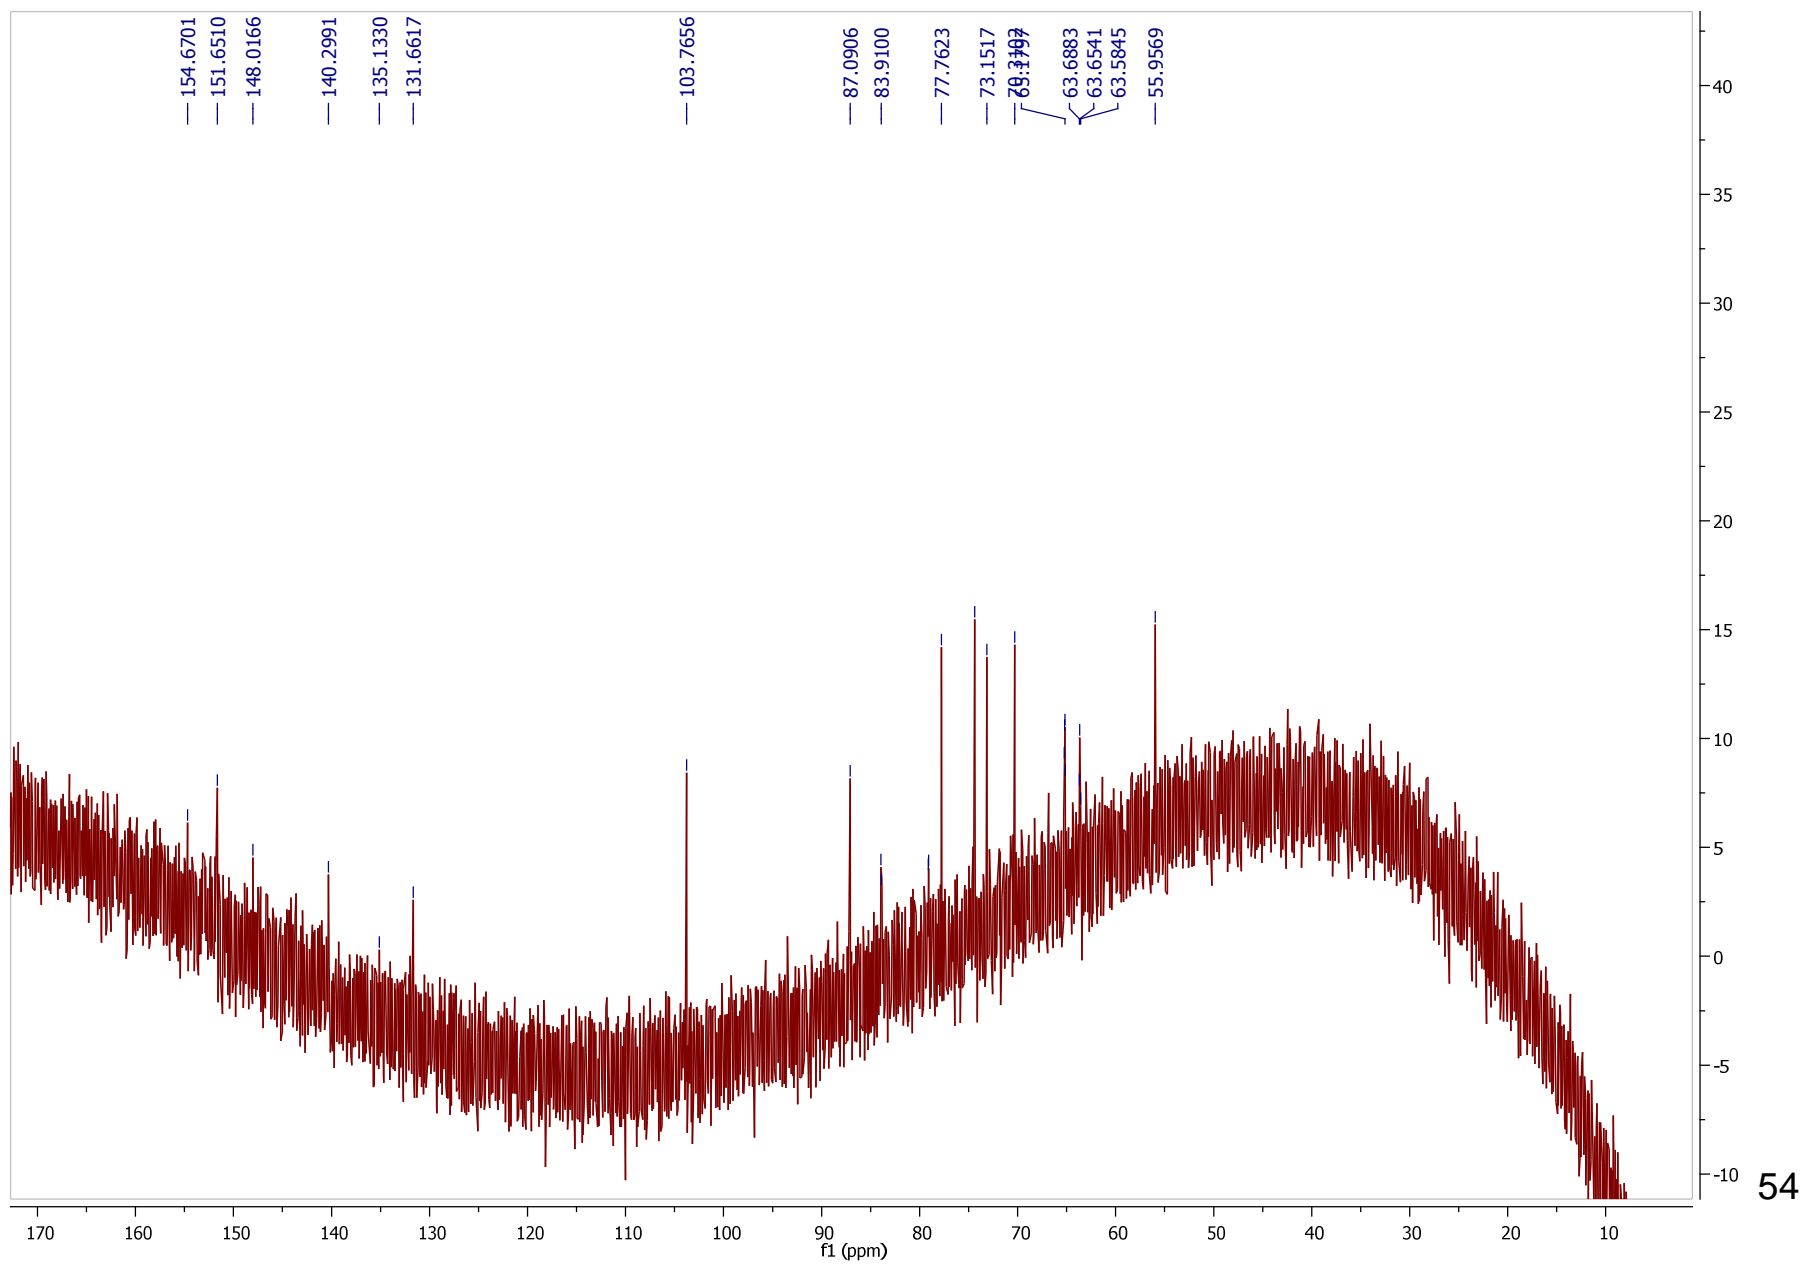

**1',2'-O-carbonate-3'-O-ethylcarbonate-ADP-ribofuranoside 16b: <sup>1</sup>H-NMR**

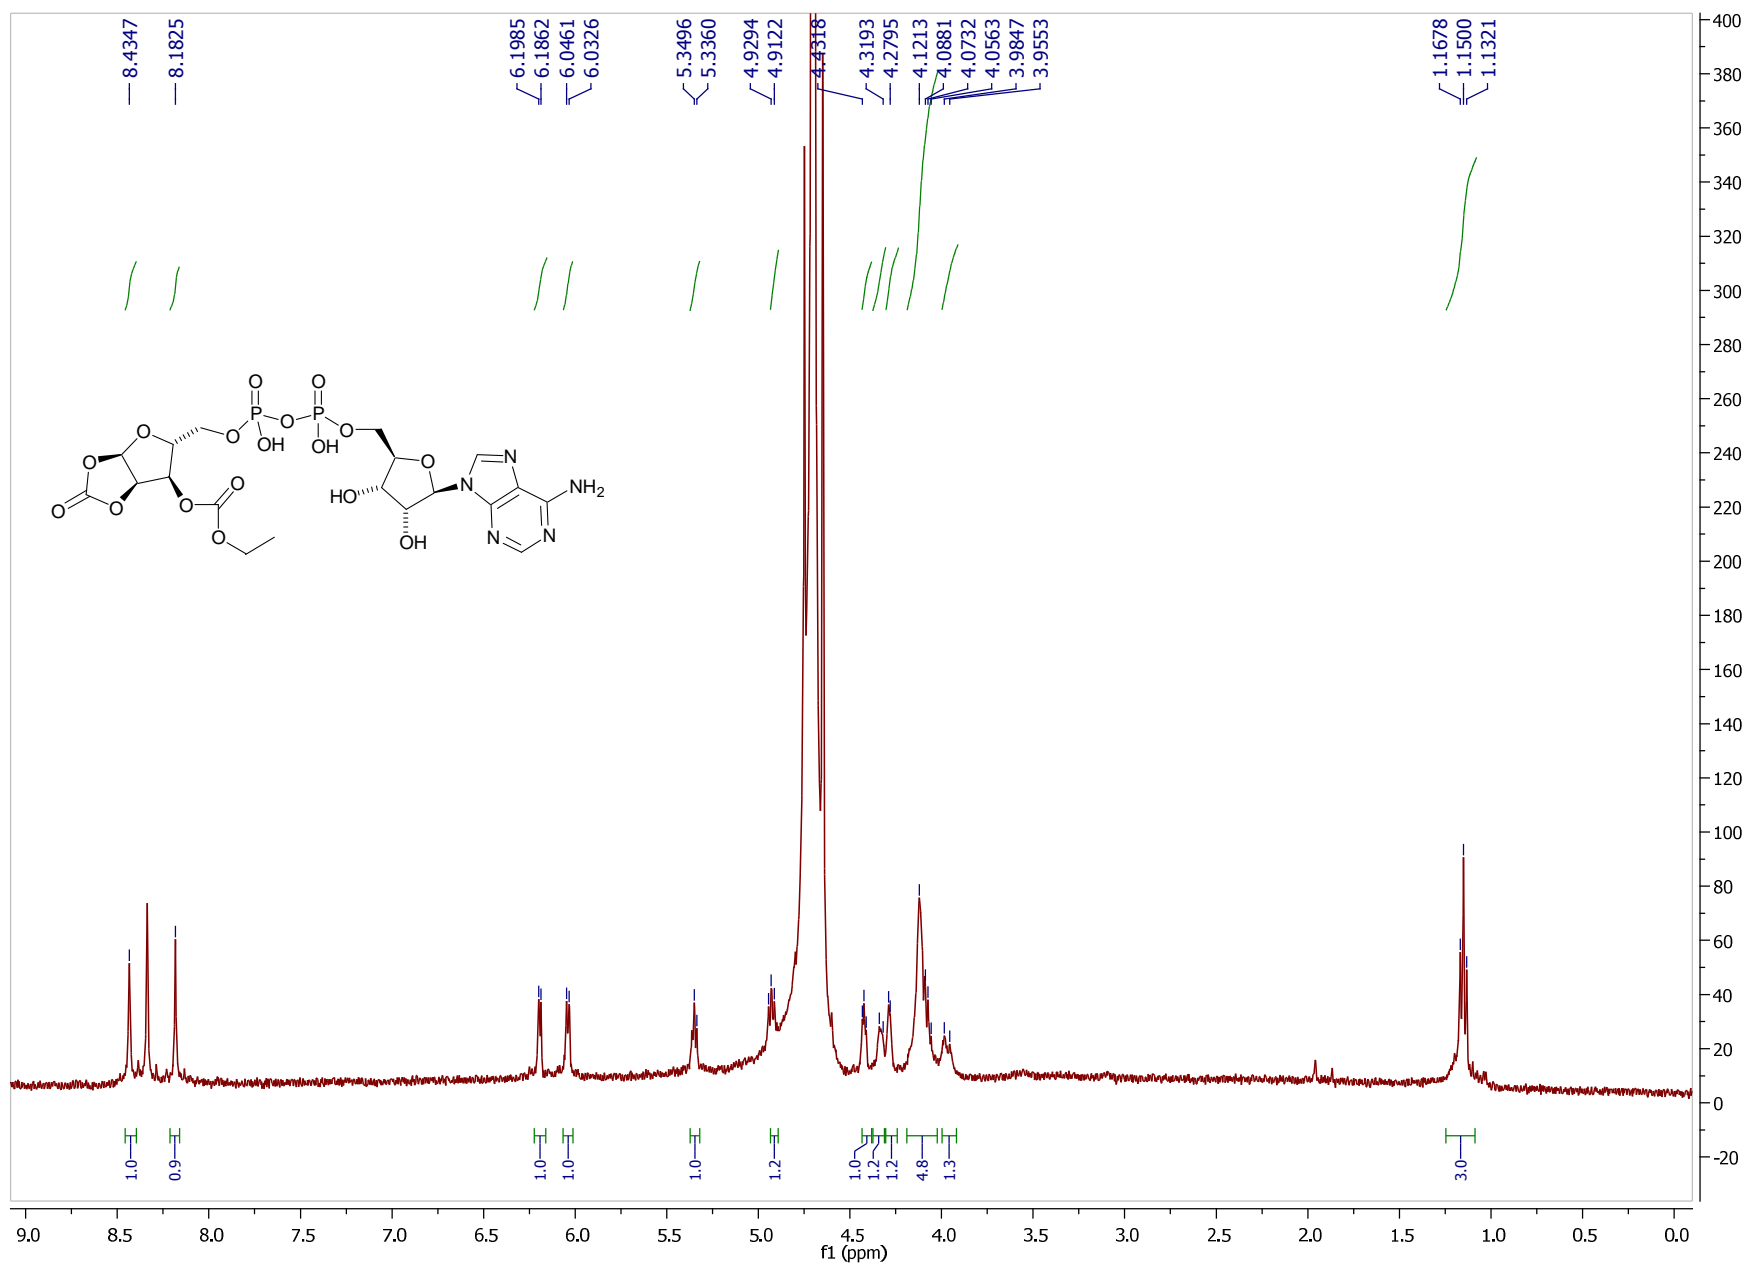

*1',2'-O-carbonate-3'-O-ethylcarbonate-ADP-ribofuranoside 16b*:  $^{13}\text{C}$ -NMR

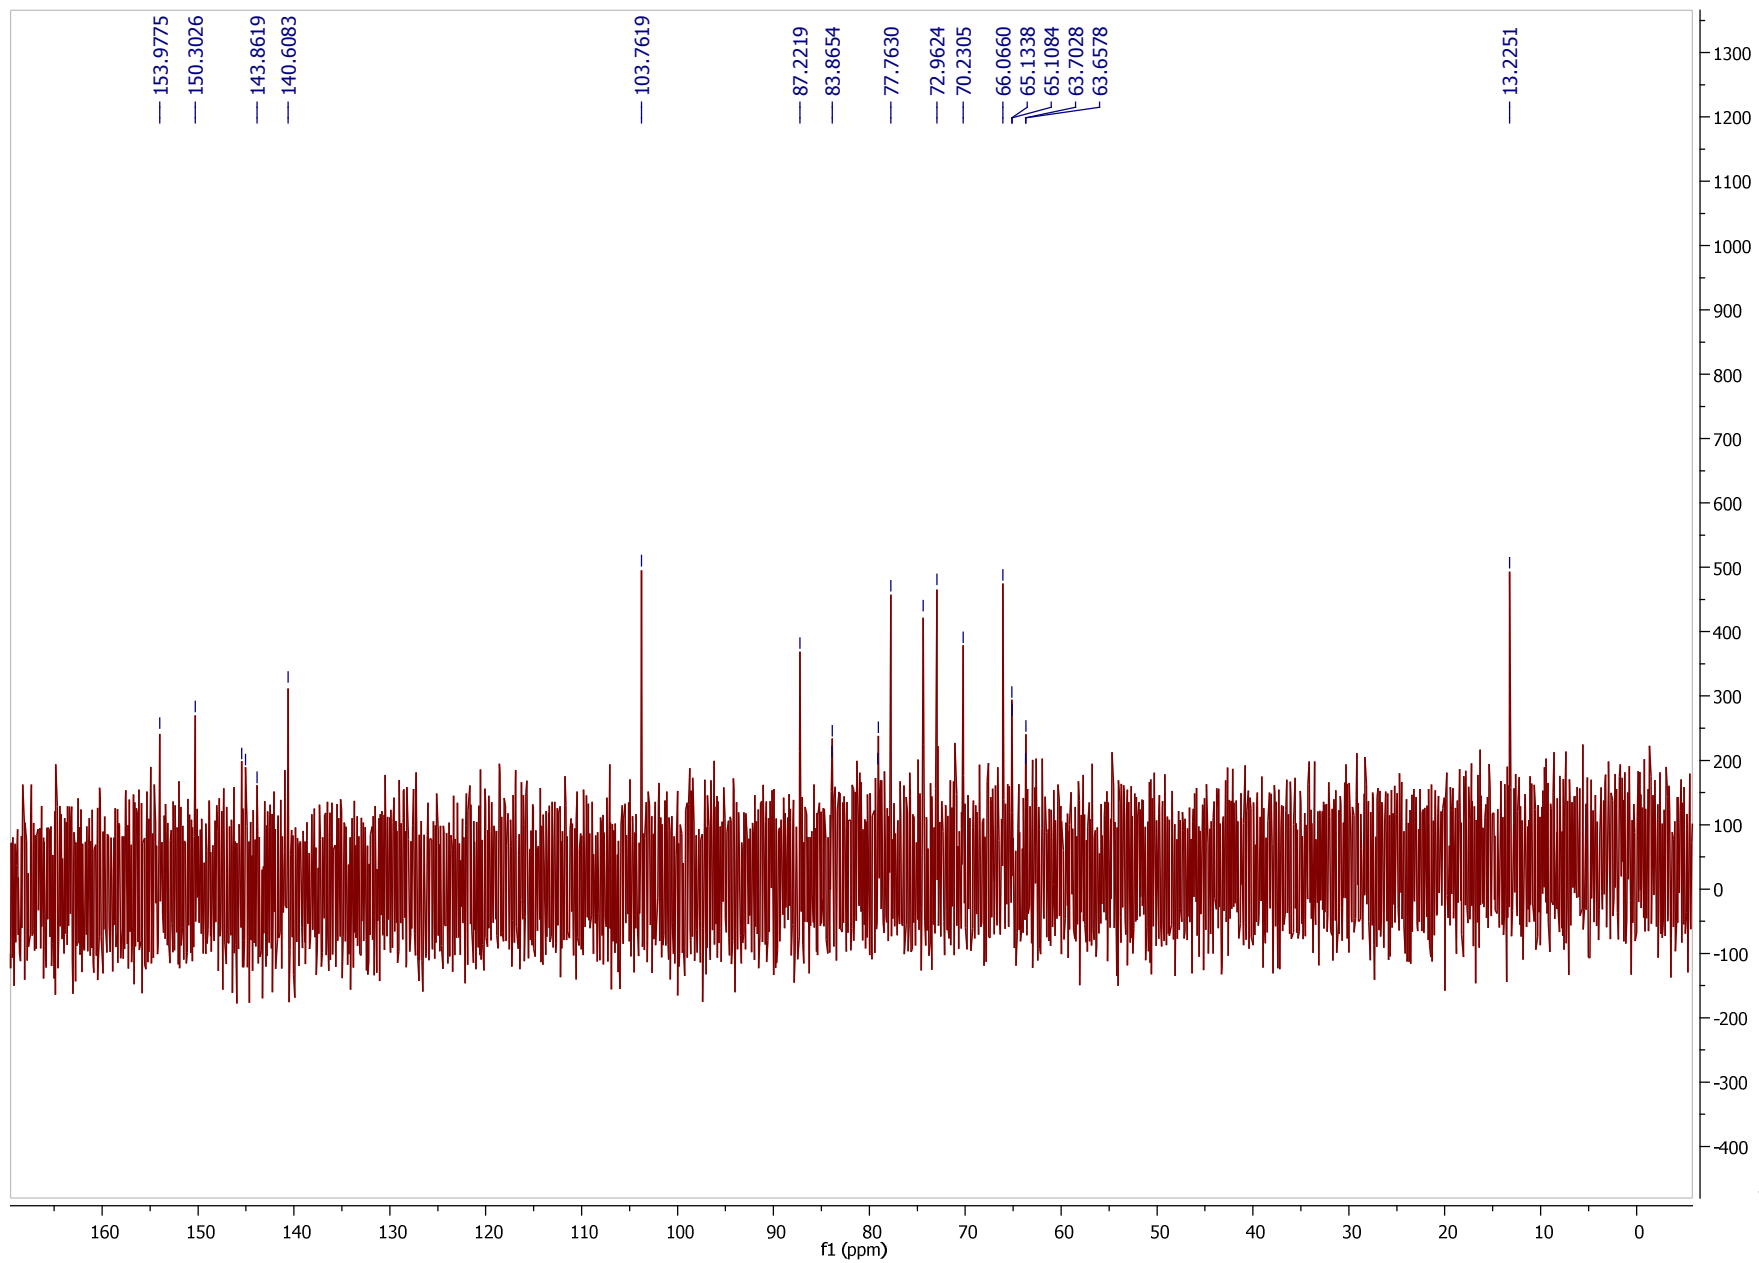



1',2'-O-carbonate-3'-O-isobutylcarbonate-ADP-ribofuranoside **16c**: <sup>1</sup>H-NMR

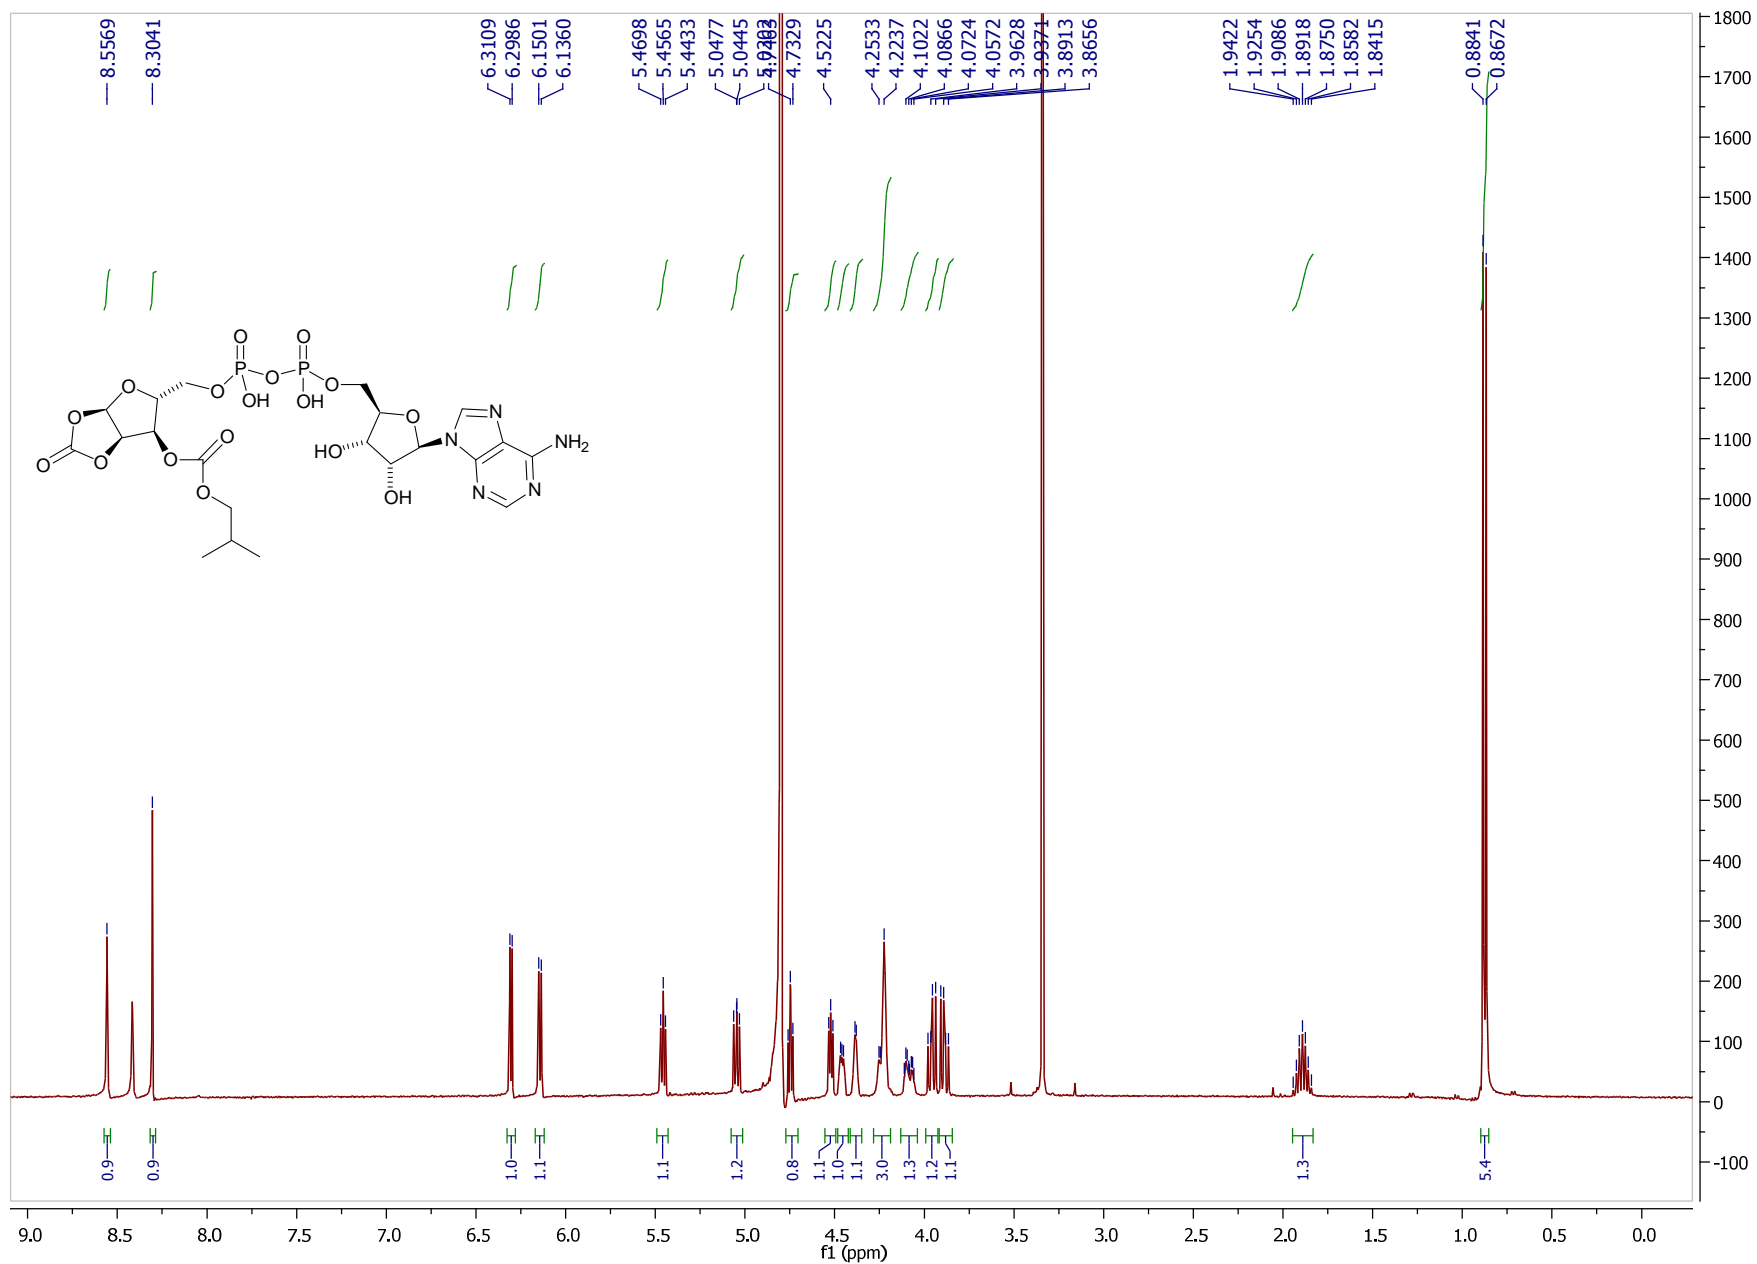

*1',2'-O-carbonate-3'-O-isobutylcarbonate-ADP-ribofuranoside 16c*:  $^{13}\text{C}$ -NMR

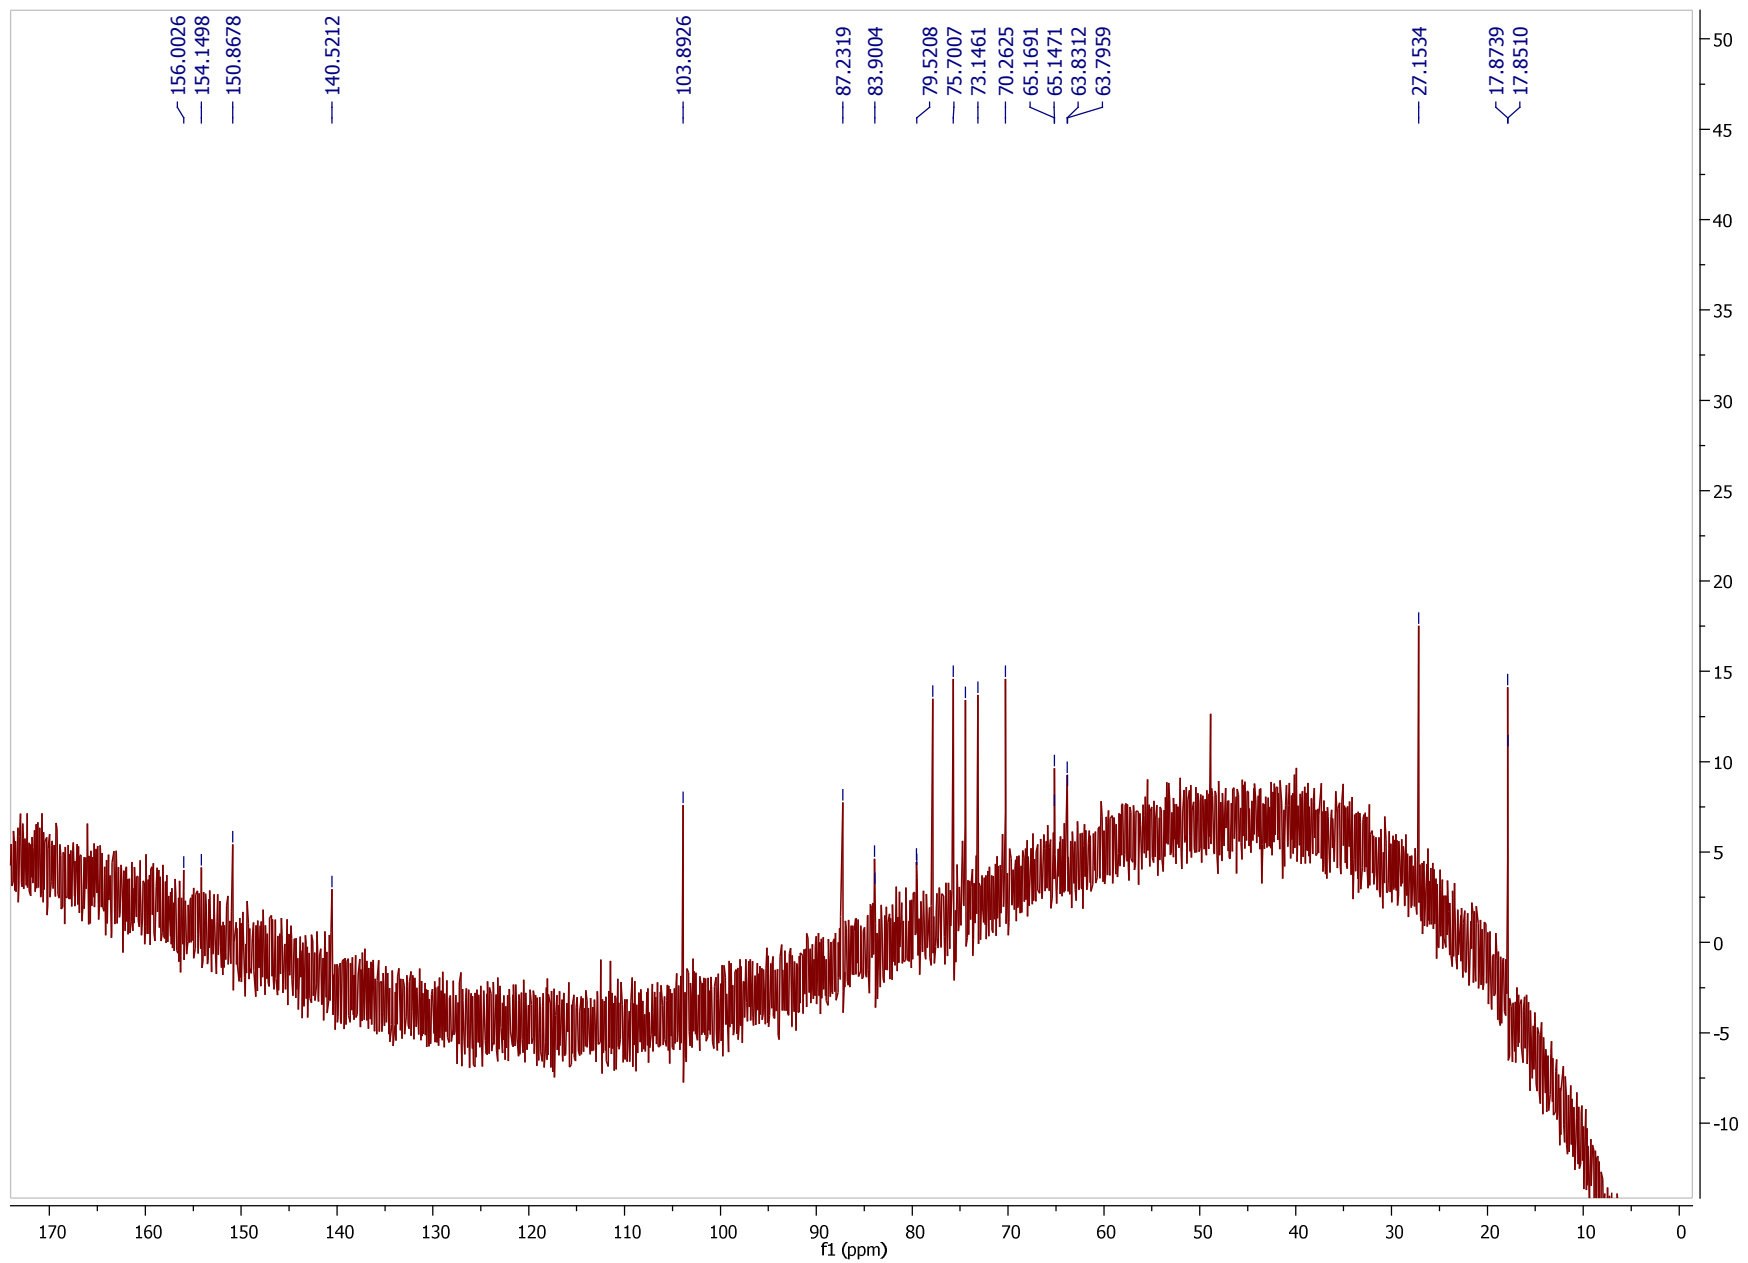

*1'*-O-benzyl-2',3'-O-bis(ethylcarbonate)-ADP-ribofuranoside **17b**: <sup>1</sup>H-NMR

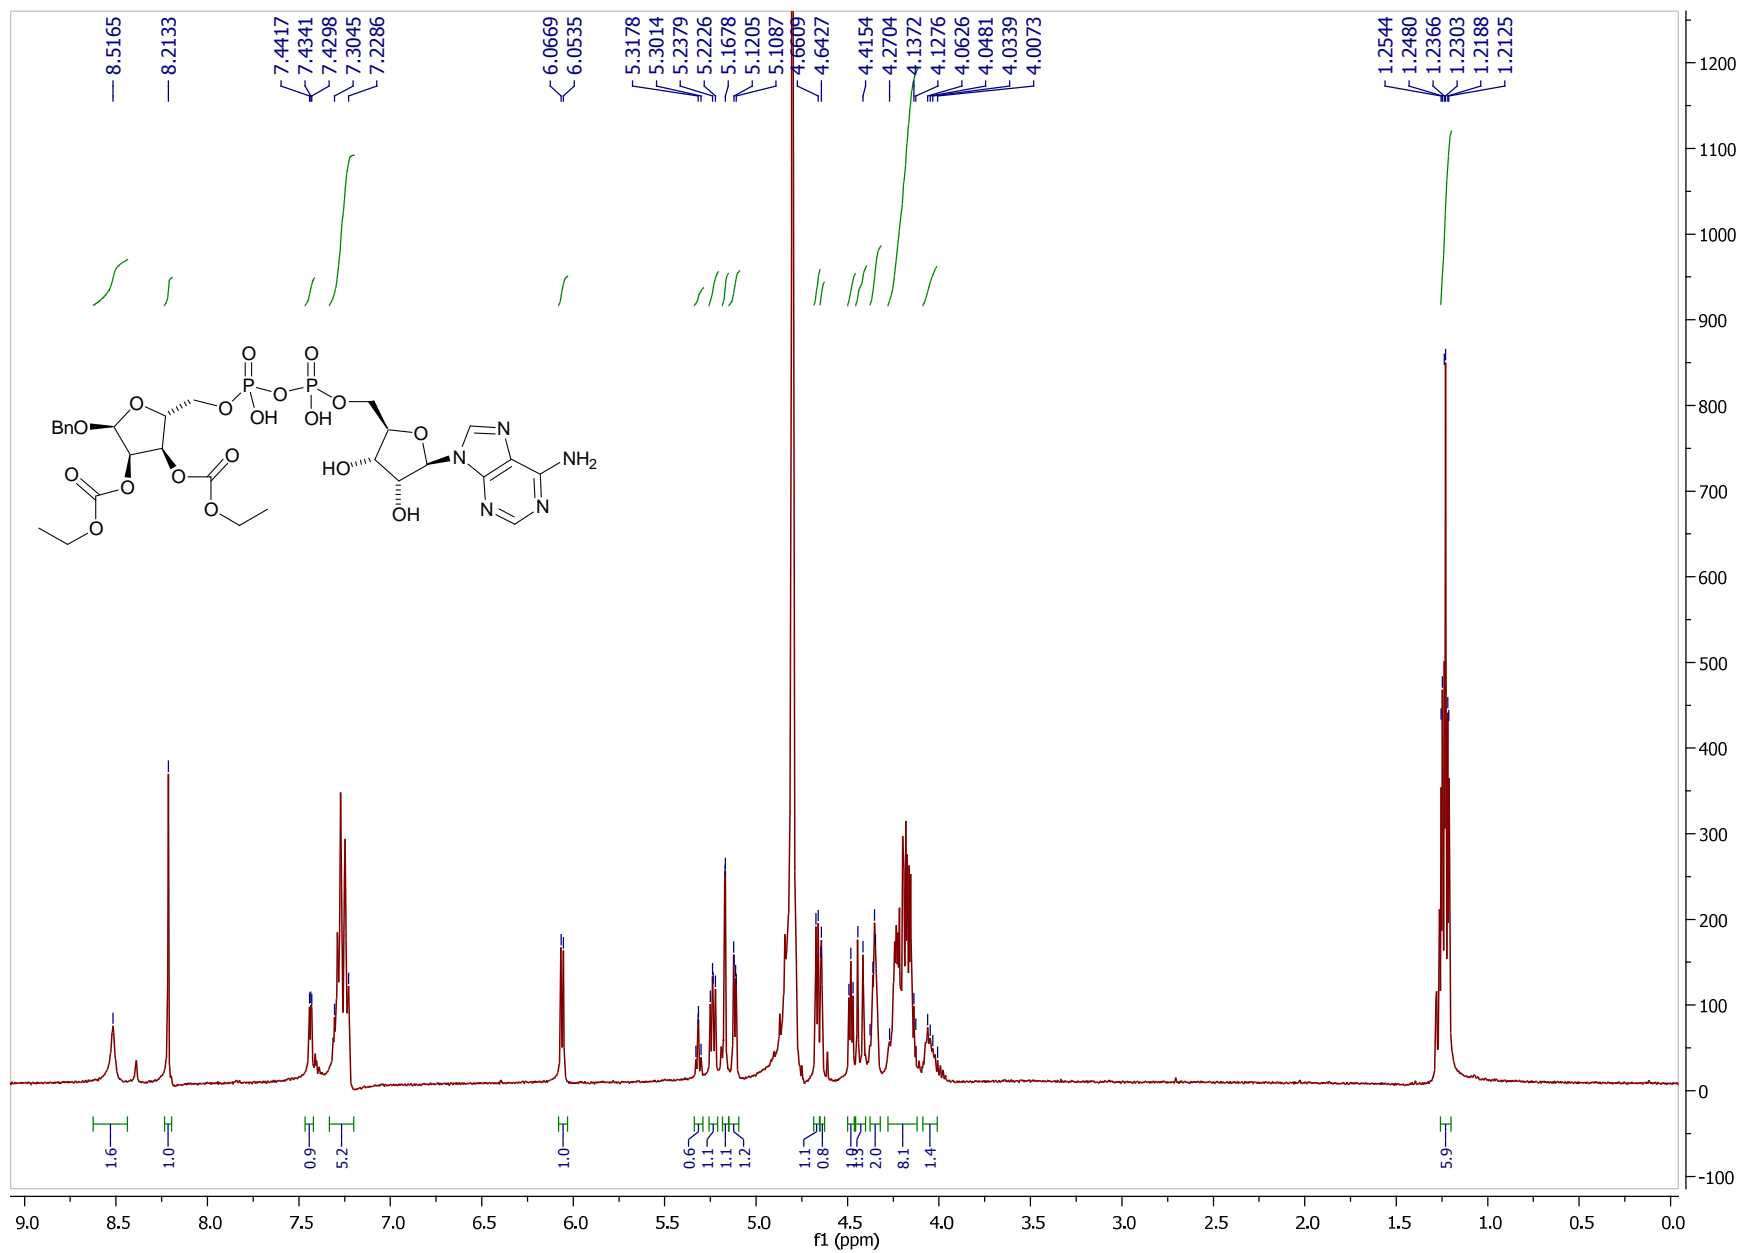

*1'-O-benzyl-2',3'-O-bis(ethylcarbonate)-ADP-ribofuranoside 17b*: <sup>1</sup>H-NMR

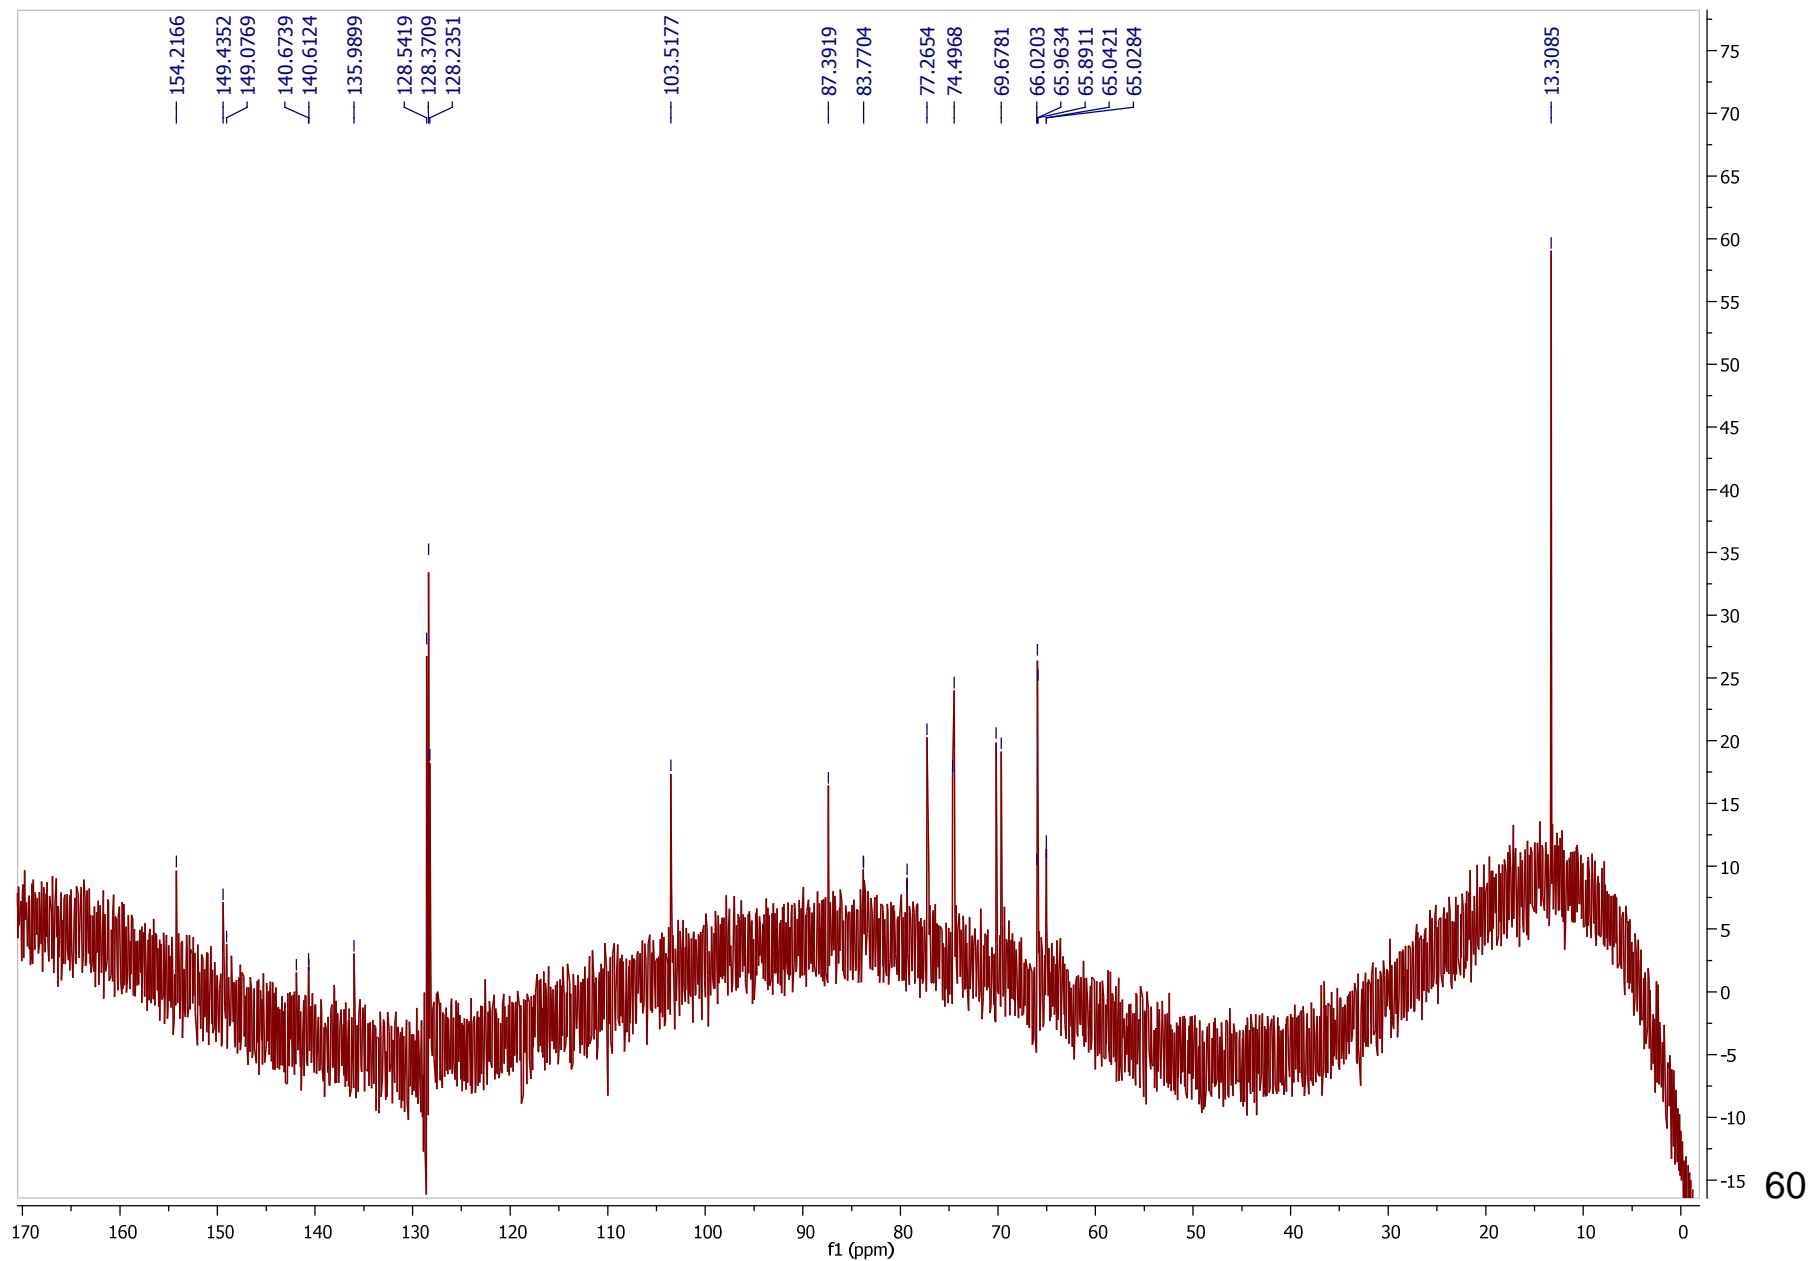

Supplement: c3ob41016a.pdf [file c3ob41016a.pdf]
